# Supplementary material for: Development and Characterization of New Single Nucleotide Polymorphism Markers from Expressed Sequence Tags in Common Carp (Cyprinus carpio)
Source: Int J Mol Sci. 2012 Jun 14;13(6):7343–53. doi: 10.3390/ijms13067343 (PMC3397529; doi:10.3390/ijms13067343)
Supplement: Supplementary file 2 [file ijms-13-07343-s002.txt]

Alignment for online common carp ESTs and the location of putative SNPs

1.                                                                                                                                 100                                                                                                 200                                                                                                 300                                                                                                 400                                                                                                 500                                                                                                 600                                                                                                 700                                                                                                 800                                                                                                 900                                                                                                 1000
                                             .........+.........+.........+.........+.........+.........+.........+.........+.........+.........|.........+.........+.........+.........+.........+.........+.........+.........+.........+.........|.........+.........+.........+.........+.........+.........+.........+.........+.........+.........|.........+.........+.........+.........+.........+.........+.........+.........+.........+.........|.........+.........+.........+.........+.........+.........+.........+.........+.........+.........|.........+.........+.........+.........+.........+.........+.........+.........+.........+.........|.........+.........+.........+.........+.........+.........+.........+.........+.........+.........|.........+.........+.........+.........+.........+.........+.........+.........+.........+.........|.........+.........+.........+.........+.........+.........+.........+.........+.........+.........|.........+.........+.........+.........+.........+.........+.........+.........+.........+.........|.........+.........+.........+.........+.........+.........+....
        Cyprinus_Cluster7873.seq.Contig1     AAAATACCCTAATAACATATCTTTAAAATAAAGACAAATATATATCTATCCCCCCCTAGTAAAAAACCCCAGTCCATAACAACCCCCCCCCTATGCATTAAAAACATGCCCAATTTCCCATCAAAGCTTCTGCCCCCCTATTAATGGATTTCACTCCTAACCCCCCAGCTAACATTATCCCCCTCTCTTTTTTGGGAATCCCGCGATAAAATTCCCACGAAAACTCTTTCCCTAATTACCCCTACTCAAATCACTCATATAGGAAATTGGAACCCCCCAGTCCCGCCCGAATCCCCGGTCCCCCCCCCTCCCCCATTTTTCTTCTGTTCCTTCTTTTCACTGCAGGACACTCTCTCAGCTGTTATGAGTGTATGGGTCTGACGGGTTCTTGCTCAGATCAAAGGGTAAAAACATGTCCCAGTGGATTTTCAAAGTGCATGAGTTCAACAACTGTAGCACAAGCTGGTGGCAACAGTGCTAAA*GTGATGCTTAAAGACTGTATTGCTGACTGTCCAAGTGGATCCATGAACCTCGGCATTGCAAAAACATCTTTTGCGTGCTGTAACACAGACCAGTGTAACGTCCAAGACGCTCCAGATCCTTCTAATGTCCCCAACGGGAAAGACGTGTTACTCTTGT*GATGGACAGAGCTGCTCAAACATATTGAGCTGTACAGGGAATGAAGACCGCTGCTTGAAAGCAACAGGGCGTTTCGGTGGCCAGTCAATGGTTATAAAAGGCTGTATCTCTAAATCTTTCTGTGATGCTGGATCATCGGTTCAGGATGTTCAGGGTGTCTCATGTTGTGAGGGGAACCTGTGTAACGGTGCTCAGAGCGTCACTCAGAGCTTCCTGTTCCTCTGCTGTTCTCTGCTCTCCTTCATCCTGCTGCACTGAATCCAGCAGCTCTTCACATTCACATCTACAATCAGACACACTGCACTGAATATAGAGCTTGTATATTCTCTGTACTGTGCATCTTTTGTGTCCTGGTATGTTTTTTTGGCTGTGACATTCTTCTGTAACATTTTTTTAAATAAAATACTACATTACCTTTAAAAA
                                             --------------------------------------------------------------------------------------------------------------------------------------------------------------------------------------------------------------------------------------------------------------------------------------------------------------------------------------------------------------------------------------------------------------------------------------------------------------------------------------------------------------------------------------------------------------------------------------------------------------------------------------------------------------------------------------------------------------------------------------------------------------------------------------------------------------------------------------------------------------------------------------------------------------------------------------------------------------------------------------------------------------------------------------------------------------------------------------------------------
      gi|28465229|gb|AU300950.1|AU300950     AAAATACCCTAATAACATATCTTTAAAATAAAGACAAATATATATCTATCCCCCCCTAGTAAAAAACCCCAGTCCATAACAACCCCCCCCCTATGCATTAAAAACATGCCCAATTTCCCATCAAAGCTTCTGCCCCCCTATTAATGGATTTCACTCCTAACCCCCCAGCTAACATTATCCCCCTCTCTTTTTTGGGAATCCCGCGATAAAATTCCCACGAAAACTCTTTCCCTAATTACCCCTACTCAAATCACTCATATAGGAAATTGGAACCCCCCAGTCCCGCCCGAATCCCCGGTCCCCCCCCCTCCCCCATTTTTCTT*T*TTCCCTCTTTTCCCCGCCGGACACTCCCCCACCT*TTATGGGGGGAGGGGGGGGGCGGTTTCTGGCTCA*ATACAAGGGTAAAAACATTCCCCGGTGTATTTCCCAAGTGCTTGATTTTAACAACTGTACCACAAGCTGGGGCCATCAGT*CTAAAAGGGAAGGTAAAAGACTTTATTGCTGACTTCCCAAGTGCCCCCCCCACCCCCGCCATTGCAAAAAAATCTTTGGCGGGCTGAAACACAGCCCAGTGTACCTCCCAAGCCCCCCCATACCCTTTTAATTCCCCCACCGGGAAAGACGTTTTACTCTGGGAGGAGGA*AGAG*TGCCCAAACATGTGGAGCTTTACGGGGAATAAAGCCCGCTTCTTAAAACCAACGGGGACTTTCGTTGCCCATTCAATGTTTATAAAAGGCTTTTTCTCTAAATCTATCTGGGATGCGGAACCACCGGTCCAGGATGTTCGGGGTTTCTCATGTGGGGGGGGGACCCTGTGTAACGGTGCTCGGAGCGTCACACAGAGCTCCCTGTCCCTCTGCTGTTCTCTGCTCTCCTACATCCTGCTGCACTGAATCCAGCAGCTCTTCACATTCACATCTACAATCAGACACACGCCACGGAATATAGAGCTTGTATATTCTCTGTACTGTGCATCTTTTGTGTCCTGGTATGTTTTTTTTGCTGTGACATTCTTCTGTAACATTTTTTTAAATAAAATACTACATTACCTTTAAAAA
      gi|50739404|gb|CA965919.2|CA965919                                                                                                                                                                                                                                                                                                        LLLLLLLLLLLLLLLLLLLLLLLLTTTTTCTTCTGTTCCTTCTTTTCACTGCAGGACACTCTCTCAGCTGTTATGAGTGTATGGGTCTGACGGGTTCTTGCTCAGATCAAAGGGTAAAAACGTGTCCCAGTGGATTTTCAAAGTGCATGAGTTCAACAACTGTAGCACAAGCTGGTGGCAACAGTGCTAAA*GTGATGCTTAAAGACTGTATTGCTGACTGTCCAAGTGGATCCATGAACCTCGGCATTGCAAAAACATCTTTTGCGTGCTGTAACACAGACCAGTGTAACGTCCAAGACGCTCCAGATCCTTCTAATGTCCCCAACGG*AAAGACGTGTTACTCTTGT*GATGGACAGAGCTGCTCAAACATATTGAGCTGTACAGGGAATGAAGACCGCTGCTTGAAAGCAACAGGGAGTTTCGGTGGCCAGTCAATGGTTACAAAAGGCTGTATCTCTAAATCTTTCTGTGATGCTGGATCATCGGTTCAGGATGTTCAGGGTGTCTCATGTTGTGAGGGGAACCTGTGTAACGGTGCTCAGAGCGTCACTCAGAGCTTCCTGTTCCTCTGCTGTTCTCTGCTCTCCTTCATCCTGCTGCACTGAATCCAACAGCTCTTCACATTCACATCTACAATCAGACACACTGCACTGAATA                                                                                                                 
     gi|109280649|gb|EC392867.1|EC392867                                                                                                                                                                                                                                                                                                            LLLLLLLLLLLLLLLLLLLLTTTTTCTTCTGTTCCTTCTTTTCACTGCAGGACACTCTCTCAGCTGTTATGAGTGTATGGGTCTGACGGGTTCTTGCTCAGATCAAAGGGTAAAAACATGTCCCAGTGGATTTTCAAAGTGCATGAGTTCAACAACTGTAGCACAAGCTGGTGGCAACAGTGCTAAA*GTGATGCTTAAAGACTGTATTGCTGACTGTCCAAGTGGATCCATGAACCTCGGCATTGCAAAAACATCTTTTGCGTGCTGTAACACAGACCAGTGTAACGTCCAAGACGCTCCAGATCCTTCTAATGTCCCCAACGG*AAAGACGTGTTACTCTTGT*GATGGACAGAGCTGCTCAAACATATTGAGCTGTACAGGGAATGAAGACCGCTGCTTGAAAGCAACAGGGCGTTTCGGTGGCCAGTCAATGGTTATAAAAGGCTGTATCTCTAAATCTTTCTGTGATGCTGGATCATCGGTTCAGGATGTTCAGGGTGTCTCATGTTGTGAGGGGAACCTGTGTAGCGGTGCTCAGAGCGTCACTCAGAGCTTCCTGTTCCTCTGCTGTTCTCTGCTCTCCTTCATCCTGCTGCACTGAATCCAGCAGCTCTTCACAT******CTACAATCAGACACACTGCACTGAATATAGAGCTTGTATATTCTCTGTACTGTGCATCTTTTGTGTCC                                                                        
     gi|109279584|gb|EC392321.1|EC392321                                                                                                                                                                                                                                                                                                                                                                                                                                        LLLGGATTTTCAAAGTGCATGAGTTCAACAACTGTAGCACAAGCTGGTGGCAACAGTGCTAAA*GTGATGCTTAAAGACTGTATTGCTGACTGTCCAAGTGGATCCATGAACCTCGGCATTGCAAAAACATCTTTTGCGTGCTGTAACACAGACCAGTGTAACGCCCAAGACGCTCCAGATCCTTCTAATGTCCCCAACGG*AAAGACGTGTTACTCTTGT*GATGGACAGAGCTGCTCAAACATATTGAGCTGTACAGGGAATGAAGACCGCTGCTTGAAAGCAACAGGGCGTTTCGGTGGCCAGTCAATGGTTATAAAAGGCTGTATCTCTAAATCTTTCTGTGATGCTGGATCATCGGTTCAGGATGTTCAGGGTGTCTCATGTTGTGAGGGGAACCTGTGTAACGGTGCTCAGAGCGTCACTCAGAGCTTCCTGTTCCTCTGCTGTTCTCTGCTCTCCTTCATCCTGCTGCACTGAATCCAGCAGCTCTTCACAT******CTACAATCAGACACACTGCACTGAATATAGAGCTTGTATATTCTCTGTACTGTGCATCTTTTGTGTCCTGGTATGTTTTTTTGGCTGTGACATTCTGCTGTGACATTT                                

Putative SNPs: 584T>C, 711A>C

2.
                                                                                                                                                100                                                                                                 200                                                                                                 300                                                                                                 400                                                                                                 500                                                                                                 600                                                                                                 700                                                                                                 800                                                                                                 900                                                                                                 1000
                                             .........+.........+.........+.........+.........+.........+.........+.........+.........+.........|.........+.........+.........+.........+.........+.........+.........+.........+.........+.........|.........+.........+.........+.........+.........+.........+.........+.........+.........+.........|.........+.........+.........+.........+.........+.........+.........+.........+.........+.........|.........+.........+.........+.........+.........+.........+.........+.........+.........+.........|.........+.........+.........+.........+.........+.........+.........+.........+.........+.........|.........+.........+.........+.........+.........+.........+.........+.........+.........+.........|.........+.........+.........+.........+.........+.........+.........+.........+.........+.........|.........+.........+.........+.........+.........+.........+.........+.........+.........+.........|.........+.........+.........+.........+.........+.........+.........+.........+.........+.........|.........+.....
        Cyprinus_Cluster7877.seq.Contig1     TTCGGCCTTACGGCCGGGGGGACTGCTGGCTGCCCTTCGCATTACCAAGAGCAAAATGCACAACCATACCATTGTATTTCAGGGTGCAGGGGAGGCCGCAATGGGCATAGCTGAGCTCATCATTATGGCAATGGAGAAAGAGGGGCTTCCTCGTGAGCAGTGTATAAAGAAAATCTGGATGGTGGACTCTAAAGGTCTTATTGTTAAGGGTAGGGATCACCTCACCCATGAGAAAAAGAGGTTTGCACATGAGCATGCTCAAATGAAAAAGCTTGAGGATGTAGTGAAGGAGCTGAAACCCACTGCTATAATTGGGGTGGCAGCTATCACTGGTGCTTTCACAGAGGAGATAATCAAGGCTATGGCATCCTTCAATGAGAGACCTATAATCTTTGCTCTAAGTAACCCCACCAGCAAGGCAGAGTGCACTGCTGAGCAGTGCTACACACTCACTGAGGGACGGGGGATATTTGCAAGTGGAAGTCCCTTTGATGTGATAACCCTTCCCGATGGGCGAAAGTTCTACCCTGGTCAGGGCAACAACGCTTATGTGTTCCCTGGAGTGGGGCTGGGGGTAACCGCTTGTGCAATGAGACACATCCCTGAGAATATTTTCCTCGTTGCGGCTGAGGCTATAGCAGAACTGGTGACCGAGAAGAATCTTGCAGAGGGGCGTCTGTATCCTCCGCTCAACTGCATCCAGGAAGTGTCCTTCAAGCTGGCTGTGAAGATTGTGGAGTACGCCTACAAAAACAAAATGGCAACACTGCATCCGGAGCCGCATGATAAAGAGGCTTTTGTTCGTTCGCTCATCTACAGCACAG*ACTACGAAGAGTTTGCGGTAGATTCATACAGCTGGCCTGAAAATGCGATGACTGTCCAAACATGTACACTGTGAGCTCCCAAAATGAGATTTACATGACAATTCTCTTTTAAATGTGATCTCTTAACATGATTATAATATTAAACACTACTGTTAACCTTAAAATATCCTCAATAAAATGTCATGTATTA
                                             -------------------------------------------------------------------------------------------------------------------------------------------------------------------------------------------------------------------------------------------------------------------------------------------------------------------------------------------------------------------------------------------------------------------------------------------------------------------------------------------------------------------------------------------------------------------------------------------------------------------------------------------------------------------------------------------------------------------------------------------------------------------------------------------------------------------------------------------------------------------------------------------------------------------------------------------------------------------------------------------------------------------------------------------------------
      gi|50743839|gb|CF661580.2|CF661580     TTCGGCCTTACGGCCGGGGGGACTGCTGGCTGCCCTTCGCATTACCAAGAGCAAAATGCACAACCATACCATTGTATTTCAGGGTGCAGGGGAGGCCGCAATGGGCATAGCTGAGCTCATCATTATGGCAATGGAGAAAGAGGGGCTTCCTCGTGAGCAGTGTATAAAGAAAATCTGGATGGTGGACTCTAAAGGTCTTATTGTTAAGGGTAGGGATCACCTCACCCATGAGAAAAAGAGGTTTGCACATGAGCATGCTCAAATGAAAAAGCTTGAGGATGTAGTGAAGGAGCTGAAACCCACTGCTATAATTGGGGTGGCAGCTATCACTGGTGCTTTCACAGAGGAGATAATCAAGGCTATGGCATCCTTCAATGAGAGACCTATAATCTTTGCTCTAAGTAACCCCACCAGCAAGGCAGAGTGCACTGCTGAGCAGTGCTACACACTCACTGAGGGACGGGGGATATTTGCAAGTGGAAGTCCCTTTGATGTGATAACCCTTCCCGATGGGCGGAAGTTCTACCCTGGTCAGGGCAACAACGCTTATGTLLLL                                                                                                                                                                                                                                                                                                                                                                                                                                                                           
      gi|50741311|gb|CF662420.2|CF662420                                                                                                                                                                                                                   AGGGTAGGGATCACCTCACCCATGAGAAAAAGAGGTTTGCACATGAGCATGCTCAAATGAAAAAGCTTGAGGATGTAGTGAAGGAGCTGAAACCCACTGCTATAATTGGGGTGGCAGCTATCACTGGTGCTTTCACAGAGGAGATAATCAAGGCTATGGCATCCTTCAATGAGAGACCTATAATCTTCGCTCTAAGCAACCCCACCAGCAAAGCAGAGTGCACTGCTGAGCAGTGCTACACACTCACTGAGGGACGGGGGATATTTGCAAGTGGAAGTCCCTTTGATGTGATAACCCTTCCCGATGGGCGGAAATTCTACCCTGGTCAGGGCAACAACGCTTATGTGTTTCCTGGAGTGGGGCTGGGGGTCACCGCTTGTGCAATGAGACATATCCCTGAGGATATATTCCTCATTACAGCTGAGGCTATAGCGGAACTGGTGACAGAGAAGGATCTTGCAGAGGGGCGTCTGTATCCTCCTCTCAACAGCATCCGGGAAGTTTCATTCAAGCTGGCTGTGAAGATCGTGGAGTACGCCTACAAAAACAAAATGGCAATGCTGCATCCGGAGCCACATGATAAAGAGGCTTTTGTTCATTCGCTCATCTTCAGCACAG*ACTACGAAGAGTTTGCAGTGGATTCGTACAGCTGGCCTGAGAATGCCATGGCTGTCCAAATGTGCAGACTGTGACCTCCCAAAATLLLLLLLLLLLLLLLLLLLLLLLLLLLLLLLLLLLLLLLLLLLLLLLLLLLLLLLLLLLLLLLLLLLLLLLLLLLLLLLLLLLLLLLLLLL              
      gi|50740944|gb|CA967108.2|CA967108                                                                                                                                                                                                                                                                                                                                                                                                                                                                                             LLLLLLLLLAGTCCCTTTGATCCAGTGACCCTTCCCGATGGGCGAAAGTTCTACCCTGGTCAGGGCAACAACGCTTATGTGTTCCCTGGAGTGGGGCTGGGGGTAACCGCTTGTGCAATGAGACACATCCCTGAGAATATTTTCCTCGTTGCGGCTGAGGCTATAGCAGAACTGGTGACCGAGAAGAATCTTGCAGAGGGGCGTCTGTATCCTCCGCTCAACTGCATCCAGGAAGTGTCCTTCAAGCTGGCTGTGAAGATTGTGGAGTACGCCTACAAAAACAAAATGGCAACACTGCATCCGGAGCCGCATGATAAAGAGGCTTTTGTTCGTTCGCTCATCTACAGCACAG*ACTACGAAGAGTTTGCGGTAGATTCATACAGCTGGCCTGAAAATGCGATGACTGTCCAAACATGTACACTGTGAGCTCCCAAAATGAGATTTACATGACAATTCTCTTTTAAATGTGATCTCTTAACATGATTATAATATTAAACACTACTGTTAACCTTAAAATATCCTCAATAAAATGTCATGTATT 
      gi|50738876|gb|CA965508.2|CA965508                                                                                                                                                                                                                                                                                                                                                                                                                                                                                                  LLLLAGTCCCTTTGATCCAGTGACCCTTCCCGATGGGCGAAAGTTCTACCCTGGTCAGGGCAACAACGCTTATGTGTTCCCTGGAGTGGGGCTGGGGGTAACCGCTTGTGCAATGAGACACATCCCTGAGAATATTTTCCTCGTTGCGGCTGAGGCTATAGCAGAACTGGTGACCGAGAAGAATCTTGCAGAGGGGCGTCTGTATCCTCCGCTCAACTGCATCCAGGAAGTGTCCTTCAAGCTGGCTGTGAAGATTGTGGAGTACGCCTACAAAAACAAAATGGCAACACTGCATCCGGAGCCGCATGATAAAGAGGCTTTTGTTCGTTCGCTCATCTACAGCACAGGAGGGGGAAGAGTTTGCGGTAGATTCATACAGCTGGCCTGAAAATGCGATGACTGTCCAAACATGTACACTGTGAGCTCCCAAAATGAGATTTACATGACAATTCTCTTTTAAATGTGATCTCTTAACATGATTATAATATTAAACACTACTGTTAACCTTAAAATATCCTCAATAAAATGTCATGTATTA

 Putative SNPs: 494G>C, 495T>C, 496G>A, 497G>A, 499G>A, 517G>A

3.
                                                                                                                                                100                                                                                                 200                                                                                                 300                                                                                                 400                                                                                                 500                                                                                                 600                                                                                                 700
                                             .........+.........+.........+.........+.........+.........+.........+.........+.........+.........|.........+.........+.........+.........+.........+.........+.........+.........+.........+.........|.........+.........+.........+.........+.........+.........+.........+.........+.........+.........|.........+.........+.........+.........+.........+.........+.........+.........+.........+.........|.........+.........+.........+.........+.........+.........+.........+.........+.........+.........|.........+.........+.........+.........+.........+.........+.........+.........+.........+.........|.........+.........+.........+.........+.........+.........+.........+.........+.........+.........|.........+.........+.........+........
        Cyprinus_Cluster7885.seq.Contig1     GGAGCACTCCCGCTCCACCAGCGCAATGAGTGGTGTGGGCGATGACAAGTCAGAGGTGTCTGAGAATGTGGACCACCACGCATCCCTCTACAGCAATGGCTTTGGTGTCTCCGCTTTACACGGTTACACACAGACCAAGACGATTGAGGTTCAGCAGAGATCCTCCTCTGTGGCAACACAACAGACCACCGTTTCGTCTGTCCCCTCGCATCCTTCAACCACTGGAAAAACCGTCCGTGCCATGTATGACTACTCTGCTGCAGACAATGATGAGGTGTCCTTCAAGGACGGTGACGTCATTATGAACGTGCAGGCCATCGATGAGGGTTGGATGTATGGCACTGTGCAGCGTACTGGAAAGACCGGTATGCTGCCCGCCAACTATGTGGAAGCCATCTGAATACACCTAGTGTCCTCTCAAACACCCTTTGGATGAGGGAGCTT*GAGATCCACTCAAATGGAAAAAACGATTTAATGTGTACTAATGTTAGTCAAAGTAGTTATGCTTCTGTTTTATCCTCATTACTCTTAGGAAATTTCCTTTGTGCCCATGTCACAAAGTCTATTGTGGTTGTGGCATGAGAAACTGACAAATTATACATACCTATTTCAGTCACAGACAATTGTATTTATCTTTGTTGTTCTATTCTAGCAGTTAAGTAACTGGAGCCCATTATTTTTTGTATATTGCAATCACACTAAATTCAAAGAAGTTTTAACTTTGAAACATTTGCACT
                                             ------------------------------------------------------------------------------------------------------------------------------------------------------------------------------------------------------------------------------------------------------------------------------------------------------------------------------------------------------------------------------------------------------------------------------------------------------------------------------------------------------------------------------------------------------------------------------------------------------------------------------------------------------------------------------------------------------------------------------------------------------------------
      gi|50742737|gb|CF660638.2|CF660638     GGAGCACTCCCGCTCCACCAGCGCAATGAGTGGTGTGGGCGATGACAAGTCAGAGGTGTCTGAGAATGTGGACCACCACGCATCCCTCTACAGCAATGGCTTTGGTGTCTCCGCTTTACACGGTTACACACAGACCAAGACGATTGAGGTTCAGCAGAGATCCTCCTCTGTGGCAACACAACAGACCACCGTTTCGTCTGTCCCCTCGCATCCTTCAACCACTGGAAAAACCGTCCGTGCCATGTATGACTACTCTGCTGCAGACAATGATGAGGTGTCCTTCAAGGACGGTGACGTCATTATGAACGTGCAGGCCATCGATGAGGGTTGGATGTATGGCACTGTGCAGCGTACTGGAAAGACCGGTATGCTGCCCGCCAACTATGTGGAAGCCATCTGAATACACCTAGTGTCCTCTCAAACACCCTTTGGATGAGGGAGCTT*GAGATCCACTCAAATGGAAAAAACGATTTAATGTGTACT***GTTAGTCAAAGTAGTTATGCTTCTGTTTTATCCTCATTACTCTTAGGAAATTTCCTTTGTGCCCATGTCACAAAGTCTATTGTGGTTGTGGCATGAGAAACTGACAAATTATACATACCTATTTCAGTCACAGACAATTGTATTTATCTTTGTTGTTCTATTCTAGCAGTTAAGTAACTGGAGCCCATTATTTTTTGTATATTGCAATCACACTAAATTCAAAGAAGTTTTAACTTTGAAACATTTGCACT
      gi|50738231|gb|CA965036.2|CA965036                        LLLLLLLLGAGTGGTGTGGGCGATGAGAAGTCAGAGGTGTCTGAGAACGTGGACCACCACGCATCCCTCTACAGCAATGGCTTTGGTGTCTCCGCTCTACACGGTTACACACAGACCAAGACAACTGAGGTTCAGCAGAGATCCTCCTCTGTGGCAACACAACAGACCACCGTTTCTTCTGTCCCCTCACATCCCTCAACCACTGGAAAAACTGTCCGTGCCATGTATGACTACCCTGCTGCAGACAATGATGAAGTGTCCTTCAAGGACGGTGATGTAATTGTGAACGTGCAGTCTATCGATGAGGGCTGGATGTATGGCACTGTGCAGCGTACTGGAAAGACCGGTATGCTCCCTGCCAACTATGTGGAAGCCATCTAAATACAACTACTGTGCTCTCAAACTCCCTGTGGATGACGGAGTTTTGATATCCACTCA****GAACAAGCTATTTTATGTGTACTAATGTTAGTCAA*GTAGTTCCGCTACTGTTTG*TCCTCATTACTGTTGGGAAATTTATTTTGTGCCCATGTCACAAAGTCTTTTGTGGTTGTGGCATGAGAAACTGACAAACTATACATACCTATTTAAGTCACAGACAATTGTATTTATCTTTGTTGTTCTATTCTAACAGTTAAGTAACTGGAGCCCATTATTTTT*GTATATTGCAATCACACTALLLLLL                              
      gi|50742778|gb|CF660653.2|CF660653                          CGCAATGAGTGGTGTGGGCGATGATAAGTCAGAGGTGTCTGAGAATGTGGACCACCACGCATCCCTCTACAGCAATGGCTTTGGTGTCTCCGCTTTACACGGTTACACACAGACCAAGACGATTGAGGTTCAGCAGAGATCCTCCTCTGTGGCAACACAACAGACCACCGTTTCGTCTGTCCCCTCGCATCCTTCAACCACTGGAAAAACCGTCCGTGCCATGTATGACTACTCTGCTGCAGACAATGATGAGGTGTCCTTCAAGGACGGTGACGTCATTATGAACGTGCAGGCCATCAATGAGGGTTGGATGTATGGCACTGTGCAGCGTACTGGAAAGACCGGTATGCTGCCCGCCAACTATGTGGAAGCCATCTGAATACACCTAGTGTCCTCTCAAACACCCTTTGGATGAGGGAGCTT*GAGATCCACTCAAATGGAAAAAACGATTTAATGTGTACT***GTTAGTCAAAGTAGTTATGCTTCTGTTTTATCCTCATTACTCTTAGGAAATTTCCTTTGTGCCCATGTCACAAAGTCTATTGTGGTTGTGGCATGAGAAACTGACAAATTATACATACCTATTTCAGTCACAGACAATTGTATTTATCTTTGTTGTTCTATTCTAGCAGTTAAGTAACTGGAGCCCATTATTTTTTGTATATTGCAATCACACTAAATTCAAAGAAGTTTTAACTTT              
      gi|50742740|gb|CF660639.2|CF660639                                                                                                                                                                    ATCCTCGTCTGTGGCAACACAACAGACCACCGATTCGTCTGTCCCCTCGCATCCTTCAACCACTGGAAAAACCGTCCGTGCCATGTATGACTACTCTGCTGCAGACAATGATGAGGTGTCCTTCCAGGACGGTGACGTCATTATGAACGTGCAGGCCATCGATGAGGGTTGGATGTATGGCACTGTGCAGCGTACTGAAAAGACCGGTATGCTGCCCGCCAACTATGTGGAATCCATCTGAATACACCTAGTGTCCTCTCTAACACCCTTTGGATGAGGGAGCTT*GAGATCCACTCAAATGGAAAAAACGATTTAATGTGTACT***GCTAGTCAAAGTAGTTCTGCTTCTGTTTTATCCTCATTACTCTTAGGAAATTTCCTTTGTGCCCATGTCACACAGTCTATTGTGGTTGTG                                                                                                                                                                 

Putative SNPs: 504A>C

4.
                                                                                                                                                100                                                                                                 200                                                                                                 300                                                                                                 400                                                                                                 500                                                                                                 600                                                                                                 700
                                             .........+.........+.........+.........+.........+.........+.........+.........+.........+.........|.........+.........+.........+.........+.........+.........+.........+.........+.........+.........|.........+.........+.........+.........+.........+.........+.........+.........+.........+.........|.........+.........+.........+.........+.........+.........+.........+.........+.........+.........|.........+.........+.........+.........+.........+.........+.........+.........+.........+.........|.........+.........+.........+.........+.........+.........+.........+.........+.........+.........|.........+.........+.........+.........+.........+.........+.........+.........+.........+.........|.........+.........+.
        Cyprinus_Cluster7889.seq.Contig1     GGGGGCTTGCTGTGGATTCGGTCTTGGTTGAGCTGTTGAGTTCCAAGTGCCAAAATGTCCAAACTCGGTTATTATCTTGAGCAGCTTTCCTATCAGGGAATGCAAGACAACACAGGGGGGCAGGGCACAGTGAGGCCTTTTGCTCAGTTTAATGCAGCTACCGATGCAGGTGTCTTGGACAAGGCTATCAAGACAAAAGGTGTGGATGAGGTCACAATCATTGAAACGCTGGTCCGCAGGAGCAATGCCCAGCGCCAGCAAATCAAGGCAGCTTACCAGCAAGCAAATGGCAAGCCTCTGGATGTAGCGCTGAAAGCTGCTCTTAAAGGTGAACTGGAAGAAGTGGTTCTGAGCTTGTTGATGACTCCAGCTCAATATGATTCTTTTCTGCTCAAAAGTGCCATGAAGGGTTTGGGCACAGATGAAGATACGCTTGTCGAGATTTTGGCCTCCAGGACCAATAAAGAGATCCAAGAGATTAAACAGGTTTTCAAACAAGAATATAAGAAGGATCTAGAGGCGGAGATCAAGTCTGAGACAAGTGGAGATTTCAGGAATGCCCTGCTTTCTCTCTGCAAGGCTACCAGAAGTGAAGACAGTTTTGTGCAAGAAGACTTGGCTGACAAAGATGCCAGGGCCATGTATGAGGCAGGAGAGAAAGAAAAGGCACAGACTGCGGCGTGTTCATTGACATCCTCACTTCAGGAATGCTTGTCACCTG
                                             -------------------------------------------------------------------------------------------------------------------------------------------------------------------------------------------------------------------------------------------------------------------------------------------------------------------------------------------------------------------------------------------------------------------------------------------------------------------------------------------------------------------------------------------------------------------------------------------------------------------------------------------------------------------------------------------------------------------------------------------------
     gi|109280348|gb|EC392715.1|EC392715     GGGGGCTTGCTGTGGATTCGGTCTTGGTTGAGCTGTTGAGTTCCAAGTGCCAAAATGTCCAAACTCGGTTATTATCTTGAGCAGCTTTCCTATCAGGGAATGCAAGACAGCACAGGGGGGCAGGGCACAGTGAGGCCTTTTGCTCAGCTTAATGCAGCTACCGATGCAGGTGTCTTGGACAAGGCTATCAAGACAAAAGGTGTGGATGAGGTCACAATCATTGAAACGCTGGTCCGCAGGAGCAATGCCCAGCGCCAGCAAATCAAGGCAGCTTACCAGCAAGCAAATGGCAAGCCTCTGGATGTAGCGCTGAAAGCTGCTCTTAAAGGTGAACTGGAAGAAGTGGTTCTGAGCTTGTTGATGACTCCAGCTCAATATGATTCTTTTCTGCTCAAAAGTGCCTTGAAGGGTTTGGGCACAGATGAAGATACGCTTGTCGAGATTTTGGCCTCCAGGACCAATAAAGAGATCCAAGAGATTAAACAGGTTTTCAAACAAGAATATAAGAAGGATCTAGAGGCGGAGATCAAGTCTGAGACAAGTGGAGATTTCAGGAATGCCCTGCTTTCTCTCTGCAAGGCTACCAGAAGTGAAGACAGTTTTGTGCAAGAAGACTTGGCTGACAAAGATGCCAGGGCCATGTATGA                                                                          
     gi|109280719|gb|EC392904.1|EC392904     GGGGGCTTGCTGTGGATTCGGTCTTGGTTGAGCTGTTGAGTTCCAAGTGCCAAAATGTCCAAACTCGGTTATTATCTTGAGCAGCTTTCCTATCAGGGAATGCAAGACAACACAGGGGGGCAGGGCACAGTGAGGCCTTTTGCTCAGTTTAATGCAGCTACCGATGCAGGTGTCTTGGACAAGGCTATCAAGACAAAAGGTGTGGATGAGGTCACAATCATTGAAACGCTGGTCCGCAGGAGCAATGCCCAGCGCCAGCAAATCAAGGCAGCTTACCAGCAAGCAAATGGCAAGCCTCTGGATGTAGCGCTGAAAGCTGCTCTTAAAGGTGAACTGGAAGAAGTGGTTCTGGGCTTGTTGATGACTCCAGCTCAATATGATTCTTTTCTGCTCAAAAGTGCCATGAAGGGTTTGGGCACAGATGAAGATACGCTTGTCGAGATTTTGGCCTCCAGGACCAATAAAGAGATCCAAGAGATTAAACAGGTTTTCAAACAAGAATATAAGAAGGATCTAGAGGCGGAGATCAAGTCTGAGACAAGTGGAGATTTCAGGAATGCCCTGCTTTCTCTCTGCAAGGCTACCAGAAGTGAAGACAGTTTTGTGCAAGAAGACTTGGCTGACAAAGATGCCAGGGCCATGTATGAGGCAGGAGAGAAAGAAAAGGCACAGACTGCGGCGTGTTCATTGACATCCTCACTTCAGGAATGCTTGTCACCTG
     gi|109284293|gb|EC394762.1|EC394762         LLLLGCTGTGGATTCGGTCTTGGTTGAGCTGTTGAGTTCCAAGTGCCAAAATGTCCAAACTCGGTTATTATCTTGAGCAGCTTTCCTATCAGGGAATGCAAGACAACACAGGGGGGCAGGGCACAGTGAGGCCTTTTGCTCAGTTTAATGCAGCTACCGATGCAGGTGTCTTGGACAAGGCTATCAAGACAAAAGGTGTGGATGAGGTCACAATCATTGAAACGCTGGTCCGCAGGAGCAATGCCCAGCGCCAGCAAATCAAGGCAGCTTACCAGCAAGCAAATGGCAAGCCTCTGGATGTAGCGCTGAAAGCTGCTCTTAAAGGTGAACTGGAAGAAGTGGTTCTGAGCTTGTTGATGACTCCAGCTCAATATGATTCTTTTCTGCTCAAAAGTGCCATGAAGGGTTTGGGCACAGATGAAGATACGCTTGTCGAGATTTTGGCCTCCAGGACCAATAAAGAGATCCAAGAGATTAAACAGGTTTTCAAACAAGAATATAAGGAGGATCTAGAGGCGGAGATCAAGTCTGAGACAAGTGGAGATTTCAGGAATGCCCTGCTTTCTCTCTGCAAGGCTACCAGAGGTGAAGACAGTTTTGTGCAAGAAGACTTGGC                                                                                                     
     gi|109279507|gb|EC392282.1|EC392282                                                                                                                                                                                                 LLLLLCAAAAGGCGTGGATGAGCTCACAATCATTGAAACACTGGTCCGCAGGAGCAATGCCCAGCGCCAGCAAATCAAGGCCGCTTACCAGCAAACAGTCGGCAAGCCTCTGGATGTAGCCTTGAAAGCTGCTCTTAAAGGTGAGCTGGAAGAAGTGGTTCTGGGCCTGTTGATGACTCCAGCTCAGTATGATTCCTTTCTGCTCCATGGTGCCATGAAGGGTTTGGGCACAGATGAAGAAACACTTGTCGAGATTTTGGCCTCTAGGACCAATAAAGAGATTCAAGAGATTAAACAGGTTTTCAAACAAGAATATAAGAAGGATCTAGAGGCGGCGATCAAGTCTGAGACAAGTGGAGACTTCAGGAATGCCCTGCTTGCTCTCTGCAAGGCTACCAGAAGTGAAGACAAGGTTGTGCAAGAGGAGTTGGCTGACAAAGATGCCAGGGCCTTATATGAGGCAGG                                                                    

Putative SNPs: 352A>G

5.
                                                                                                                                                100                                                                                                 200                                                                                                 300                                                                                                 400                                                                                                 500                                                                                                 600
                                             .........+.........+.........+.........+.........+.........+.........+.........+.........+.........|.........+.........+.........+.........+.........+.........+.........+.........+.........+.........|.........+.........+.........+.........+.........+.........+.........+.........+.........+.........|.........+.........+.........+.........+.........+.........+.........+.........+.........+.........|.........+.........+.........+.........+.........+.........+.........+.........+.........+.........|.........+.........+.........+.........+.........+.........+.........+.........+.........+.........|.........+.........+.........+.........+.........+.........+......
        Cyprinus_Cluster7892.seq.Contig1     GGGAGCGTACAAGTACATGCAGGAGCTCTGGAGGAAGAAGCAGTCGGACGTGATGAGGTTTCTGCTGCGTGTGCGGTGCTGGCAGTACCGTCAGCTGTCGGCCCTTCACCGGGCCCCGAGACCCACCAGACCCGATAAAGCCCGCAGACTGGGATACAAGGCCAAGCAGGGCTACGTCATCTACCGCATACGTGTGCGCCGTGGAGGCCGCAAGCGCCCCGTGCCTAAAGGTGCCACCTACGGCAAACCCGTGCACCACGGCGTCAACCAGATCAAGTTTGCACGCAGCCTGCAGTCAGTAGCTGAGGAGCGTGCGGGCCGTCACTGTGGAGGTCTGCGGGTGCTCAGCTCATACTGGGTGGGTGAAGACTCCACGTACAAGTTCTTCGAAGTGGTCCTCATCGACACCTTCCACAAAGCCATCAGACGCAACCCCGACACGCAATGGATCACCAAGGCTGTGCACAAGCACAGGGAGATGCGTGGGCTCACGTCTGCCGGCAAGAAGAGCCGTGGTTTGGGCAAGGGCCACAAGTTCCACCTCACCATCGGCGGCTCCCGGCGCGCGGCCTGGAAGAGACGCAACACCCTGCAGCTGCACCGTTACCGCTAGACAACGCGTGCT******GTACATTCACCCAAATAAAGTACCTTTGTATGCTA
                                             ------------------------------------------------------------------------------------------------------------------------------------------------------------------------------------------------------------------------------------------------------------------------------------------------------------------------------------------------------------------------------------------------------------------------------------------------------------------------------------------------------------------------------------------------------------------------------------------------------------------------------------------------------------------------------------------
      gi|50741012|gb|CA967210.2|CA967210     GGGAGCGTACAAGTACATGCAGGAGCTCTGGAGGAAGAAGCAGTCGGACGTGATGAGGTTTCTGCTGCGTGTGCGGTGCTGGCATTACCGTCGGGTGTCGGCCCTTCACCGGGCCCCTAGGCCCACCATACCCGATAAAGCCCGCAGGCTGGGATACAAGGCCAAGCAGGGGTACGTCATCTACCGCATACGTGTTCTCCGCGGAGGCCGCAAGCGCCCCGTGCCTAAAGGTGCCACC                                                                                                                                                                                                                                                                                                                                                                                                                                            
      gi|50740916|gb|CA967306.2|CA967306      GGAGCGTACAAGTACATGCAGGAGCTCTGGAGGAAGAAGCAGTCGGACGTGATGAGGTTTCTGCTGCGTGTGCGGTGCTGGCAGTACCGTCAGCTGTCGGCCCTTCACCGGGCCCCGAGGCCCACCAGACCCGATAAAGCCCGCAGGCTGGGATACAAGGCCAAGCAGGGGTACGTCATCTACCGCATACGTGTTCGCCGTGGAGGCCGCAAGCGCCCCGTGCCTAAAGGTGCCACCTACGGCAAACCCGTGCACCACGGCGTCAACCAGATCAAGTTTGCACGCAGCCTGCAGTCAGTAGCTGAGGAGCGTGCGGGCCGTCACTGTGGAGGTCTGCGGGTGCTCAGCTCATACTGGGTGGGTGAAGACTCCACATACAAGTTCTTCGAAGTGGTCCTCATCGACACCTTCCACAAAGCCATCAGACGCAACCCCGACACACAATGGATCACCAAGGCTGTGCACAAGCACAGGGAGATGCGTGGGCTCACGTCTGCCGGCAAGAAGAGCCGTGGGTTGGGCAAGGGCCACAAGTTCCACCTCACCATCGGCGGTTCTCGGCGCGCGGCCTGGAAGAGACGCAACACCCTGCAGCTGCACCGTTACCGCTAAACAACGCCTGCTACAACTGTACATTTGCCCAAATAAAGTACCTTTGTATGCTL
     gi|109284267|gb|EC394747.1|EC394747                                               LLLLLLLLLLLTGAGGTTTCTGCTGCGCGTGCGGTGCTGGCAGTACCGTCAGCTGTCGGCCCTTCACCGGGCCCCGAGACCCACCAGACCCGATAAAGCCCGCAGACTGGGATACAAGGCCAAGCAGGGCTACGTCATCTACCGCATACGTGTGCGCCGTGGAGGCCGCAAGCGCCCCGTGCCTAAAGGTGCCACCTACGGCAAACCCGTGCACCACGGCGTCAACCAGATCAAGTTTGCACGCAGCCTGCAGTCAGTAGCTGAGGAGCGTGCGGGCCGTCACTGTGGAGGTCTGCGGGTGCTCAGCTCATACTGGGTGGGTGAAGACTCCACGTACAAGTTCTTCGAAGTGGTCCTCATCGACACCTTCCACAAAGCCATCAGACGCAACCCCGACACGCAATGGATCACCAAGGCTGTGCACAAGCACAGGGAGATGCGTGGGCTCACGTCTGCCGGCAAGAAGAGCCGTGGTTTGGGCAAGGGCCACAAGTTCCACCTCACCATCGGCGGCTCCCGGCGCGCGGCCTGGAAGAGACGCAACACCCTGCAGCTGCACCGTTACCGCTAGACAACGCGTGCT******GTACATTCACCCAAATAAAGTACCTTCGTATG   
      gi|50743958|gb|CF661690.2|CF661690                                                                                                  LLLLLLLLLCCTTCACCGGGCCCCGAGACCCACCAGACCCGATAAAGCCCGCAGACTGGGATACAAGGCCAAGCAGGGCTACGTCATCTACCGCATACGTGTGCGCCGTGGAGGCCGCAAGCGCCCCGTGCCTAAAGGTGCCACCTACGGCAAACCCGTGCACCACGGCGTCAACCAGATCAAGTTTGCACGCAGCCTGCAGTCAGTAGCTGAGGAGCGTGCGGGCCGTCACTGTGGAGGTCTGCGGGTGCTCAGCTCATACTGGGTGGGTGAAGACTCCACGTACAAGTTCTTCGAAGTGGTCCTCATCGACACCTTCCACAAAGCCATCAGACGCAACCCCGACACGCAATGGATCACCAAGGCTGTGCACAAGCACAGGGAGATGCGTGGGCTCACGTCTGCCGGCAAGAAGAGCCGTGGTTTGGGCAAGGGCCACAAGTTCCACCTCACCATCGGCGGCTCCCGGCGCGCGGCCTGGAAGAAACGCAACACCCTGCAACTGCACCGTTACCGCTAGACAACGCGTGCT******GTACATTCACCCAAATAAAGTACCTTTGTATGCTA

Putative SNPs: 121G>A, 148G>A, 172G>C, 196T>G

6.
                                                                                                                                                100                                                                                                 200                                                                                                 300                                                                                                 400                                                                                                 500                                                                                                 600
                                             .........+.........+.........+.........+.........+.........+.........+.........+.........+.........|.........+.........+.........+.........+.........+.........+.........+.........+.........+.........|.........+.........+.........+.........+.........+.........+.........+.........+.........+.........|.........+.........+.........+.........+.........+.........+.........+.........+.........+.........|.........+.........+.........+.........+.........+.........+.........+.........+.........+.........|.........+.........+.........+.........+.........+.........+.........+.........+.........+.........|.........+.........+.........+.........+.........+.........+
        Cyprinus_Cluster7895.seq.Contig1     TTGGGGGACACAGACAAGATTAAAAACACGACACTGCGGTTCGAGAGAAGCCTTTGCTCGAGTCACGATGCTTCTCACGCTGCTTCTGATCTCCACGGCCGTTGCGAGTCCCCTGTTGGGTACGGAGCAGTGTGCCCGCGGTCCCCCCTACTGGTGCCAGAACGTCAAGACCGCTTCCCTTTGTGGTGCCGTCCAACACTGCCAACAGAATGTGTGGAGCAAGCCTCAGATGAAATCTGTGCCATGTGATCTGTGCAAAGAGGTGTTGATGGTGGTGGAGCAGCTTTTGAAGGACAATGCCACAGAGAGCGAACTCCTTGAATACATGGAGAAGGCCTGTCAGCTGATCCCTGATGAGGGCATGGCTGACCAGTGCAAGGAGATTGTGGACAACTATTTCCCCGTTCTCATGGACATCATCCAAGGAGAGCTGGACGACCCTGGTGTGGTGTGCTGTGCTCTTGGCCTGTGTGTGTCCCAGCAGGCAGCTCTGGCTAAAGCTCAGCTCATGTCCAATGAGATCCCTCCAGTGGACCTGAACCAGCGTGTCAACCCCTTCCTGATCAACATCCCTCAGCTGCTCTACCCCCAAGAGAAAACCAAG***GAGACCCCCAAACAGACGGATGGAGATGTGTGCCAAGACTGTGTTACGTTAAT
                                             ------------------------------------------------------------------------------------------------------------------------------------------------------------------------------------------------------------------------------------------------------------------------------------------------------------------------------------------------------------------------------------------------------------------------------------------------------------------------------------------------------------------------------------------------------------------------------------------------------------------------------------------------------------------------------------
     gi|109284487|gb|EC394864.1|EC394864     TTGGGGGACACAGACAAGATTAAAAACACGACACTGCGGTTCGAGAGAAGCCTTTGCTCGAGTCACGATGCTTCTCACGCTGCTTCTGATCTCCACGGCCGTTGCGAGTCCCCTGTTGGGTACGGAGCAGTGTGCCCGCGGTCCCCCCTACTGGTGCCAGAACGTCAAGACCGCTTCCCTTTGTGGTGCCGTCCAACACTGCCAACAGAATGTGTGGAGCAAGCCTCAGATGAAATCTGTGCCATGTGATCTGTGCAAAGAGGTGTTGATGGTGGTGGAGCAGCTTTTGAAGGACAATGCCACAGAGAGCGAACTCCTTGAATACATGGAGAAGGCCTGTCAGCTGATCCCTGACGAGGGCCTGGCTGACCAGTGTAAGGAGATTGTTGACAACTACTTCCCCATTCTCATGGGCATCATCGAAGGAGAACTGGATGACCCCGGTGTGGTGTGCAGTGCTATGGGTCTGTGTGTGTCCCAGCAGGCAGCTCTGGCTAAAGCTCAGCTCATGTCCAACGAGATCCCTAAGGTGGACCTGAACCAGCGTGTCAGCCCCTTCCTGCTCAACATCCCTCAGCTGCTCTACCCCCAAGAGAATACCAAGAAGGAGACCCCCAAACAGACTGGTGGAGATGTGT                      
           gi|2924688|gb|C88406.1|C88406                                                                                                                              ACGGAGCAGTGTGCTCTCGGTCCCCCCTACTGGTGCCAGAACGTCAAGACCGCTTCCCTTTGTGGTGCCGTCCAGCACTGCCAACAGAGTGTGTGGAGCAAGCCTCAGATGAAATCTGTGCCATGTGATCTGTGCAAAGAGGTGTTAGTGGTGGTGGAGCAGCTTTTGAAGGACAATGCCACAGAGAGCGAACTCCTTGGATACATGGAGAAGGCCTGTCAGCTGATCCCTGATGAGGGCATGGCTGACCAGTGCAAGGAGATTGTGGACAACTATTTCCCCGTTCTCATGGACATCATCCAAGGAGAGCTGGACGACCCTGGTGTGGTGTGCGGTGCTCTGGGCCTGTGTGTGTCCCAGCAGGCAGCTCTGGCTAAAGCTCAGCTCATGTCCAATGAGATCCCTCCAGTGGACCTGAACCAGCGTGTCAACCCCTTCCTGATCAACATCCCTCAGCTGCTCTACCCCCAAGA                                                                  
      gi|50733349|gb|CA967516.2|CA967516                                                                                                                                                                                                                                                                                                                                         LLLGGAGAAGGCCTGTCAACTGATCCCTGATGAGGGCATGGCTGACCACTGCAAGGAGATTGTGGACAACTATTTCCCCGTTCTAATGGACATCATCCAAAGAAAGCTGGACGACCCTGGTGTGGTGTGCTGTGCTCTTGGCCTGTGTGTGTCCCACCAGGCACCTCTGGCTAAAGCTTAGCTCATGTCCAATGATATCCCTCCAGGAGACCTGAACCAGCGTGTCAACCCCTTCCTGATCAACATCCCTCAGCTGCTCTACCCCCAAGAGAAAACCAAG***GAGACCCCCAAACAAACGGATGGAGATGTGTGCCAAGACTGTGTTACGTTAAT
      gi|50738753|gb|CA965384.2|CA965384                                                                                                                                                                                                                                                                                                                                                     CTGTCAACTGATCCCTGATGAGGGCTCGGCTGACCAGTGCAAGGAGATTGTGGACAACTATTTCCCCGTTCTCATGGACATCATCCAAGGAGAGCTGGACGACCCTGGTGTGGTGTGCTGGGCTCTTGGCCTGTGTGTGTCCCAACAGGCAGCTCTGGCTAAAGCTCAACTCATGTCCAATGAGATCCCTCCAGTGGACCTGAACCAGCGTGTCAACCCCTTCCTGATCAACATCCCTCAGCTGCTCTACCCCCAAGAGAAAACCAAG***GAGACCCCCAAACAGACGGATGGAAATGTGT                      

Putative SNPs: 343G>A, 463G>T

7.                                                                                                                                              100                                                                                                 200                                                                                                 300                                                                                                 400                                                                                                 500                                                                                                 600                                                                                                 700                                                                                                 800                                                                                                 900                                                                                                 1000                                                                                                1100                                                                                                1200
                                             .........+.........+.........+.........+.........+.........+.........+.........+.........+.........|.........+.........+.........+.........+.........+.........+.........+.........+.........+.........|.........+.........+.........+.........+.........+.........+.........+.........+.........+.........|.........+.........+.........+.........+.........+.........+.........+.........+.........+.........|.........+.........+.........+.........+.........+.........+.........+.........+.........+.........|.........+.........+.........+.........+.........+.........+.........+.........+.........+.........|.........+.........+.........+.........+.........+.........+.........+.........+.........+.........|.........+.........+.........+.........+.........+.........+.........+.........+.........+.........|.........+.........+.........+.........+.........+.........+.........+.........+.........+.........|.........+.........+.........+.........+.........+.........+.........+.........+.........+.........|.........+.........+.........+.........+.........+.........+.........+.........+.........+.........|.........+.........+.........+.........+.........+.........+.........+.........+.........+.........|.........+.........+.........+.........+.........+......
        Cyprinus_Cluster7896.seq.Contig1     CTCGGGCTCATTTCTGTCATCTTGTCCCCTTTGAAGGGCGATGGACGGGATATCTGTCTGGCCGCCGGGTTCTTTCCCGAAGAAAAGACTATGACTTTGACTGTGGAAGGTAAAAACCCTGTGAGCCTTACCACCAGAGAAGCACCCTTGTTTAAATCGACCAAAACCTATTATTATGCTGGATTCAGTGAAGATGATAAAGTGCAAACATGCGAAATGGATGGACAAACAGCAGACAAAACTCTTGACACTGCTGAAACGACAGAAAACCCTGAAAGAATGACTCAACAGACTTGTCCAACTAGTCTTAGTGCTGATGCCTTAGAGTTCATAAACACTGGTGATCCAAAAATGAACTCCATGAATCTTCTTGTGACAGGTCTGAGAATTCTGCTTGCTAAATGTGTCGCAGTTAATGCATTGATGACTGTGAAGGCATTCATATTTTAAAAGTTCAGTTCAGCCAAATCATTGGAATAATCAAAAATTGTAACTT*TGCTCATCAAGGCTGCATTTATTTGATCAAAAATATAGGAAACATTTAATATTGTGAAATATTGTTACCACTCGAAATAACCATTTATAATATACTGTAATATATTTTAAATTATAATTTAATTCTGTGATGCAGGACTGAATTTTCAGCATCATTACTCCAGTCTTCAGTGTCACATGATCCTTCAGAAATCATTCTAATATGCTGATTTGCTGTTCATGTTCCTGTTATTATCTATGTTCAGACACTTTGTGTCATGTCTTAGAACATGTTTGATCCCTGTAAAAATCACCATTATACATTTTTGCACATTTCCATTCAAGTTTTATACAGTAGAATAGGAGCTTTTAAGTACTATTTATAACGCTCACTCATTACATTTTGTAATTAAGAAAGAACAAATTTAAATAATACTGCAAATGAGCAGTCTGTTATGGCTAACCTCCTTCAGCACCAGGACACAGTTCCCAGGTCCCACACACTGCGGCAGCTCTGCAATACGGCCCTTATTGAGGTAGGGCCTTGAAAAGCAGCGATGGTTAAAATAGATCTTGGGGCAACAGTACTTCCCATTCGCTTGACCTGTTGGTGACACAGACAAGATTAAAATAGTACCATGTTAGAGACCCACTGAGCTTTTATTAGTGTGTAAACGGCTGACAAGGATGTGAAGAAATGTTCAGATGTGTATCTAGCACTTACCCATCTCAGCCTGACTGCTGTTAATCTGTAGTTTGGTAGTATCAGGTGAGGAGTCTT
                                             --------------------------------------------------------------------------------------------------------------------------------------------------------------------------------------------------------------------------------------------------------------------------------------------------------------------------------------------------------------------------------------------------------------------------------------------------------------------------------------------------------------------------------------------------------------------------------------------------------------------------------------------------------------------------------------------------------------------------------------------------------------------------------------------------------------------------------------------------------------------------------------------------------------------------------------------------------------------------------------------------------------------------------------------------------------------------------------------------------------------------------------------------------------------------------------------------------------------------------------------------------------------------------------------------------
      gi|50741865|gb|CF662790.2|CF662790     CTCGGGCTCATTTCTGTCATCTTGTCCCCTTTGAAGGGCGATGGACGGGATATCTGTCTGGCCGCCGGGTTCTTTCCCGAAGAAAAGACTATGACTTTGACTGTGGAAGGTAAAAACCCTGTGAGCCTTACCACCAGAGAAGCACCCTTGTTTAAATCGACCAAAACCTATTATTATGCTGGATTCAGTGAAGATGATAAAGTGCAAACATGCGAAATGGATGGACAAACAGCAGACAAAACTCTTGACACTGCTGAAACGACAGAAAACCCTGAAAGAATGACTCAACAGACTTGTCCAACTAGTCTTAGTGCTGATGCCTTAGAGTTCATAAACACTGGTGATCCAAAAATGAACTCCATGAATCTTCTTGTGACAGGTCTGAGAATTCTGCTTGCTAAATGTGTCGCAGTTAATGCATTGATGACTGTGAAGGCATTCATATTTTAAAAGTTCAGTTCAGCCAAATCATTGGAATAATCAAAAATTGTAACTT*TGCTCATCAAGGCTGCATTTATTTGATCAAAAATATAGGAAACATTTAATATTGTGAAATATTATTATGATGTAAAATACAAATTT*TC*TATTTTGGTATACATT**AAGATATAATTTATTTCTGTGATGCAGGACTGAATTTTCAGCATCATTGCTCCAGTCTTCAGTGTCACATGATCCTTCAGAAATCATTCTAATATGCCGATTTLLLLLLLLLLLLLLLLLLLLLLLLLLLLLLLLLLLLLLLLLLLLLLLLLLLLLLLLLLLLLLLLLLLLLLLLLLLLLLLLLLLLLLLLLLLLLLLLLLLLLLLLLLLLLLLLLLLLLLLLLLLLLLL                                                                                                                                                                                                                                                                                                                                                                                                                                     
     gi|109278491|gb|EC391750.1|EC391750                                                                                                                                             LLLLLLLLLLLLLLLLLLLLLLLLLLLLLLLLLLLLLLLLLLLLLLLLLLLLLLLLLLLLLLLLLLLLLLLLLLLLLLLLLLLLLLLLLLLLLLLLLLLLLLLLLLLLLLLLLLLLLLLLLLLLLLLLLLLLLLLLLLLLLLLLLLLLLLLLLLLLLLLLLLLLLLLLLLLLLLLLLLLLLLLLLLLLLLLLLLLLLLLLLLLLLLLLLLLLLLLLLLLLLLLLLLLLLLLLLLLLLLLLLLLLLLLLLLLLLLLLLLLLLLLLLLLLLLLLLLLLLLLLLLLLLLLLLLLLLLLLLLLLLLLLLLLLLLLLLLLLLLLLLLLLLLLLLLLLLLLLLLLLLLLLLLLLLLLLTGTGACTTATGCTCATCAAAGATG**TTTATTTGATCAAAAATACAGAAAAAAACTAATATTGTGAAATATTGTTACCACTCGAAATAACCATTTATAATATACTGTAATATATTTTAAATTATAATTTAATTCTGTGAT*****ATTTTTTTTT*AGCATGATTACTCCAGTCTTCTGTGTCACATGATCCTTTAGAAATCATTCTGATATGCTGATTTGCTGCTCALLLLLLLLLLL                                                                                                                                                                                                                                                                                                                                                                                                                                                                                                                                                 
      gi|50743558|gb|CF661336.2|CF661336                                                                                                                                                                                                                                                                                                                                                         LLLLLLLLLLLLLLLLLLLLLLLLLLLLLLLLLLLLLLLLLLLLLLLLLLLLLLLLLLLLLLLLLLLLLLLLLLLLLLLLLLLLLLLLLLLLLLLLLLLLLLLLLLLLLLLLLLLLLLLLLLLLLLLLLLLLLLLLLLLLLLLLLLLLLLLLLLLLLLLLLLLLLLLLLLLLLLLLLLLLLLLLLLLLLLLLLLLLLLLLLLLLLLLLLLLLLLLLLLLLLLLLLLLLLLLLLLLLLLLLLLLLLLLLLLLLLLLLLLLLLLLLLLLLLLLLLLLLLLLLLLLLLLLLLLLLLLLLLLLLLLLLLLLLLLLLLLLLLLLLLLLLLLLLLTCACATGATCCTTCAGAAATCATTCTGGTATGCTGATTTGCTGTTCATGTTCCTGTTATTATCTATGTTCAGACACTTTGTGTCATGTCTTAGAACATGTTTGATCCCTGTAAAAATCACCATTATACATTTTTGCACATTTCCATTCAAGTTTTATACAGTAGAATAGGAGCTTTTAAGTACTATTTATAACGCTCACTCATTACATTTTGTAATTAAGAAAGAACAAATTTAAATAATACTGCAAATGAGCAGTCTGTTATGGCTAACCTCCTTCAGCACCAGGACACAGTTCCCAGGTCCCACACACTGCGGCAGCTCTGCAATACGGCCCTTATTGAGGTAGGGCCTTGAAAAGCAGCGATGGTTAAAATAGATCTTGGGGCAACAGTACTTCCCATTCGCTTGACCTGTTGGTGACACAGACAAGATTAAAATAGTACCATGTTAGAGACCCACTGAGCTTTTATTAGTGTGTAAACGGCTGACAAGGATGTGAAGAAATGTTCAGATGTGTATCTAGCACTTACCCATCTCAGCCTGACTGCTGTTAATCTGTAGTTTGGTAGTATCAGGTGAGGAGTCTT
      gi|13919130|gb|AU183389.1|AU183389                                                                                                                                                                                                                                                                                                                                                                                                                                                                                                                                                                                                                            LLLLLLLLLLLLLLLLLLLLLLLLLLLLLLLLLLLLLLLLLLLLLLLLLTCATTACTCCAGTCTTCAGTGTCACATGATCCTTCAGAAATCATTCTAATATGCTGATTTGGTGCTCALLLLLLLLLLLLLLLLLLLLLLLLLLLLLLLLLLLLLLLLLLLLLLLLLLLLLLLLLLLLLLLLLLLLLLLLLLLLLLLLLLLLLLLLLLLLLLLLLLLLLLLLLLLLLLLLLLLLLLLLL                                                                                                                                                                                                                                                                                                                                                                                                                                   
Putative SNPs: 696A>G

8.
                                                                                                                                                100                                                                                                 200                                                                                                 300                                                                                                 400                                                                                                 500                                                                                                 600                                                                                                 700                                                                                                 800                                                                                                 900                                                                                                 1000                                                                                                1100                                                                                                1200
                                             .........+.........+.........+.........+.........+.........+.........+.........+.........+.........|.........+.........+.........+.........+.........+.........+.........+.........+.........+.........|.........+.........+.........+.........+.........+.........+.........+.........+.........+.........|.........+.........+.........+.........+.........+.........+.........+.........+.........+.........|.........+.........+.........+.........+.........+.........+.........+.........+.........+.........|.........+.........+.........+.........+.........+.........+.........+.........+.........+.........|.........+.........+.........+.........+.........+.........+.........+.........+.........+.........|.........+.........+.........+.........+.........+.........+.........+.........+.........+.........|.........+.........+.........+.........+.........+.........+.........+.........+.........+.........|.........+.........+.........+.........+.........+.........+.........+.........+.........+.........|.........+.........+.........+.........+.........+.........+.........+.........+.........+.........|.........+.........+.........+.........+.........+.........+.........+.........+.........+.........|.........+.........+.........
        Cyprinus_Cluster7898.seq.Contig1     CGCTCGGCTGTGTGGCTGGTGATGAGGAGTCCTACTAAGTCTTCAAGGAATTGTTTGACCCCATCATTTCTGACCGTCACGGTGGCATACAAGCCCACCGACAAGCACACTACTGATCTGAACTGGGAGAACCTGAAGGGTGGTGATGACCTTGACCCCAACTACGTTATGAGCACCCATGTGCGTACCGGCCGCAGCATCAAGGGATTCACCCTGCCTACCACCAACAGCCGTGGTGAGCGTAGAGCTGTGGAGAAGCTGTCCATTGAGGCTCTGAACAGCCTGGATGGCGAGTTCAAGGGCAAGTACTACCCTCTAAAGGACATGAGTGACAAGGAACAGGAGCAGCTCATTGCTGACCACTTCCTGTTTGACAAGCCTGTGTCCCCCCTGCTGTTGGCTGCTGGCATGGCTCGCGACTGGCCTGACGCAAGAGGCATCTGGCACAATGACAACAAGACCTTCCTGGTCTGGGTGAATGAGGAGGATCACCTGCGTGTCATCTCCATGCAGAAGGGTGGCAACATGAAGGAGGTCTTCAAGAGGTTCTGCGTTGGCCTGCAGAAGATTGAGGATGTCTTCAAGAAGCATAACCACGGTTTCATGTGGAACGAGCATCTTGGTTTCATCCTGACCTGCCCCTCTAACTTGGGCACCGGCCTGCGTGGTGGTGTCCATGTCAAGCTGCCCAAACTCAGCACACATGCCAAATTTGAGGAGATCCTGACCAGACTGCGTCTTCAGAAGCGTGGCACAG*GTGGTGTGGATACTGCCTCTGTTGG*TGG*TGTGTTCGACATCTCCAACGCTGATCGTCTGGGCTCCTCCGAGGCGCAGCAAGTGCAGCTG*GTGG*TCGATGGTGTGAAGCTCATGATTGAGACGGAAAAGAAACTGGAGAAGGGCGAGTCCATCGATGACATGATCCCTGCCCAGAAGTAAAATGGCAAAAGTGCTTTTCTTTTTTTTATTTGTTCTTTTAAGCAGTCATGCCATCCTGACTTTTCCAAGAGACACTCCACCCTGCTCCCTTTTTTCCTACTTTTTTTTCTCTTTCCTTTCTTCCCTGTTGTCTTCTTTTTCCTGCACTTTTCCTTATCTTCCTGTTCCTCCTGTAACATCCTGGGATCAAACCTCCACATAGCTAGAGAACCCTAGCTATGTTGTATTCACCTTAACTTTTTTTTTGGTTGTACAAAATTAATAAACGGCCCCATGTAACAATCGAAG
                                             -----------------------------------------------------------------------------------------------------------------------------------------------------------------------------------------------------------------------------------------------------------------------------------------------------------------------------------------------------------------------------------------------------------------------------------------------------------------------------------------------------------------------------------------------------------------------------------------------------------------------------------------------------------------------------------------------------------------------------------------------------------------------------------------------------------------------------------------------------------------------------------------------------------------------------------------------------------------------------------------------------------------------------------------------------------------------------------------------------------------------------------------------------------------------------------------------------------------------------------------------------------------------------
      gi|50743495|gb|CF661276.2|CF661276     CGCTCGGCTGTGTGGCTGGTGATGAGGAGTCCTACTAAGTCTTCAAGGAATTGTTTGACCCCATCATTTCTGACCGTCACGGTGGCATACAAGCCCACCGACAAGCACACTACTGATCTGAACTGGGAGAACCTGAAGGGTGGTGATGACCTTGACCCCAACTACGTTATGAGCACCCATGTGCGTACCGGCCGCAGCATCAAGGGATTCACCCTGCCTACCACCAACAGCCGTGGTGAGCGTATAGCTGTGGAGAAGCTGTCCATTGAGGCTCTGAACAGCCTGGATGGCGAGTTCAAGGGCAAGTACTACCCTCTAAAGGACATGAGTGACAAGGAACAGGAGCAGCTCATTGCTGACCACTTCCTGTTTGACAAGCCTGTGTCCCCCCTGCTGTTGGCTGCTGGCATGGCTCGCGACTGGCCTGACGCAAGAGGCATCTGGCACAATGACAACAAGACCTTCCTGGTCTGGGTGAATGACGAGGATCACCTGCGTGTCATCTCCATGCAGAAAGGTGGCAACTTGAACGAGGTCTTCAAGAGGTTCTGCGTTGGCCTGCAGAAGATTGAGGATGTCTTCAAGAAGCATAACCACGGTTTCATGTGGAACGAGCATCTTGGTTTCATCCTGACCTGCCCCTCTAACTTGGGTACCGGCCTGCGTGGTGGTGTCCATGTCAAGCTGCCCAAACTCAGCACACATGCCAAATTTGAAGACATCCTGACCAGACTGCGTCTTCAGAAGCGTGGCACAG*GTGGTGTGGATACTGCCTCTG                                                                                                                                                                                                                                                                                                                                                                                                                                                                  
      gi|50743621|gb|CF661394.2|CF661394                                                                                                                                                                     ACTATGTTCTCAGTAGCCGTGTGCGTACTGGCCGCAGCATTAAGGGATATGCCCTGCCCCCCCACAACAGCCGTGGAGAGCGCAGAGCTGTGGAGAAGCTGTCTGTTGAAGCTCTGAACAGCTTGGATGGAGAATTCAAGGGCAAGTACTACCCCCTGAAATCCATGACTGATGCTGAGCAGGAGCAGCTGATCGCTGACCACTTCCTCTTTGACAAACCTGTCTCCCCCCTGCTGTTGGCTGCTGGTATGGCCCGCGACTGGCCCGATGCCAGAGGCATTTGGCACAATGAGAACAAGACCTTCCTGGTCTGGGTGAACGAGGAGGATCACCTGCGTGTCATTTCCATGCAGCAGGGTGGGAACATGAAGGAAGTGTTCAAGCGCTTCTGCGTTGGTCTTCAGAGGATTGAGGAGATTTTCAAGAAGCACAACCATGGATTCATGTGGAACGAGCATCTTGGTTTCATTCTGACCTGCCCCTCAAACTTGGGCACAGGCCTGCGTGGTGGTGTCCACGTCAAGCTGCCCAAGCTGAGCACACATCCCAAGTTTGAGGAGATCCTGACCAGACTGCGCCTGCAGAAGCGTGGCACAG*GTGGTGTGGACACCGCTTCCGTTGG*TGG*AGTGTTTGACATTTCCAATGCTGACCGTATTGGCTCTTCAGAGGTTGAGCAAGTGCAG*TGTGTGGGTTGATGGCGTTAAGCTGATGATTGAGATGGAGAAGAAGCTGGAGAAAGGCGAGTCCATCGACAGCATGATCCCTGCCCAGAAGTAAALLLLLLLLLLLLLLLLLLLLLLLLLLLLLLLLL                                                                                                                                                                                                                                                              
      gi|50742222|gb|CF660374.2|CF660374                                                                                                                                                                                                                    TTCACCCTGCCTACCACCAACAGCCGTGGTGAGCGTAGAGCTGTGGAGAAGCTGTCCATTGAGGCTCTGAACAGCCTGGATGGCGAGTTCAAGGGCAAGTACTACCCTCTAAAGGACATGAGTGACAAGGAACAGGAGCAGCTCATTGCTGACCACTTCCTGTTTGACAAGCCTGTGTCCCCCCTGCTGTTGGCTGCTGGCATGGCTCGTGACTGGCCTGACGCAAGAGGCATCTGGCACAATGACAACAAGACCTTCCTGGTCTGGGTGAATGAGGAGGATCACCTGCGTGTCATCTCCATGCAGAAGGGTGGCAACATGAAGGAGGTCTTCAAGAGGTTCTGCGTTGGCCTGCAGAAGATTGAGGATGTCTTCAAGAAGCATAACCACGGTTTCATGTGGAACGAGCATCTTGGTTTCATCCTGACCTGCCCCTCTAACTTGGGCACCGGCCTGCGTGGTGGTGTCCATGTCAAGCTGCCCAAACTCAGCACACATGCCAAATTTGAGGAGATCCTGACCAGACTGCGTCTTCAGAAGCGTGGCACAGNGTGGTGTGGATACTGCCTCTGTTGGNTGGGTGTGTTCGACATCTCCAACGCTGATCGTCTGGGCTCCTCCGAGGTGCAGCAGNTGCAGCTG*GTGG*TCGATGGTGTGAAGCTCATGATTGAAATGGAAAAGAAACTGGAGAAGGGCGAGTCCATCGATGACATGATCCCTGCCCAGAAGTAAAATGGCAAAAGTGCTTTTCTTTTTTTTATTTGTTCTTTTAAGCAGTCATGCCATCCTGACTTTTCCAAGAGACACTCCACCCTGCTCCCTTTTTTCCTACTTTTTTTTCTCTTTCC                                                                                                                                                                            
      gi|50744323|gb|CF662032.2|CF662032                                                                                                                                                                                                                                                                                                                                                                                                                                                                                                                                                                                                                                                                                                                 CTGCCCAAACTCAGCACACATGCCAAATTTGAGGAGATCCCGACCAGACTGCGTCTTCAGAAGCGTGGCACAG*GTGGTGTGGATACTGCCTCTGTTGG*TGG*TGTGTTCGACATCTCCAACGCTGATCGTCTGGGCTCCTCCGAGGCGCAGCAAGTGCAGCTG*GTGG*TCGATGGTGTGAAGCTCATGATTGAGACGGAAAAGAAACTGGAGAAGGGCGAGTCCATCGATGACATGAACCCTGCCCAGAAGTAAAATGGCAAAAGTGCTTTTCTTTTTTTTATTTGTTCTTTTAAGCAGTCATGCCATCCTGACTTTTCCAAGAGACACTCCACCCTGCTCCCTTTTTTCCTACTTTTTTTTCTCTTTCCTTTCTTCCCTGTTGTCTTCTTTTTCCTGCACTTTTCCTTATCTTCCTGTTCCTCCTGTAACATCCTGGGATCAAACCTCCACATAGCTAGAGAACCCTAGCTATGTTGTATTCACCTTAACTTTTTTTTTGGTTGTACAAAATTAATAAACGGCCCCATGTAACAATCGAAG

Putative SNPs: NULL

9.
                                                                                                                                                100                                                                                                 200                                                                                                 300                                                                                                 400                                                                                                 500                                                                                                 600                                                                                                 700                                                                                                 800                                                                                                 900
                                             .........+.........+.........+.........+.........+.........+.........+.........+.........+.........|.........+.........+.........+.........+.........+.........+.........+.........+.........+.........|.........+.........+.........+.........+.........+.........+.........+.........+.........+.........|.........+.........+.........+.........+.........+.........+.........+.........+.........+.........|.........+.........+.........+.........+.........+.........+.........+.........+.........+.........|.........+.........+.........+.........+.........+.........+.........+.........+.........+.........|.........+.........+.........+.........+.........+.........+.........+.........+.........+.........|.........+.........+.........+.........+.........+.........+.........+.........+.........+.........|.........+.........+.........+.........+.........+.........+.........+.........+.........+.........|.........+..
        Cyprinus_Cluster7909.seq.Contig1     AAGCAGCTGCTACTTTGTTAAACAGTCATTTACATATTTATTTTCGCTTTAGTCTCCACCATGTCACCAAATAATTCATACTTAAAGGCTTAAGTTATTTATTTTAATCTAACCTAAAACATGGCCTACCTATATATTAACTGATTCAATATTATTTTTCGGTAACATTTAACAGGTTACGTAAGTTAACATGAAATAATAGTGTCTGGATTTATTAATCTTAGTTCATGTTAATTTCAACTTTTAATAATCCTTTATAAAATCAACAGTTGTGTCTGCTAATATATTATTTAATGGAGCTAACATGAACTAACAATAAATAGTTGTCTTTGTATTAACAAACATTAACAAATAATATTAACTACTGCACCAATTAGCAATTCCACACTGTTAGTTAATGTTAACCTGCTTTAACTAAGGGTGTATTCACACCTGTCTTGTTTGGTAAGACTGAATCAAATTTAAGTTAATCTCCCCTCTTGCTGCGGATCTTTTGGGTAGGTGTGAATATAACAAATCGCATTTGGGTGCGGACCAAACAACCGTACTGAGACCCGGCTGAAGAGGTGGTCTCGGTCCACTTTCCAAACGAACTCTGGTACGGTTGAATGGACGAACCAATGAATGGATGACCTCAAACACACATGTTGTTTTGTTTACAATTGCTGGTTCACTGTACTGTGATAAAAGCTTCAACAACTATTGTGAAAATTTGATACCATCACATACCTAATGTACATACAATTTAATAGGATTATAAATAATTACATAATTAGCCTATTAAAGTTCCCCTATTATGCCTTTTTGAACATTACCTTTCATGCAGTGTGTAATGCAGCTGTATGTGAACATAAACTATCTGCAAAGTTGTGAAGCCGACAGTGCACGATAAATAAAGCTAGTCTATTATAT
                                             ------------------------------------------------------------------------------------------------------------------------------------------------------------------------------------------------------------------------------------------------------------------------------------------------------------------------------------------------------------------------------------------------------------------------------------------------------------------------------------------------------------------------------------------------------------------------------------------------------------------------------------------------------------------------------------------------------------------------------------------------------------------------------------------------------------------------------------------------------------------------------------------------------------------------------------------------
      gi|50743513|gb|CF661293.2|CF661293     AAGCAGCTGCTACTTTGTTAAACAGTCATTTACATATTTATTTTCGCTTTAGTCTCCACCATGTCACCAAATAATTCATACTTAAAGGCTTAAGTTATTTATTTTAATCTAACCTAAAACATGGCCTACCTATATATTAACTGATTCAATATTATTTTTCGGTAACATTTAACAGGTTACGTAAGTTAACATGAAATAATAGTGTCTGGATTTATTAATCTTAGTTCATGTTAATTTCAACTTTTAATAATCCTTTATAAAATCAACAGTTGTGTCTGCTAATATATTATTTAATGGAGCTAACATGAACTAACAATAAATAGTTGTCTTTGTATTAACAAACATTAACAAATAATATTAACTACTGCACCAATTAGCAATTCCACACTGTTAGTTAATGTTAACCTGCTTTAACTAAGGGTGTATTCACACCTGTCTTGTTTGGTAAGACTGAATCAAATTTAAGTTAATCTCCCCTCTTGCTGCGGATCTTTTGGGTAGGTGTGAATATAACAAATCGCATTTGGGTGCGGACCAAACAACCGTACTGAGACCCGGCTGAAGAGGTGGTCTCGGTCCACTTTCCAAACGAACTCTGGTACGGTTGAATGGACGAACCAATGAATGGATGACCTCAAACACACATGTTGTTTTGTTTACAATTGCTGGTTCACTGTACTGTGATAAAAGCTTCAACAACTATTGTGAAAATTTGATACCATCACATACCTAATGTACATACAATTTAATAGGATTATAAATAATTACATAATTAGCCTATTAAAGTTCCCCTATTATGCCTTTTTGAACATTACCTTTCATGCAGTGTGTAATGTAGCTGTATGTGAACATAAACTATCTGCAAAGTTGTGAAGCCGACAGTGCACGATAAATAAAGCTAGTCTATTATAT
      gi|50743512|gb|CA966626.2|CA966626     AAGCAGCTGCTACTTTGTTTAACAGTCATTTACATATTTATTTTCGCTTTAGTCTCCACCATGTCACCAAATAATTCATACTTAAAGGCTTAAGTTATTTATTTTAATCTAACCTAAAACATGGCCTACCTATATATTAACTGATTCAATATTATTTTTCGGTAACATTTAACAGGTTACGTAAGTTAACATGAAATAATAGTGTCTGGATTTATTAATCTTAGTTCATGTTAATTTCAACTTTTAATAATCCTTTATAAAATCAACAGTTGTGTCTGCTAATATATTATTTAATGGAGCTAACATGAACTAACAATAAATAGTTGTCTTTGTATTAACAAACATTAACAAATAATATTAACTACTGCACCAATTAGCAATTCCACACTGTTAGTTAATGTTAACCTGCTTTAACTAAGGGTGTATTCACACCTGTCTTGTTTGGTAAGACTGAATCAAATTTAAGTTAATCTCCCCTCTTGCTGCGGATCTTTTGGGTAGGTGTGAATATAACAAATCGCATTTGGGTGCGGACCAAACAACCGTACTGAGACCCGGCTGAAGAGGTGGTCTCGGTCCACTTTCCAAACGAACTCTGGTACGGTTGAATGGACGAACCAATGAATGGATGACCTCAAACACACATGTTGTTTTGTTTACAATTGCTGGTTCACTGTACTGTGATAAAAGCTTCAACAACTATTGTGAAAATTTGATACCATCACATACCTAATGTACATACAATTTAATAGGATTATAAATAATTACATAATTAGCCTATTAAAGTTCCCCTATTATGCCTTTTTGAACATTACCTT                                                                                              
      gi|50743410|gb|CF661197.2|CF661197     AAGCAGCTGCTACTTTGTTAAACAGTCATTTACATATTTATTTTCGCTTTAGTCTCCACCATGTCACCAAATAATTCATACTTAAAGACTTAAGTTATTTATTTTAATCTAACCTAAAACATGGCCTACCTATATATTAACTGATTCAATATTATTTTTCGGTAACATTTAACAGGTTACGTAAGTTAACATGAAATAATAGTGTCTGGATTTATTAATCTTAGTTCATGTTAATTTCAACTTTTAATAATCCTTTATAAAATCAACAGTTGTGTCTGCTAATATATTATTTAATGGAGCTAACATGAACTAACAATAAATAGTTGTCTTTGTATTAACAAACATTAACAAATAATATTAACTACTGCACCAATTAGCAATTCCACACTGTTAGTTAATGTTAACCTGCTTTAACTAAGGGTGTATTCACACCTGTCTTGTTTGGTAAGACTGAATCAAATTTAAGTTAATCTCCCCTCTTGCTGCGGATCTTTTGGGTCGGTGTGAATATAACAAATCGCATTTGGGTGCGGACCAAACAACCGTACTGAGACCCGGCTGAAGAGGTGGTCTCGGTCCACTTTCCAAACGAACTCTGGTACGGTTGAATGGACGAACCAATGAATGGATGACCTCAAACACACATGTTGTTTTGTTTACAATTGCTGGTTCACTGTACTGTGATAAAAGCTTCAACAACTATTGTGAAAATTTGATACCATCACATACCTAATGTACATACAATTTAATAGGATTATAAATAATTACATAATTAGCCTATTAAAGTTCCCCTATTATGCCTTTTTGAACATTACCTTTCATGCAGTGTGTAATGCAGCTGTATGTGAACATAAACTATCT                                                   
      gi|50743413|gb|CF661199.2|CF661199     AAGCAGCTGCTACTTTGTTAAACAGTCATTTACATATTTATTTTCGCTTTAGTCTCCACCATGTCACCAAATAATTCATACTTAAAGACTTAAGTTATTTATTTTAATCTAACCTAAAACATGGCCTACCTATATATTAACTGATTCAATATTATTTTTCGGTAACATTTAACAGGTTACGTAAGTTAACATGAAATAATAGTGTCTGGATTTATTAATCTTAGTTCATGTTAATTTCAACTTTTAATAATCCTTTATAAAATCAACAGTTGTGTCTGCTAATATATTATTTAATGGAGCTAACATGAACTAACAATAAATAGTTGTCTTTGTATTAACAAACATTAACAAATAATATTAACTACTGCACCAATTAGCAATTCCACACTGTTAGTTAATGTTAACCTGCTTTAACTAAGGGTGTATTCACACCTGTCTTGTTTGGTAAGACTGAATCAAATTTAAGTTAATCTCCCCTCTTGCTGCGGATCTTTTGGGTCGGTGTGAATATAACAAATCGCATTTGGGTGCGGACCAAACAACCGTACTGAGACCCGGCTGAAGAGGTGGTCTCGGTCCACTTTCCAAACGAACTCTGGTACGGTTGAATGGACGAACCAATGAATGGATGACCTCAAACACACATGTTGTTTTGTTTACAATTGCTGGTTCACTGTACTGTGATAAAAGCTTCAACAACTATTGTGAAAATTTGATACCATCACATACCTAATGTACATACAATTTAATAGGATTATAAATAATTACATAATTAGCCTATTAAAGTTCCCCTATTATGCCTTTTTGAACATTACCTTTCATGCAGTGTGTAATGCAGCTGTATGTGAACATAAACTATCTGC                                                 

Putative SNPs: 88G>A, 500A>C

10.                                                                                                                                           100                                                                                                 200                                                                                                 300                                                                                                 400                                                                                                 500                                                                                                 600                                                                                                 700                                                                                                 800
                                             .........+.........+.........+.........+.........+.........+.........+.........+.........+.........|.........+.........+.........+.........+.........+.........+.........+.........+.........+.........|.........+.........+.........+.........+.........+.........+.........+.........+.........+.........|.........+.........+.........+.........+.........+.........+.........+.........+.........+.........|.........+.........+.........+.........+.........+.........+.........+.........+.........+.........|.........+.........+.........+.........+.........+.........+.........+.........+.........+.........|.........+.........+.........+.........+.........+.........+.........+.........+.........+.........|.........+.........+.........+.........+.........+.........+.........+.........+.........+.........|.........+.........+....
        Cyprinus_Cluster7918.seq.Contig1     GGGGAGTGGCCATTACGCCGGGGGGGCTAAAGCTCTCATGTGATGAGATCTCACACAATGTTACTGTAATGCTGTTGTTATGAGCTGCTAGCAGGGTTGAAGATGAACAGGCTGATTTTACCGGTTCTGTTTGCAGTTCTCTATCAGGTGCATACATTGCCACTGCACACTGAGGAAGATGAGTATCTTTTCAAATCATGGATGTCTCAGTATAACAAAAAATATGAGATAAATGAATACTACCAGCGGCTACAGACATTCCTGGAGAACAAGAAGAAGATTGAGCACCATAATGCAGGAAACCACAAGTTTTCAATGGGACTGAATCGGTTTTCAGACATGACCTTTACTGAATTTAAAAAGTCCTACCTCCTGACAGAACCTCAGAACTGCTCCGCCACTAGAGGGAACCATGTGAGCAGTAATGGGCCTTATCCTGATATGATTGACTGGAGAACGAAAGGACACTATGTAACTGATGTCAAGAACCAGGGAGCTTGTGGTAGCTGCTGGACTTTTTCCACCACAGGCTGTCTGGAGTCTGTCACTGCTATTGCCACAGGAAAACTCCTACAACTAGCAGAGCAGCAGCTTGTTGATTGTGCACGTGCTTTCGACAATCATGGCTGCAATGGTGGCCTCCCAAGTCACGCCTTTGAGTACATCATGTACAACAAAGGTCTTATGACAGAACAAGATTACCCCTATAAGGCTATACAAGGTGAATGTAGATTCAAACCAGAGTTGGCTGCTGCCTTTGTGAAGGATGTTGTAAACATTACAAAGTATGATGAAATGGGCATGGTGGATGCTGTGGCCAGGTT
                                             --------------------------------------------------------------------------------------------------------------------------------------------------------------------------------------------------------------------------------------------------------------------------------------------------------------------------------------------------------------------------------------------------------------------------------------------------------------------------------------------------------------------------------------------------------------------------------------------------------------------------------------------------------------------------------------------------------------------------------------------------------------------------------------------------------------------------------------------------------
      gi|50733438|gb|CA967608.2|CA967608     GGGGAGTGGCCATTACGCCGGGGGGGCTAAAGCTCTCATGTGATGAGATCTCACACAATGTTACTGTAATGCTGTTGTTATGAGCTGCTAGCAGGGTTGAAGATGAACAGGCTGATTTTACCGGTTCTGTCTGCAGTTCTCTATCAGGTGCATACATTGCCACTGCACACTGAGGAAGATGAGGGTCTTTTCAAATCATGGATGTCTCAGTATAACAAAAAATATGAGATAAATGAATACTACCAGCGGCTACAGACATTCCTGGAGAACAAGAAGGAGATTGAGCACCATAATGCAGGAAACCACAAGTTTTCAATGGGACTGAATCGGTTTTCAGACATGACCTTTACTGAATTTAAAAAGTCCTACCTCCTGACAGAACCTCAGAACTGCTCCGCCACTAGAGGGAACCATGTGAGCAGTAACGGGCCTTATCCTGATATGATTGACTGGAGAACGAAAGGACACTATGTAACTGATGTCAAGAACCAGGGAGCTTGTGGTAGCTGCTGGACTTTTTCCACCACAGGCTGTCTGGAGTCTGTCACTGCT                                                                                                                                                                                                                                                                                
      gi|50733802|gb|CA967756.2|CA967756                                        LLLLGTGATGAGATCTCACATAATGTTACTGTAATGCTGTTGTTATGAGCTGCTAGCAGGGTTGAAGATGAACAGGCTGATTTTACCGGTTCTGTTTGCAGTTCTCTATCAGGTGCATACATTGCCACTGCACACTGAGGAAGATGAGTATCTTTTCAAATCATGGATGTCTCAGTATAACAAAAAATATGAGATAAATGAATACTACCAGCGGCTACAGACATTCCTGGAGAACAAGAAGAAGATTGAGCACCATAATGCAGGAAACCACAAGTTTTCAATGGGACTGAATCGGTTTTCAGACATGACCTTTACTGAATTTAAAAAGTCCTACCTCCTGACAGAACCTCAGAACTGCTCCGCCACTAGAGGGAACCATGTGAGCAGTAATGGGCCTTATCCTGATATGATTGACTGGAGAACGAAAGGACACTATGTAACTGATGTCAAGAACCAGGGAGCTTGTGGTAGCTGCTGGACTTTTTCCACCACAGGCTGTCTGGAGTCTGTCACTGCTATTGCCACAGGAAAACTCCTAC                                                                                                                                                                                                                                                          
       gi|4806255|gb|AU062371.1|AU062371                                                                                         CTGCTAGCAGGGTTGAAGATGAACACGTTGTTTTTACCGATGCTGTTTGCCGTTGTGTATCAGGTGCATACATTACCATTGCACACTGAGGAAGATGAGTATCTTTTCAAATCGTGGATGTCTCAGTATAACAAAAAATATGAGATAAATGAATACTACCAGCGACTACAGATTTTCCTGGACAACAAGAAGAAGATTGAGCGCCATAATGCAGGAAACCATAAGTTTTCAATGGGACTGAATCAGTTTTCAGACATGACATTTGCTGAATTTAAAAAGTCCTACCTCCTGACAGAACCTCAGAACTGCTCCGCCACTAGAGGGAACCATCTGAGCAGTAATGGGCCTTATCCTGATACGATTGACTGGAGAACGAAAGGAAACTATGTAACTAATGTCAAGAATCAGGGACCTTGTGGTAGCTGCTGGACTTTTTCCACCACAAGCTGTCTGGAGTCCGTCACTGCTATAGCCACAGGGAAACTCCTACAACTAGCAGAGCAGCAGCTTGTAGATTGTGCAGGTGCTTTCGACAATCATGGCTGCAATGGTGGCCTNCCAAGTCATGCTTTTGAGT                                                                                                                                                                   
      gi|50743866|gb|CF661604.2|CF661604                                                                                                                                                                                       ATGCGTATCATTACAAATCATGGATGTCTCACTATAACAAAAAATATGAGATAAATGAATAATACCAACGGCTACAGACATTCCTGGAGAACAAGAAGAAGATTGAACACCATAATGCAGGAAACCACAAGTTTTCAATGGGACTGAATCGGTTTACACACATGACCTTTACTGAATTTAAAAAGTCCTACCTCCTGACAGAACCTCAGAACTGCTCCGCCACTAGAGTGAACCATGTGAGCAGTAATGGGCCTTATCCTGATACGATTGACTGGAGAACGAAAGGACACTATGTAACTGATGTCAAGAACCAGGGAGCTTGTGGTAGCTGCTGGACTTTTTCCACCACAGGCTGTCTGGAGTCTGTCACTGCTATTGCCACAGGAAAACTCCTACAACTAGCAGAGCAGCAGCTTGTTGATTGTGCACGTGCTTTCGACAATCATGGCTGCAATGGTGGCCTCCCAAGTCACGCCTTTGAGTACATCATGTACAACAAAGGTCTTATGACAGAACAAGATTACCCCTATAAGGCTATACAAGGTGAATGTAGATTCAAACCAGAGTTGGCTGCTGCCTTTGTGAAGGATGTTGTAAACATTACAAAGTATGATGAAATGGGCATGGTGGATGCTGTGGCCAGGTT

Putative SNPs: 443T>C

11.                                                                                                                                                100                                                                                                 200                                                                                                 300                                                                                                 400                                                                                                 500                                                                                                 600                                                                                                 700                                                                                                 800                                                                                                 900
                                             .........+.........+.........+.........+.........+.........+.........+.........+.........+.........|.........+.........+.........+.........+.........+.........+.........+.........+.........+.........|.........+.........+.........+.........+.........+.........+.........+.........+.........+.........|.........+.........+.........+.........+.........+.........+.........+.........+.........+.........|.........+.........+.........+.........+.........+.........+.........+.........+.........+.........|.........+.........+.........+.........+.........+.........+.........+.........+.........+.........|.........+.........+.........+.........+.........+.........+.........+.........+.........+.........|.........+.........+.........+.........+.........+.........+.........+.........+.........+.........|.........+.........+.........+.........+.........+.........+.........+.........+.........+.........|.........+.........+.........+.........+.........+....
        Cyprinus_Cluster7921.seq.Contig1     AGCGGGGACTGTTTCCTGGTAAGAGAAAGGATATAAGTCTTTACTCGAGCAGTTGTGTACATTTCATCAAACAATCGCGCACCTGAAGAGGAATAAACATGGGGAAATCAGTCACTGTGGTTCACTGGCTTCTGC*TCACGCTGGGACTAGTTGCGGCTCAAGCAGAGAAAGCAGAGCAAGTGCTGCCAAACTGGCTTACGGGAATCATTGCCGTTGGTGTGTTCCTCTTTCTGATCTTCGTCACCTTCCTTGTAAACAAAGCCTGGTGTGAAACTCCAAGCAAACCAGAAGCAGTACCCATTGAATACGCCATGACCAATGTATCAAC********CC*GTCTTGACGCAGTCAGGAGCATCGACGACCCTAACGCATACGAGAACGCGATTGTTCACCAAACCGATGAAAAAGCGACTGAGATGTAGACTAACCTCAAGGAAACGTCCACAA****CC*AGTCAGCACGCCATGTTAACCTTATTTTTTTTTTTGTTGTTGTAATAAGTTATAATTTTAATAGCTGACACAGCTTAGCAGTGTTTTTTTTTTTTTTTTTTAATATACATTTTAATATAACATCAGACATTCAGTATATCACTTGTTGTGCAGACCTCTTTAAATAATATTTAAAAAAAATTCAATAATAGGCCCTAATATTAATAAAATCATATATGCTACCATTCAAAAATCTTGGTTTGGTAGGATTTTTAAATGTTTTTGTAGGTTGCATACATTATAATGCTATTTTAATATGCATTTTAAATGTAATTTTTTTCCTGTGATGCAAAGCTAAGTTTTACGCAGTCTTTATTACAATCTTCAGTGTCATATGTTCTGATTTGCTGTCCAAGAAACAATTATTTTCAATGTTGAAAACAGTTGTGCTGATTAATATTTTAGTAAAATATTTTATTGTTAAAACAAATGTTACCATTGCTAATCTTTTAAA
                                             ------------------------------------------------------------------------------------------------------------------------------------------------------------------------------------------------------------------------------------------------------------------------------------------------------------------------------------------------------------------------------------------------------------------------------------------------------------------------------------------------------------------------------------------------------------------------------------------------------------------------------------------------------------------------------------------------------------------------------------------------------------------------------------------------------------------------------------------------------------------------------------------------------------------------------------------------------------------------------------------
      gi|50739744|gb|CA966261.2|CA966261     AGCGGGGACTGTTTCCTGGTAAGAGAAAGGATATAAGTCTTTACTCGAGCAGTTGTGTACATTTCATCAAACAATCGCGCACCTGAAGAGGAATAAACATGGGGAAATCAGTCACTGTGGTTCACTGGCTTCTGCGTCACGCTGGGACTAGTTGCGGCTCAAGCAGAGAAAGCAGAGCAAGTGCTGCCAAACTGGCTTACGGGAATCATTGCCGTTGGTGTGTTCTTCTTTCTGATCTTCGTCACCTTCCTTGTAAACAAAGCCTGGTGTGAAACTCCAAGCAAACCAGAAGCAGTACCCATTGAATACGCCATGACCAATGTATCAAC********CC*GTCTTGACGCAGTCAGGAGCATCGACGACCCTAACGCATACGAGAATGCGATTGTTCACCAAACCGATGAAAAAGCGACTGAGATGTAGACTAATCTCAAGGAAACGTCCACAA****CC*AGTCAGCACGCCATGTTAACCTTATTTTTTT****GTTGTTGTAATAAGTTATAATTTTAATACCTG                                                                                                                                                                                                                                                                                                                                                                                                                                          
      gi|50742250|gb|CF660400.2|CF660400            ACTGTTTCCTGGTAAGAGAA*GGA*ATAAGTCTTTACTTGAGCAGTTGTGTACATTTCATCAAACAATCGCGCACCTGAAGAGGAATAAACATGGGGAAATCAGTCACCGTGGTTCACAGGCTTCTGC*TCACGCTGGGACTAGTCGCGGCTCAAGCAGAGAAAGCAGAGCAAGTGCTGCCAAACCGGCTTACGGGAATCATCGCCGTCGGTGCGTTCCTCTTTCTGATCTTCGTCACCTTCCTCGTAAACAAAGCCTGGTGTGAAACTCCAAGCAAACCAGAAGCAGTACCCATTGAATACGCCATGACCAATGTATCAAC********CC*GTCTTGACGCAGTCAGGAGCATCGACGACCCTAACGCATACAAGAACGCGATTGTTCACCAAACCGATGAAAAAGCGACTGAGATGTAGACTAACCTCAAGGAAACGTCCACAA****CC*AGTCAGCACGCCATGTTAACCTTATTTTTTTTTT*GTTGTTGTAATAAGTTATAATTTTAATAGCTGACACAGCTTAGCAGTGTTTTTTTTTTTTTTTT**AATATACATTTTAATATAACATCAGACATTCAGTATATCACTTGTTGTGCAGACCTCTTTAAATAATATTTAAAAAAAATTCAATAATAGGCCCTAATATTAATAAAATCATATATGCTACCATTCAAAAATCTTGGTTTGGTAGGAATTTTAAATGTTTTTGTAGGTTGCATACATTATAATGCTATTTTAATATGCATTTTAAATGTAATTTTTTTCCTGTGATGCAAAGCTAAGTTTTACGCAGTCTTTATTACAATCTTCAGTGTCATATGTTCTGATTTGCTGTCCAAGAAACAATTATTTTCAATGTTGAAAACAGTTGTGCTGLLL                                                           
      gi|50742085|gb|CF662956.2|CF662956                                                          LLLLLACATTTCATCAAACAATCGCGCACCTGAAGAGGAATAAACATGGGGAAATCAGTCACTGTGGTTCACTGGCTTCTGC*TCACGCTGGGACTAGTTGCGGCTCAAGCAGAGAAAGCAGAGCAAGTGCTGCCAAACTGGCTTACGGGAATCATTGCCGTTGGTGTGTTCCTCTTTCTGATCTTCGTCACCTTCCTTGTAAACAAAGCCTGGTGTGAAACTCCAAGCAAACCAGAAGCAGTACCCATTGAATACGCCATGACCAATGTATCAAC********CC*GTCTTGACGCAGTCAGGAGCATCGACGACCCTAACGCATACGAGAACGCGATTGTTCACCAAACCGATGAAAAAGCGACTGAGATGTAGACTAACCTCAAGGAAACGTCCACAA****CC*AGTCAGCACGCCATGTTAACCTTATTTTTTTTTTTGTTGTTGTAATAAGTTATAATTTTAATAGCTGACACAGCTTAGCAGTGTTTTTTTTTTTTTTTTTTAATATACATTTTAATATAACATCAGACATTCAGTATATCACTTGTTGTGCAGACCTCTTTAAATAATATTTAAAAAAAATTCAATAATAGGCCCTAATATTAATAAAATCATATATGCTACCATTCAAAAATCTTGGTTTGGTAGGATTTTTAAATGTTTTTGTAGGTTGCATACATTATAATGCTATTTTAATATGCATTTTAAATGTAATTTTTTTCCTGTGATGCAAAGCTAAGTTTTACGCAGTCTTTATTACAATCTTCAGTGTCATATGTTCTGATTTGCTGTCCAAGAAACAATTATTTTCAATGTTGAAAACAGTTGTGCTGATTAATATTTTAGTAAAATATTTTATTGTTAAAACAAATGTTACCATTGCTAATCTTTTAAA
      gi|50742231|gb|CF660383.2|CF660383                                                                                                   AAAAATGGGGAAATCAGTCACAGTGCTTCACTGGCTTGTCC*TCACTCTGGGACTAGTTGCGGCTCAAGCAGAGAAAGCTGAGCAAGCTCTGCCAAACTGGCTCACGGGAATCATCGCCGTTGCTGTTTTCCTTCTTCTCGTCTTCATCGTCTTCCTTGTGAACAAAGCCTGGTGTGAAACCCCAAGCGAACCAGAAGCAGTGCCCACCGAATACGCCATGACTAATGGATCAACATGTGAAACCAGTCTGGACGCAGTCAGGAGCAGTGAAGACCCTAAAGCATATGAGAACGCGATAGTTCACCAAACAGATGAAAAAGTGACCAAGATGTA*A*T***CTCAAGGAAACCTCCACAATCAGCCGAGTCAGCACCCCATGTTAACCTTACTTTTT*****GTTGTA**AATAAGTTATCATTTTAATAGCTGACACAGCTLLLLLLLLLLLLLLLLLLLLLLLLLLLLLLLLLLLLLLLLLLLLLLLLLLLLLLLLLLLLLLLLLLLLLLLLLLLLLLLLLLLLLLLLLLLLLLLLLLLLLLLLLLLLLLLLLLLLLLLLLLLLLLLLLLLLLLLLLLLLLLLLLLLLLLLLLLLLLLLLLLLLLLLLLLLLLLLLLLLLLLLLLLLLLLLLLLLLLLLLLLLLLLLLLLLLLLLLLLLLLLLLLLLLLLLLLLLLLLLLLLLLLLLLLLLLLLLLLLLLLLLLLLLLLLLLLLLLLLLLLLLLLLLLLLLLLLLLLLLLLLLLLLLLLLLLLLLLLLLLLLLLLLLLLLLLLLLLLLLLLLLLLLLLLLLLLLLLLLLLLLLLLLLLLLLLLLLLLLLLLLLLLLLLLLLLLLLLLLLLLLLLLLLLLLLLLLLLLL

Putative SNPs: 210T>C

12.
                                                                                                                                                100                                                                                                 200                                                                                                 300                                                                                                 400                                                                                                 500                                                                                                 600                                                                                                 700                                                                                                 800                                                                                                 900                                                                                                 1000
                                             .........+.........+.........+.........+.........+.........+.........+.........+.........+.........|.........+.........+.........+.........+.........+.........+.........+.........+.........+.........|.........+.........+.........+.........+.........+.........+.........+.........+.........+.........|.........+.........+.........+.........+.........+.........+.........+.........+.........+.........|.........+.........+.........+.........+.........+.........+.........+.........+.........+.........|.........+.........+.........+.........+.........+.........+.........+.........+.........+.........|.........+.........+.........+.........+.........+.........+.........+.........+.........+.........|.........+.........+.........+.........+.........+.........+.........+.........+.........+.........|.........+.........+.........+.........+.........+.........+.........+.........+.........+.........|.........+.........+.........+.........+.........+.........+.........+.........+.........+.........|.....
        Cyprinus_Cluster7927.seq.Contig1     AGTCTGATTCTGACCATCACAGCAGCACAGACGACGCATCAGATGCAGGTTCCATATCCATCGCTGATCTTTCCGAATCAGACTTATTTTTTGACCCGACCGAAGAGGCCTTGTGTAAAGAAGTGGTGCAGCTCATCGCACTTAACCTGACCGACGCCAAAGACGGCGTCTTGCACTGTTCCAAGCTGCTGATTCCCGAGACGCTCCTGGAGCACATCGGCCAGGAGCTGGTGCATCTGTCGGTCAGCGAGCCCTGCGGCCTTCGCGGTGCCCTCGTTGACCTCTGCGTGGAGCAGGATGGCAGCTGCGAAGCCGTGGGACAAATCTCAGTCGACCCGTACCTAGTGCCCACCTTCCAGCTCACACTCGTGCTGAGGCTCGACTCCAGGGGCTTTTGGCCAAAAA*TCCAGGGGCTTTTCGCCGGCAGATCGCCTTCGTCTCCGGTTGTTAGACGTGCACTTAAACTGAGCACTGGATTCAGAGTTATTAAGAGAAAACTGTACAGCTCTGAAGAGCTTTTGATTGAAGAATGCTGAGCTCGACTGATTGAATGTCCATGTCATGGATTTTACCAGGTTTTTAAATGAAGCTGTTCGGTCTCACAAGAGGCCTGAAGTGTTGTATGACTGTTTAAAGCAGAACGTTACCAACTCGCAGGGCATTTGTAATGCAGATGTAGGGTATATAAAAAAAAGACTTTAATACAATAAAGTGTTTGTTGCACTTTTGCTGACGTTCTAGTGAAGCAGGAGCTTTCGGGCTGCTGTTGAAATGTTTACCTCAGGTTCATGGGAACCAGATGTGGCAGCTATTTTTCATGTAGAAGACTTTGTTTTCGTTGTTTCAGTACCGATTTGTTCAAAGATGTGTAAACATGTGTCTGGATACAGTTATTGTTCTCTTGGATCAAATGGAAGAGGTGCTTTTAATTTCTTTCTCTTTTTCTTTTTTAAGCAATCATATGCATAGCCATGTATCTTATTTATTTGATATTCAAATGAAAT
                                             ---------------------------------------------------------------------------------------------------------------------------------------------------------------------------------------------------------------------------------------------------------------------------------------------------------------------------------------------------------------------------------------------------------------------------------------------------------------------------------------------------------------------------------------------------------------------------------------------------------------------------------------------------------------------------------------------------------------------------------------------------------------------------------------------------------------------------------------------------------------------------------------------------------------------------------------------------------------------------------------------------------------------------------------------
      gi|50742653|gb|CF660613.2|CF660613     AGTCTGATTCTGACCATCACAGCAGCACAGACGACGCATCAGATGCAGGTTCCATATCCATCGCTGATCTTTCCGAATCAGACTTATTTTTTGACCCGACCGAAGAGGCCTTGTGTAAAGAAGTGGTGCAGCTCATCGCACTTAACCTGACCGACGCCAAAGACGGCGTCTTGCACTGTTCCAAGCTGCTGATTCCCGAGACGCTCCTGGAGCACATCGGCCAGGAGCTGGTGCATCTGTCGGTCAGCGAGCCCTGCGGCCTTCGCGGTGCCCTCGTTGACCTCTGCGTGGAGCAGGATGGCATCTGCGAAACCGTGGGACAAATCTCAGTCGACCCGTACCTGGTGCCCACCTTCCAGCTCACACTCGTGCTGAGGCTCGACTCCCAGGGCTTTTGGCCAAAAA*TCCAGGGGCTTTTCGCCGGCAGATCGCCTTCGTCTCCGGTTGTTAGACATGCACTTAAACTGAGCACTGGATTCAGAGTTATTAAGAGAAAACTGTACAGCTCTGAAGAGCTTTTGATTGAAGAATGCTGALLLLLLLLLLLLLLLLLLLLLLLLLLLLLLLLLLLLLLLLLLLLLLLLLLLLLLLLLLLLLLLLLLLLLLLLLLLLLLLLLLLLLLLLLLLLLLLLLLLLLLLLLLLLLLLLLLLLLLLLLLLLLLLLLLLLLLLLLLLLLLLLLLLLLLLLLLLLLLLLLLLLLLLLLLLLLLLLLLLLL                                                                                                                                                                                                                                                                                               
      gi|50741145|gb|CF662254.2|CF662254                                                                                          LTTTTTCGACCCGACCGAAGAGGCCTTGTGCAAAGAAGTGGTGCAGCTCATCGCACTTAACCTGACCGACGCCAAAGACGGCGTCTTGCACTGTTCCAAGCTGCTGATTCCCGAGACGCTCCTGGAGCACATCGGCCAGGAGCTGGTGCATCTGTCGGTCAGCGAGCCCTGCGGCCTTCGCGGTGCCCTCGTTGACCTCTGCGTGGAGCAGGATGGCAGCTGCGAAGCCGTGGGACAAATCTCAGTCGACCCGTACCTAGTGCCCACCTTCCAGCTCACACTCGTGCTGAGGCTCGACTCCAGGGGCTTTTGGCCAAAAA*TCCAGGGGCTTTTCGCCGGCAGATCGCCTTCGTCTCCGGTTGTTAGACGTACACTTAAACTGAGCACTGGATTCAGAGTTATTAAGAGAAAACTGTACAGCTCTGAAGAGCTTTTGATTGAAGAATGCTGAGCTCGACTGATTGAATGTCCATGTCATGGATTTTACCAGGTTTTTAAATGAAGCTGTTCGGTCTCACAAGAGGCCTGAAGTGTTGTATGACTGTTTAAAGCAGAACGTTACCAACTCGCAGGGCATTTGTAATGCAGATGTAGGGTATATAAAAAAA*GACTTTAATACAATAAAGTGTTTGTTGCACTTTTGCTGACGTTCTAGTGAAGCAGGAGCTTTCGGGCTGCTGTTGAAATGTTTACCTCAGGTTCATGGGAACCAGATGTGGCAGCTATTTTTCATGTAGAAGACTTTGTTTTTGTTGTTCAAGTACCGATTTGTTCAAAGATGTGTAAACATGTGTCTGGATACAGTTATTGTTCTCTTGGATCAAATGGAAGAGGTGCTTTTAATTTCTTTCTCTTTTTCTTTTTTAAGCAATCATATGCATAGCCATGTATCTTATTTATTTGATATTCAAATGAAAT
      gi|50737340|gb|CA964291.2|CA964291                                                                                                                                                                                   ACTGTTCCAAGCTGCTGTCTCCCGAGACGCTCCTGGAGCACATCGGCCAGGAGCTGGTGCATCTGTCGGTCAGCGAGCCCTGCGGCCTTCGCGGTGCCCTCGTTGACCTCTGCGTGGAGCAGGATGGCAGCTGCGAAGCCGTGGGACAAATCTCAGTCGACCCGTACCTAGTGCCCACCTTCCAGCTCACACTCGTGCTGAGGCTCGACTCCAGGGGCTTTTGGCCAAAAAATCCAGGGGCTTTTCGCCGGCAGATCGCCTTCGTCTCCAGTTGTTAGACGTGCACTTAAACTGAGCACTGGATTCAGAGTTATTAAGAGAAAACTGTACAGCTCTGAAGAGCTTTTGATTGAAGAATGCTGAGCTCGACTGATTGAATGTCCATGTCATGGATTTTACCAGGTTTTTAAATGAAGCCGTTCGGTCTCACAAGAGGCCTGAAGTGTTGTATGACTGTTTAAAGCAGAACGTTACCAACTCGCAGGGCATTTGTAATGCAGATGTAGGGTTTATAAAAA***GACTTTAATACAATAAAGTGTTTGTTGCACTTTTGCTGACGTTCTAGTGAAGCAGGAGCTTTCGGGCTGCTGTTGAAAT                                                                                                                                                                                                                                       
     gi|109278594|gb|EC391803.1|EC391803                                                                                                                                                                                       LLLCAAACTCCTCATTCCCGAGACGCTCCTGGAGCACATCGGCCAGGAGCTGGTGCATCTGTCGGTCAGCGAGCCCTGCGGCCTTCGCGGTGCCCTCGTTGACCTCTGCGTGGAGCAGGACGGCAGCTGCGAAGCCGTGGGACAAATCTCAGTTGACCCATACCTAGTGCCCACCTTCCAGCTCACACTCGTCCTGAGGCTCGACTCCAGGGGCTTTTGGCCAAAAA*TCCAGGGGCTTTTCGCCGGCAGATCGCCTTCGTCTCCAGTTGTTAGACGTGCACTTAAACTGAGCACTGGATTTAGAGTTATTAAGAGAAAACTGTACAGCTCTGAAGAGCTTTTGATTGAAGAATGCTGAGCTCGACTGATTGAATGTCCATGTCATGGATTTTACCAGGTTTTTAAATGAAGCTGTTCGGTCTCACAAGAGGCCTGAAGTGTTGTATGACTGTTTAAAGCAGAACGTTACCAACTCGCAGGGCATTTGTAATGCAGATGTAGGGTATATAAAAAAAAGACTTTAATACAATAAAGTGTTTGTTGCACTTTTGCTGACGTTCTAGTGAAGCAGGAGCTTTCGGGCTGCTGTTGAAATGTTTACCTCAGGTTCATGGGAACCAGATGTGGCAGCTATTTTTCATGTAGAAGACTTTGTTTTCGTTGTTTCAGTACCGATTTGLL                                                                                                                                                 
Putative SNPs: 444G>A

13.
                                                                                                                                                100                                                                                                 200                                                                                                 300                                                                                                 400
                                             .........+.........+.........+.........+.........+.........+.........+.........+.........+.........|.........+.........+.........+.........+.........+.........+.........+.........+.........+.........|.........+.........+.........+.........+.........+.........+.........+.........+.........+.........|.........+.........+.........+.........+.........+.........+.........+.........+.........+.........|.........+.........+.........+.........+.........+.........+..
        Cyprinus_Cluster7929.seq.Contig1     CAAGAATCTTGCTGTATTCCAAAATTAGTGAAAAATGACCAACCAGGCTCTTCATGTCAACACTGACAAGTGGATTGCTGAAAATGAGAATTCATTTCTACCACCTGTATGCAACAAATTAATGTTCTTTTATCAACTGAATATTATGTATGTTGGAGGTCCAAATGCAAGGAAGGATTATCACATTGAGGAAGGGGAAGAGCTCTTTTACCAGGTGAGGGGCGACATGGTTTTGAAAGTGATAGAGGACGGCAAGCATAAAGACATACATATTCGAGAAGGAGAGATGTTCCTGCTTCCAGCACGGATTCTCCACCCTCCTCAGAGATACGCAAACACAGTACGGCTGGTCCTGGAGAGGAAGAGGCTTCTCTCTGAAACAGATGGCCTCAGGTACTTTGTGGATAATAGTACAGATGTCTTGTTTGAACGTTGGTTCTACTGTGAGAACCTGGGAACCCA
                                             ------------------------------------------------------------------------------------------------------------------------------------------------------------------------------------------------------------------------------------------------------------------------------------------------------------------------------------------------------------------------------------------------------------------------------------------------------------------------------
      gi|50733177|gb|CA967344.2|CA967344     LLLGAATCTTGCTGTATTCCAAAATTAGTGAAAAATGACCAACCAGGCTCTTCATGTCAACACTGACAAGTGGATTGCTGAAAATGAGAATTCATTTCTACCACCTGTATGCAACAAATTAATGTTCTTTTATCAACTGAATATTATGTATGTTGGAGGTCCAAATGCAAGGAAGGATTATCACATTGAGGAAGGGGAAGAGCTCTTTTACCAGGTGAGGGGCGACATGGTTTTGAAAGTGATAGAGGACGGCAAGCATAAAGACATGCACATTCGAGAAGGAGAGATGTTCCTGCTTCCAGCACGGATTCCCCACTCTCCTCAGAGATACGCAAACACAGTAGGGCTGGTCGTGGAGAGGAAGAGGCTTCGCTCTGAGACAGATGGCCTCAGGTACTTTGTGGATAATAGTACAGATGTCTTGTTTGAACGTTGGTTCTACTGTGAGAACCTGGGAACCCA
      gi|50738762|gb|CA965393.2|CA965393     CAAGAATCTTGCTGTAGTCCGAAATTAGTGAAAAATGACCAACCAGGCTCTTCATGTCAACACTGACAAGTGGATTGCTGAAAATGAGAATTCATTTCTACCACCTGTATGCAACAAATTAATGTTCTTTTATCAACTGAATATTATGTATGTTGGAGGTCCAAATGCAAGGAAGGATTATCACATTGAGGAAGGGGAAGAGCTCTTTTACCAGGTGAGGGGCGACATGGTTTTGAAAGTGATAGAGGACGGCAAGCATAAAGACATACATATTCGAGAAGGAGAGATGTTCCTGCTTCCAGCACGGATTCTCCACCCTCCTCAGAGATACGCAAACACAGTACGGCTGGTCCTGGAGAGGAAGAGGCTTCTCTCTGAAACAGATGGCCTCAGGTACTTTGTGGATAATAGTACAGATGTCTTGTTTGAACGTTGGTTCTACTGT                 
      gi|50734722|gb|CA968547.2|CA968547       AGAATCTTGCTGTATTCCAAAATTATTGAAAAATGACCAACCAGGCTCTTCATGTCAACACTGACAAGTGGATTGCTGAAAATAAAAATTCGTTTCTGGCACCTGTATGCAACAAATTAATGTTCTTTTATCAACTGAATATTATGTATGTTGGAGGTCCAAATGCAAGGAAGGATTATCACATTGAGGAAGGGGAAAAGCTCTTTTACCACGTGAGGGGCGACATGGTTTTGTAAGTGATACAGGACGGCAAGCATAAAAACATACALLL                                                                                                                                                                                             
      gi|50734623|gb|CA968457.2|CA968457                                                                            GGATTGCTGAAAATAAGAATTCTTTTTTACCACCTGTATGCAACAAATTAATGTTCTTTTATCAACTGAATATAATATATG                                                                                                                                                                                                                                                                                                                      

Putative SNPs: 86G>A

14.
                                                                                                                                                100                                                                                                 200                                                                                                 300                                                                                                 400                                                                                                 500                                                                                                 600
                                             .........+.........+.........+.........+.........+.........+.........+.........+.........+.........|.........+.........+.........+.........+.........+.........+.........+.........+.........+.........|.........+.........+.........+.........+.........+.........+.........+.........+.........+.........|.........+.........+.........+.........+.........+.........+.........+.........+.........+.........|.........+.........+.........+.........+.........+.........+.........+.........+.........+.........|.........+.........+.........+.........+.........+.........+.........+.........+.........+.........|.........+.........+.........+.........+.........+.........+.........+.........+....
        Cyprinus_Cluster7933.seq.Contig1     TAAAACTCCCTGCTGCACACTTTGTCTCTTACAGCCAGAAAACCTTGTGAAGCTGGTGGGAATGTCTGAGAGAGTTGTGCTGCATTACTTCAATGGCAGAGGAAAGATG*GAGGCGGTGCGCTGGCTGCTGGCTGCAGCTGGAGTCCAGTTTGAGGAAGTGTTTTTGACCAAAAGGGAGGAGTATGAAAAACTGCTGAATGATGGAGCCCTGATGTTTCAGCAGGTGCCTTTGGTGGAAATAGACGGGATGCAGCTCGTGCAGTCAAAGGCCATCTTGAACTACATCGCTGGAAAATACAGTCTTTACGGAAAAGATCTTAAAGAACGGGCTATGATCGACATGTATTCAGAGGGAGTCAGTGATCTCATGGATTTGGTTATAATGTATCCTTTGACACCACCTGAAAACAAACAGAAATACCTCAGTAATATAGAGCAAAAGGCCAAAGAT*CGCTTTCTTCCCGTGTTTGAAAAGGGTCTGGGGAACTCTCAGTTCCTTGTGGGAAACCAGTTGAGCCATGCTGACGTTCACCTTCTTGAAGTCACTCTGATGCTGCAGGAGTTACTCCCTACAATACTTTCACGCTTTCCCAAAATCCAGGCGTTTCAAGAGAAGATGAAGGCCTTACCAACGATCAGCAAGTTCCTCCAGCCGGGCAGCGCAAGAAAACCCCCACCCCAT
                                             ------------------------------------------------------------------------------------------------------------------------------------------------------------------------------------------------------------------------------------------------------------------------------------------------------------------------------------------------------------------------------------------------------------------------------------------------------------------------------------------------------------------------------------------------------------------------------------------------------------------------------------------------------------------------------------------------------------
      gi|50742372|gb|CA966895.2|CA966895     TAAAACTCCCTGCTGCACACTTTGTCTCTTACAGCCAGAAAACCTTGTGAAGCTGGTGGGAATGTCTGAGAGAGTTGTGCTGCATTACTTCAATGGCAGAGGAAAGATG*GAGGCGGTGCGCTGGCTGCTGGCTGCAGCTGGAGTCCAGTTTGAGGAAGTGTTTTTGACCAAAAGGGAGGAGTATGAAAAACTGCTGAATGATGGAGCCCTGATGTTTCAGCAGGTGCCTTTGGTGGAAATAGACGGGATGCAGCTCGTGCAGTCAAAGGCCATCTTGAACTACATCGCTGGAAAATACAGTCTTTACGGAAAAGATCTTAAAGAACGGGCTATGATCGACATGTATTCAGAGGGAGTCAGTGATCTCATGGATTTGGTTATAATGTATCCTTTGACACCACCTGAAAACAAACAGAAATACCTCAGTAATATAGAGCAAAAGGCCAAAGAT*CGCTTTCTTCCCGTGTTTGAAAAGGGTCTGGGGAACTCTCAGTTCCTTGTGGGAAACCAGTTGAGCCATGCTGACGTTCACCTTCTTGAAGTCACTCTGATGCTGCAGGAGTTACTCCCTACAATACTTTCACGCTTTCCCAAAATCCAGGCGTTTCAAGAGAAGATGAAGGCCTTACCAACGATCAGCAAGTTCCTCCAGCCGGGCAGCGCAAGAAAACCCCCACCCCAT
      gi|50733186|gb|CA967353.2|CA967353                               LLLLACAGCCAGAAAACCTTGTGAAGCTGGTGGGAATGTCTGAGAGAGTTGTGCTGCATTACTTCAATGGCAGAGGAAAGATG*GAGGCGGTGCGCTGGCTGCTGGCTGCAGCTGGAGTCCAGTTTGAGGAAGTGTTTTTGACCAAAAGGGAGGAGTATGAAAAACTGCTGAATGATGGAGCCCTGATGTTTCAGCAGATGCCTTTGGTTGAAATAGACGGGATGCAGCTCGTGCAGTCAAAGGCCATCTTGAACTACATCGCTGGAAAATACAGTCTTTACGGAAAAGACCTTAAAGAACGGGCTATGATCGACATGTATTCAGAGGGAGTCAGTGATCTCATGGATTTGGTTATAATGTATCCTTTGACACCACCTGAAAACAAACAGAAATACCTCAGTAATATAGAGCAAAAGGCCAAAGAT*CGCTTTCTTCCCGTGTTTGAAAAGGGTCTGGGGAACTCTCAGTTCCTTGTGGGAAACCAGTTGAGCCGTGCTGACGTTCACCTTCTTGAAGTCACTCTGATGCTGCAGGAGTTACTCCCTACAATACTTTCACGCTTTCCCAAAATCCAGGCGTTTC                                                                          
      gi|50744213|gb|CF661931.2|CF661931                                               LLLLLLLLLLLLLLLLLLLATGTCTGACAAAGTTGTGTTGCATTACTTCAATGGAAGAGGAAAGATG*GAGTCGATCCGATGGCTGCTGGCTGCAGCTGGAGTCCAGTTCGAGGAAGTGTTTTTGACCAAAAGGGAGCAGTATGAAAAACTGCTCAGTGATGGAGCCCTGATGTTTCAGCAGGTGCCTTTGGTGGAAATAGACGGGATGCAGCTCGTGCAGTCAAAGGCCATCTTGAATTACATTGCTGGAAAATACAATCTATATGGAAAAGACCTTAAAGAACGGGCTATGATCGACATGTATTCAGAGGGTGCCAGTGATCTAACGGATTTGATTATTATGTATCCTTTCAAACCAGCTGAACACAAACAGACACACCTCAGTACTATAGAGCAAAAGGCCAAAGATTCGCTTTCTTCCTGTGTTTGAAAAGGGTTTTGCAGACTCTCATTTCCTGGTGGGAAACCAGCTGAACCGAGCCGACGTTCACCTTCTTGAAGTCACTCTGATGCTGCAGGAATTGCTCCCTACCATACTTTCAACCTTTCCCAAAATCCAGGCGTTTCA                                                                         
      gi|89500060|gb|DY655856.1|DY655856                                                                                                     CAGAAGAAAGATGTGAGGCGGTGCGCTGGCTGCTGGCTGCAGCTGGAGTCCAGTTTGAGGAAGTGTTTTTGACCAAAAGGGAGGAGTATGAAAAACTGCTGAATGATGGAGCCCTGATGTTTCAGCAGGTGCCTTTGGTGGAAATAGACGGGATGCAGCTCGTGCAGTCAAAGGCCATCTTGAACTACATCGCTGGAAAATACAGTCTTTACGGAAAAGATCTTAAAGAACGGGCTATGATCGACATGTATTCAGAGGGAGTCAGTGATCTCATGGATTTGGTTATAATGTATCCTTTGACACCACCTGAAA                                                                                                                                                                                                                                                                                    

Putative SNPs: 317T>C

15.                                                                                                                                            100                                                                                                 200                                                                                                 300                                                                                                 400                                                                                                 500                                                                                                 600                                                                                                 700
                                             .........+.........+.........+.........+.........+.........+.........+.........+.........+.........|.........+.........+.........+.........+.........+.........+.........+.........+.........+.........|.........+.........+.........+.........+.........+.........+.........+.........+.........+.........|.........+.........+.........+.........+.........+.........+.........+.........+.........+.........|.........+.........+.........+.........+.........+.........+.........+.........+.........+.........|.........+.........+.........+.........+.........+.........+.........+.........+.........+.........|.........+.........+.........+.........+.........+.........+.........+.........+.........+.........|.........+....
        Cyprinus_Cluster7943.seq.Contig1     CGGGCCAGCAATGTAGCGCAGGGGAAGAGTCGTCGTCAAACTACTATGTTTGAGTGCAGCACACGCTTTATCAGTACTAACAAGTACATCTTATTGAACATAATTTGAATGCCTTCGGCAGAATTCAAATGAGCCATTTTAATCTAGATTAATCTAGATTAATTCCAAGATTACAGTGAGATTAATCTAGATTAAAAAAAATAATCTATGCCCACCACTAAAAAAAATACATTTAAATTTATAATAATAACCATAAAAATATAGTAAAACTATATTACATAATTGTAATCTAAAATTATATATATATTAGTGGTGGGCCGTTATCGGCGTTAACGTGCTGCGTTAACGTGAGACTCTTATCGGGCGATAAAAAAAATATCACCGTTAATCTATTCTCAAAGTTGGGTTGGGAGCTGGGTCTATACTACGCAAGCTATGATGACTTTCGCCGTGATAGTTTAGCGCGGATGTATACCTAGACTAATTGCACTGT*AGGGGGCGAGAACGAGTCTTCGAACCTGTGTGTATTAGTGATGCGCGGGTCGACTCATAACCCGCGGACCCCGCGGGGTTGGGGCGGGTAAAGAAATTGTCACTTTATTTGCGGGGCGGGTTGGGGTGGGTAATAAAAAAAACAAAAAAAACATACGTTGTAGTGTTGGGCGATATGGTCATTTTTTCAAATCAGATCAGATCGACGATACACAATATTA
                                             ------------------------------------------------------------------------------------------------------------------------------------------------------------------------------------------------------------------------------------------------------------------------------------------------------------------------------------------------------------------------------------------------------------------------------------------------------------------------------------------------------------------------------------------------------------------------------------------------------------------------------------------------------------------------------------------------------------------------------------------
      gi|50743531|gb|CF661310.2|CF661310     CGGGCCAGCAATGTAGCGCAGGGGAAGAGTCGTCGTCAAACTACTATGTTTGAGTGCAGCACANGCTTTATCAGTACTAACAAGTACATCTTATTGAACATAATTTGAATGCCTTCGGCAGAATTCAAATGAGCCATTTTAATCTAGATTAATCTAGATTAATTCCAAGATTACAGTGAGATTAATCTAGATTAAAAAAAATAATCTATGCCCACCACTAAAAAAAATACATTTAAATTTATAATAATAACCATAAAAATATAGTAAAACTATATTACATAATTGTAATCTAAAATTATATATATATTAGTGGTGGGCCGTTATCGGCGTTAACGTGCTGCGTTAACGTGAGACTCTTATCGGGCGATAAAAAAAATATCACCGTTAATCTATTCTCAAAGTTGGGTTGGGAGCTGGGTCTATACTACGCAAGCTATGATGACTTTCGCCGTGATAGTTTAGCGCGGATGTATACCTAGACTAATTGCACTGT*AGGGGGCGAGAACGAGTCTTCGAACCTGTGTGTATTAGTGATGCGCGGGTCGACTCATAACCCGCGGACCCCGCGGGGTTGGGGCGGGTAAAGAAATTGTCACTTTATTTGCGGGGCGGGTTGGGGTGGGTAAT                                                                                      
      gi|50743476|gb|CF661259.2|CF661259     CGGGCCAGCAATGTAGCGCAGGGGAAGAGTCGTCGTCAA*CTACT**GTTTGAGTGCAGCACA*GCTTTATCAGTACTAACAAGTACATCTTATTGAACATAATTTGAATGCCTTCGGCAGAATTCAAATGAGCCATTTTAATCTAGATTAATCTAGATTAATTCCAAGATTACAGTGAGATTCATCTAGATTAAAAAAAATAATCTATGCCCACCACTAAAAAAAATACATTTAAATTTATAATAATAACTATAAAAATATAGTAAAACTATATTACATAATTGTAATGTGAAATT*TATATATATTAGTGGTGGGCCGTTATCGGCGTTAACGTGCTGCGTTAACGTGAGACTCTTATCGGGCGATAAAAAAAATATCACCGTTAATCTATTCTCAAAGTTGGGTTGGGAGCTGGGTCTATACTACGCAAGCTTTGATGACTTTCGCCGTGATAGTTTAGCGCGGATGTATACCTAGACTAATTGCACTGT*AGGGGGCGAGAACGAGTCTTCGAACCTGTGTGTATTAGTGATGCGCGGGTCGTCTCATAACCCGCGGACACCGCGGGGTTGGGGCGGGTAAAGAAATTGTCACTTTATTTGCGGGGCGGGTTGGGGTGGGTAATAAAAAAAACAAAAAAAACATACGTTGTAGTGTTGGGCGATATGGTCATTTTTTCAAATCAGATCAGATCGACGATACACAATATTA
      gi|50743532|gb|CF661311.2|CF661311                     CGCAGGGGAAGAGTCGTCGTCAAACTACTATGTTTGAGTGCAGCACACGCTTTATCAGTACTAACAAGTACATCTTATTGAACATAATTTGAATGCCTTCGGCAGAATTCAAATGAGCCATTTTAATCTAGATTAATCTAGATTAATTCCAAGATTACAGTGAGATTAATCTAGATTAAAAAAAATAATCTATGCCCACCACTAAAAAAAATACATTTAAATTTATAATAATAACCATAAAAATATAGTAAAACTATATTACATAATTGTAATCTAAAATTATATATATATTAGTGGTGGGCCGTTATCGGCGTTAACGTGCTGCGTTAACGTGAGACTCTTATCGGGCGATAAAAAAAATATCACCGTTAATCTATTCTCAAAGTTGGGTTGGGAGCTGGGTCTATACTACGCAAGCTATGATGACTTTCGCCGTGATAGTTTAGCGCGGATGTATACCTAGACTAATTGCACTGT*AGGGGGCGAGAACGAGTCTTCGAACCTGTGTGTATTAGTGATGCGCGGGTCGACTCATAACCCGCGGACCCCGCGGGGTTGGGGCGGGTAAAGAAATTGTCACTTTATTTGCGGGGCGGGTTGGGGTGGGTAAT                                                                                      
      gi|50743439|gb|CF661223.2|CF661223                                                                                                                                                                                                                                                                                    ATATTACATAATTGTAATGTGAAATT*TATATATATTAGTGGTGGGCCGTTATCGGCGTTAACGTGCTGCGTTAACGTGAGACTCTTATCGGGCGATAAAAAAAATATCGCCGTTAATCTATTCTCAAAGATGGGATGGGAGCTGGGACTATACTACGCAAGCCTTGATGACTTTCGCCGTGATAGTTTAGCGCGGATGTACACCTGGACTAATTGCACTGTCAGGGGGCCAGAACTAGTCTTCTAACCTGCGTGTATTAGTGATGCGCGGGTCTTCTCATAACCCCCGGAC                                                                                                                                                       
 
Putative SNPs: 290C>G, 292A>G, 436A>T, 547A>T

16.
                                                                                                                                                100                                                                                                 200                                                                                                 300                                                                                                 400                                                                                                 500                                                                                                 600                                                                                                 700                                                                                                 800                                                                                                 900
                                             .........+.........+.........+.........+.........+.........+.........+.........+.........+.........|.........+.........+.........+.........+.........+.........+.........+.........+.........+.........|.........+.........+.........+.........+.........+.........+.........+.........+.........+.........|.........+.........+.........+.........+.........+.........+.........+.........+.........+.........|.........+.........+.........+.........+.........+.........+.........+.........+.........+.........|.........+.........+.........+.........+.........+.........+.........+.........+.........+.........|.........+.........+.........+.........+.........+.........+.........+.........+.........+.........|.........+.........+.........+.........+.........+.........+.........+.........+.........+.........|.........+.........+.........+.........+.........+.........+.........+.........+.........+.........|.........+.........+.........+.........+.........+.
        Cyprinus_Cluster7944.seq.Contig1     TCCGGGGACAAAATGCGTGAATGTATTTCCATGCACGTTGGCCAAGCCGGAGCCCAGATGGGCAATGCATGCTGGGAGTTGTATTGCCTGGAGCATGGGATCCAGCCAGATGGTCAGATGCTCAGTGACAAAACCATTGGAGGTGGAGATGACTCCTTCAACACCTTCTTCAGTGAGACTGGAGCTGGAAAACATGTCCCAAGAGCAGTCTTTGTTGATCTGGAGC*CCACTGTCATTGATGAGGTGCGCACAGGTACCTACCGCCAGCTGTTCCACCCTGAGCAGTTGATCACTGGTAAGGAAGATGCTGCCAACAACTACGCCCGTGGGCACTACACCATTGGCAAGGAGATCATTGACCTGGTGCTGGACAGGACTCGCAAACTGGCTGATCAGTGCACTGGGCTCCAGGGCTTCCTGATCTTCCACAGTTTTGGTGGTGACACTGGCTCTGGGTTCACCTCTCTCCTAATGGAACGGCTCTCTGTCGACTACGGGAAGAAGTCAAAACTT*GAGTTCGCTG*TCTATCCAGCTCCTCAAGTGTCCACTGCAGT*GGTGG*AGCCCTACAACTCCATTCTTACCACCCACACCACCCTCGAGCACTCCGACTGTGCCTTCATGGTAGACAATGAGGCCATCTACGATATCTGCCGTAGAAACCTCGACATCGAGCGTCCCACCTACACAAACCCCAACAGGCTGATCGGGCAGATTGTTTCCTCCATCACAGCATCCCTGCGTTTCGATGGAGCCCTGAATGTAGATCTGACCGAGTTCCAAACCAACTTGGTCCCCTATCCACGTATCCACTTCCCTCTGGCCACCTACGCCCCAGTGATCTCCGCAGAGAAGGCCTACCATGAGCAGCTGTCCGTAGCTGACATCACCAACGCTTGCTTCGAGCCAGCCAATCAGATGGTGAAATGTGACCCTCGTCACGGCAAGT
                                             ---------------------------------------------------------------------------------------------------------------------------------------------------------------------------------------------------------------------------------------------------------------------------------------------------------------------------------------------------------------------------------------------------------------------------------------------------------------------------------------------------------------------------------------------------------------------------------------------------------------------------------------------------------------------------------------------------------------------------------------------------------------------------------------------------------------------------------------------------------------------------------------------------------------------------------------------------------------------------------------
      gi|50734161|gb|CA968032.2|CA968032     TCCGGGGACAAAATGCGTGAATGTATTTCCATGCACGTTGGCCAAGCCGGAGCCCAGATGGGCAATGCATGCTGGGAGTTGTATTGCCTGGAGCATGGGATCCAGCCAGATGGTCAGATGCTCAGTGACAAAACCATTGGAGGTGGAGATGACTCCTTCAACACCTTCTTCAGTGAGACTGGAGCTGGAAAACATGTTCCAAGAGCAGTCTTTGTTGATCTGGAGC*CCACTGTCATTGACGAGGTGCGCACAGGTACCTACCGCCAGCTGTTCCACCCTGAGCAGTTGATCACTGGTAAGGAAGATGCTGCCAACAACTACGCTCGTGGGCACTACACCATTGGGAAGGAGATCATTGACCTGGTGCTGGACAGGACTCGCAAACTGGCTGATCAGTGCACTGGGCTCCAGGGCTTCCTGATCTTTCACAGTTTTGGTGGTGGCACTGGCTCTGGGTTCACCTCTCTCCTAATGGAACGGCTCTCTGTTGACTACGGAAAGAAGTCTAAACTT*GAGTTTGCGG*TCTATCCAGCTCCTCAAGTGTCCACTGCAGT*GGTGG*AGCCCTACAACTCCATTCTTACCACCCACACCACCCTCGAGCACTCCGACTGTGCCTTCATGGTAGACAATG                                                                                                                                                                                                                                                                                                                           
      gi|22022021|gb|AU279289.1|AU279289                                                                                                               LLLLLLLLLLLLLLLLLLLLLLLLLLLLLLLLLLLLLLLLLGATGACTCCTTCAACACCTTCTTCAGTGAGACTGGTGCTGGAAAACATGTCCCAAGAGCAGTCTTTGTTGACCTGGAGC*CCACTGTCATTATTGAGGTGCGCACAGGTACCTACCGCCAGCTGTTCCACCCTGAGCAGTTGATCACTGGTAAGGAAGATGCTGCCAACAACTACGCCCGTGGGCACTACACCATTGGCAAGGAGATCATTGACCTGGTGCTGGACAGGACTCGCAAACTGGCTGATCAGTGCACTGGGCTCCAGGGCTTCCTGATGTTCCACAGTTTTGGTGGTGGTACCGGCTCTGGGTTCACCTCTCTCCTAATGGAACGGCTCTCTGTCGACTACGGGAAGAAGTCAAAACTT*GAGTT*GCTG*TCTATCCAGCTCCTCAAGTATCCACTGCAGTTGGTGGGAGCCCT*CAACT                                                                                                                                                                                                                                                                                                                                                                                       
      gi|50736583|gb|CA970089.2|CA970089                                                                                                                                                                                            LLLLLLLLLLLTGTCCCAAGAGCAGTCTTTGTCGATCTGGAGCTCCACTGTCATTGATGAGGTGCGCACAGGTACCTACCGCCAGCTGTTCCACCCTGAGCAGTTGATCACTGGTAAGGAAGACGCTGCCAACAACTACGCCCGTGGGCACTACACCATTGGCAAGGAGATCATTGACCTGGTGCTGGACAGGACTCGCAAACTGGCTGATCAGTGCACTGGGCTCCAGGGCTTCCTGATCTTCCACAGTTTTGGTGGTGACACTGGCTCTGGGTTCACCTCTCTCCTAATGGAACGGCTCTCTGTCGACTACGGGAAGAAGTCAAAACTT*GAGTTCGCTG*TCTATCCAGCTCCTCAAGTGTCCACTGCAGT*GGTGG*AGCCCTACAACTCCATCCTTACCACCCACACCACCCTCGAGCACTCCGACTGTGCCTTCATGGTGGACAACGAGGCCATCTACGATATCTGCCGTAGAAACCTCGACATCGAGCGCCCCACCTACACAAACCTCAACAGGTTGATCGGGCAGATCGTTTCCTCCATCACAGCATCCCTGCGTTTCGATGGAGCTCTGAATG                                                                                                                                                                                          
       gi|4527040|gb|AU052105.1|AU052105                                                                                                                                                                                                                                                                                                                                                                                                                                                                                          CTAATGGACGGGCTCTCTGTTGACTACGGAAAGAAGTCTAAACTTTGAGTTTNCGGGTCTATCCAGCTCNTCAAGTGTCCACTGCAGT*GGTGG*AGCCCTACAACTCCATTCTTACCNCCCNCACCACCCTCGAGCACTCCGACTGTGCCTTCATGGTAGACAATGAGGCCATCTACGATATCTGCCGTAGAAACCTCGACATCGAGCGTCCCACCTACACAAACCCCAACAGGCTGATCGGGCAGATTGTTTCCTCCATCACAGCATCCCTGCGTTTCGATGGAGCCCTGAATGTAGATCTGACCGAGTTCCAAACCAACTTGGTCCCCTATCCACGTATCCACTTCCCTCTGGCCACCTACGCCCCAGTGATCTCCGCAGAGAAGGCCTACCATGAGCAGCTGTCCGTAGCTGACATCACCAACGCTTGCTTCGAGCCAGCCAATCAGATGGTGAAATGTGACCCTCGTCACGGCAAGT

Putative SNPs: 490T>C, 499A>G, 508T>A, 524G>T

17.
                                                                                                                                                100                                                                                                 200                                                                                                 300                                                                                                 400                                                                                                 500                                                                                                 600
                                             .........+.........+.........+.........+.........+.........+.........+.........+.........+.........|.........+.........+.........+.........+.........+.........+.........+.........+.........+.........|.........+.........+.........+.........+.........+.........+.........+.........+.........+.........|.........+.........+.........+.........+.........+.........+.........+.........+.........+.........|.........+.........+.........+.........+.........+.........+.........+.........+.........+.........|.........+.........+.........+.........+.........+.........+.........+.........+.........+.........|.........+.........+.........+.....
        Cyprinus_Cluster7947.seq.Contig1     TGGGCTGAAGTCACGACTTGAGTACATTGTCTTGTTTTGTTTGTACCCTGCAGTTTTGAGTCATCATGGACTTTTTTAAAGGCCTTCAGACGATACTTACCATGTATTTTTTAGCATGCGCTTATGGAGACATCATGAAAATAGACACCACCGGTGCTTCAGAGGCAACAGCAAAACAAGACAAATTAACCATTAAGGGGGTTGAAGCCTCTAAAAAACTGGCTGAGCATGATCTGGCCCGGGTGGAGAAATACAAGAACATGATCACTAAAGTTGGCAAAGCAAAAAAGATGGATCCGGCTGTGATTGCTGCTATGATATCCAGAGAGTCCAGAGCTGGAGCCGTCCTGAAGAATGGATGGGAACCCGCA*GGCAATGGCTTTGGCCTTATGCAGGTTGACAAACGCTACCACACTCCGGGTGGTGCATGGGACAGTGAGCAGCATGTCACACAAGCTACAGAGATACTCATTGGCTTCATTAAAGAAATTAAAGTAAATTTTCCCAAGTGGACACAAGAGCAATGCTTTAAAGGGGGAATAGCAGCCTATAACAAAGGTGTGAGTAGAGTCACTTCGTATGAGAATATCGATGTCAAAACCACAGGACTAGATTACTCCAGTGATGTTGTTGC
                                             -----------------------------------------------------------------------------------------------------------------------------------------------------------------------------------------------------------------------------------------------------------------------------------------------------------------------------------------------------------------------------------------------------------------------------------------------------------------------------------------------------------------------------------------------------------------------------------------------------------------------------------------------------------
      gi|50736376|gb|CA969926.2|CA969926     TGGGCTGAAGTCACGACTTGAGTACATTGTCTTGTTTTGTTTGTACCCTGCAGTTTTGAGTCATCATGGACTTTTTTAAAGGCCTTCAGACGATACTTACCATGTATTTTTTAGCATGCGCTTATGGAGACATCATGAAAATAGACACCACCGGTGCATCAGAGGTGACAGCAAAACAGGACAAATTAACCGTAAAGGGTGTCGAGGCTTCCAATAAACTGGCTGAGCATGATCTGGCCCGAATGGAGCAGTATAAGAGTAAGATCATCAAAGTTGGCAGAGCAAAGCAGATGGACCCGGCTGTGATTGCTGCCATCATATCCAGAGAGTCCAGAGCCGGAGCTGCTCTAAAGGATGGATGGGGCGAC*CATGGCAATGGCTTTGGCCTCATGCAGGTTGACAAACGCTACCACAAGCTGGAAGGGACATGGGACAGTGAGGAACATCTCACACAAGGGACTGAGATACTCATTGGCTCTATAAATGGCATCAGAGCAAAGTTTCCCCAGTGGACAAAAGAGCAATGGTTTAAAGGGGGAATATCAGCCTACAAC                                                                                
      gi|50736374|gb|CA969924.2|CA969924                                                                                    LLLLLLLLLLLLLLLLLLLLLLLLLLLLLLLLLLLLLLLLLLTTATGGAGACATCGTGAAAATAGACACCACCGGTGCTTCAGAGGCAACAGCAAAACAAGACAAATTAACCATTAAGGGGGTGGAAGCCTCTAAAAAACTGGCTGAGCATGATCTGGCCCGGGTGGAGAAATACAAGAACATGATCACTAAAGTTGGCAAAGCAAAGAAGATGGATCCGGCTGTGATTGCTGCTATGATATCCAGAGAGTCCAGAGCTGGAGCCGTCCTGAAGAATGGATGGGAACCCGCA*GGCAATGGTTTTGGCCTTATGCAGGTTGACAAACGCTACCACAGTCCGGTTGGTGCATGGGACAGTGAGCAGCATGTCACACAAGCTACAGAGATACTCATTGGCTTCATTAAAGAAATTAAAGTAAATTTTCCCAAGTGGACACAAGAGCAATGCTTTAAAGGGGGAA                                                                                              
      gi|50739033|gb|CA965584.2|CA965584                                                                                                 LLLLLLLLLLLLLLLLLLLLLLLLLLLLLTTATGGAGACATCATGAAAATAGACACCACCGGTGCTTCAGAGGCAACAGCAAAACAAGACAAATTAACCATTAAGGGGGTTGAAGCCTCTAAAAAACTGGCTGAGCATGATCTGGCCCGGGTGGAGAAATACAAGAACATGATCACTAAAGTTGGCAAAGCAAAAAAGATGGATCCGGCTGTGATTGCTGCTATGATATCCAGAGAGTCCAGAGCTGGAGCCGTCCTGAAGAATGGATGGGAACCCGCA*GGCAATGGCTTTGGCCTTATG                                                                                                                                                                                                                                                  
      gi|50738857|gb|CA965489.2|CA965489                                                                                                    LLLLLLLLLLLLLLLLLLLLLLLLLLTTATGGAGACATCATGAAAATAGACACCACCGGTGCTTCAGAGGCAACAGCAAAACAAGACAAGTTAACCATTAAGGGGGTTGAAGCCTCTAAAAAACTGGCTGAGCATGGTCTGGCCCGGGTGGAGAAATACAAGAACATGATCACTAAAGTTGGCAAAGCAAAAAAGATGGATCCGGCTGTGATTGCTGCTATGATATCCAGAGAGTCCAGAGCTGGAGCCGTCCTGAAGAATGGATGGGAACCCGCA*GGCAATGGTTTTGGCCTTATGCAGGTTGACAAACGCTACCACACTCCGGGTGGTGCATGGGACAGTGAGCAGCATGTCACACAAGCTACAGAGATACTCATTGGCTTCATTAAAGAAATTAAAGTAAATTTTCCCAAGTGGACACAAGAGCAATGCTTTAAAGGGGGAATAGCAGCCTATAACAAAGGTGTGAGTAGAGTCACTTCGTATGAGAATATCGATGTCAAAACCACAGGACTAGATTACTCCAGTGATGTTGTTGC

Putative SNPs: 287G>A, 381C>T

18.                                                                                                                                             100                                                                                                 200                                                                                                 300                                                                                                 400                                                                                                 500                                                                                                 600                                                                                                 700
                                             .........+.........+.........+.........+.........+.........+.........+.........+.........+.........|.........+.........+.........+.........+.........+.........+.........+.........+.........+.........|.........+.........+.........+.........+.........+.........+.........+.........+.........+.........|.........+.........+.........+.........+.........+.........+.........+.........+.........+.........|.........+.........+.........+.........+.........+.........+.........+.........+.........+.........|.........+.........+.........+.........+.........+.........+.........+.........+.........+.........|.........+.........+.........+.........+.........+.........+.........+.........+.........+.........|.........+.........+.....
        Cyprinus_Cluster7953.seq.Contig1     GGGAGTCCAGCTTGAGGAAAGAGACTGCAGCTGCCTGGACAGGGCCTAAATTCATCTGTTGGCTCAACTTGAAAAGGAATCATGGAAAGGAACATCATATATTTGTGGATTTGTGCTTTTGCAGTAGTTCATGGAAATCAAGAGACTTCACCACAACCTCCCATCAGTGATAAACTCCCATCATTGATAAAGATGAACAATGATTTTGCTTTTCACCTGTACAAGAGGCTTGTAGAAATGCCAGAGTATCAGTCCAAGAACATCTTCTTCTCTCCCTTCAGTGTGTCCATGGCCCTTTCTGAGCTGTCTTTAGGAGCCGGTGGTGAAACCAAAGAGCAGCTTCTCAGTGGCATCGGCCATAACAGCTCGGTCTTCAGCACTGAAGAAATGCACCAGATGTTCCACAGTCTCCTGGAAGAAATCGACCAGAGGACAGGGGTGGACATTAATGTCGGCAGTGCTCTATATGCAAGTGACAAATTAAAGCTCCTTCCTGAGTTCTTAAAGGAGATAAAGGAGTTTTACCACTCTGACGGCTTCACTGTGGATTTCAGCGTCAAAGAAACACTGGATAAAATCAACACGTATGTGAAGGAAAAAACACATGGGAAAATAGACCAAGCTGTTGATGATCTGGAATCTGACACTCTGATGTTTCTTCTCACTTACATATATTTTAAAGGAAAATGGGACATGCCATTTAACCCAAGCAAGACCAGTCAAAG
                                             -----------------------------------------------------------------------------------------------------------------------------------------------------------------------------------------------------------------------------------------------------------------------------------------------------------------------------------------------------------------------------------------------------------------------------------------------------------------------------------------------------------------------------------------------------------------------------------------------------------------------------------------------------------------------------------------------------------------------------------------------------
      gi|50733174|gb|CA967341.2|CA967341     GGGAGTCCAGCTTGAGGAAAGAGACTGCAGCTGCCTGGACAGGGCCTAAATTCATCTGTTGGCTCAACTTGAAAAGGAATCATGGAAAGGAACATCATATATTTGTGGATTTGTGCTTTTGCAGTAGTTCATGGAAATCAAGAGACTTCACCACAACCTCCCACCAGTGATAAACTCCCATCATTGATAAAGATGAACAATGATTTTGCTTTTCACCTGTACAAGAGGCTTGTAGAAATGCCAGAGTATCAGTCCAAGAACATCTTCTTCTCTCCCTTCAGTGTGTCCATGGCCCTTTCTGAGCTGTCTTTAGGAGCTGGTGGTGAAACCAAAGAGCAGCTTCTCAGTGGCATCGGCCATAACAGCTCGGTCTTCAGCACTGAAGAAATGCACCAGATGTTCCACAGTCTCCTGGAAGAAATCGACCAGAGGACAGGGGTGGACATTAATGTCGGCAGTGCTCTATATGCAAGTGACAAATTAAAGCTCCTTCCTGAGTTCTTGAAGGAGATAAAGGAGTTTTACCACTCTGACGGCTTCACTGTGGATTTCAGCGTCAAAGAAACACTGGATAAAATCAACACGTATGTGAAGGAAAAAACACATGGGAAAATAGACCAAGCTGTTGATGATCTGGAATCTGACACGCTGATGTTTCTTCTCACTTACATATATTTTAAAGGAAAATGGGACATGCCATTTAACCCAAGCAAGACCAGTCAAAG
      gi|50733222|gb|CA967389.2|CA967389              GCTTGAGGAAAGAGACTGCAGCTGCCTGGACAGGGCCTAAATTCATCTGTTGGCTCATCTTGAAAAGGAATCATGGAAAGGAACATCATATATTTGTGGATTTGTGCTTTTGCAGTAGTTCATGGAAATCAAGAGACTTCACCACAACCTCCCATCAGTGATAAACTCCCATCATTGGTAAAGATGAACAATGATTTTGCTTTTCACCTGTACAAGAGGCTTGTAGAAATGCCAGAGTATCAGTCCAAGAACATCTTCTTCTCTCCATTCAGTGTGTCCATGGCCCTTTCTGAGCTGTGTTTAGGAGCCGGTGGTGAAACCAAAGAGCAGCTTCTCAGTGGCATCGGCCATAACAGCTCGGTCTTCAGCACTGAAGAAATGCACCAGATGTTCCACAGTTTCCTGGAAGAAATCGACCAGAGGACAGGGGTGGACATTGATGTCGGCAGTGCTLL                                                                                                                                                                                                                                                                     
      gi|50733834|gb|CA967789.2|CA967789                 LLLLLLLLLLLLLLLCAGCTGC*TGGACAGG*CCTAAAT*CATCT*TTGGCTCAACTTGAAAAGGAATCATGCAAAGGAACATCATAT*TGTGTGGATTTGTGCTTTTGCAGTAGTTCATGGGAATCAAGAGACTTTACCACAACCTCCCATCAGCGATAAACTCCCGTCATTGATAAAGATGAACAATGATTTTGCTTTTCACCTGTACAAGAGGCTTGTAGAAATGCCCGACTATCAGTCCAAGAATATCTTCTTCTCTCCCCTCAGTGTGTCCATGGCCCTTTCTGAGCTGTGTTTAGGAGCCGGTGGTGAAACTAAAGAGCAGCTTCTCAGTGGCATCGGCCAGAACAGCTCGATCTTCAGCACTGAAGAAATGCACCAGATGTTCCACAGTCTCCTAGAGGAAATCGACAAGAGGACAGGGGTGGACATCAATGTCGGCAGTGCTCTATATGTAAGTGACCAATLLLLLLLLL                                                                                                                                                                                                                                           
      gi|50738771|gb|CA965402.2|CA965402                                            CAGGGCCTAAATTCATCTGTTGGCTCAACTTGAAAAGGAATCATGGAAAGGAACATCATATATTTGTGGATTTGTGCTTTTGCAGTAGTTCATGGAAATCAAGAGACTTCACCACAACCGGCCATCAGTGATAAACTCCCATCATTGATAAAGATGAACAATGATTTTGCTTTTCACCTGTACAAGAGGCTTGTAGAAATGCCAGAGTATCAGTCCAAGAACATCTTCTTCTCTCCCTTCAGTGTGTCCATGGCCCTTTCTGAGCTGTCTTTAGGAGCCGGTGGTGAAACCAAAGAGCAGCTTCTCAGTGGCATCGGCCATAACAGCTCGGTCTTCAGCACTGAAGAAATGCACCAGATGTTCCACAGTCTCCTGGAAGAAATCGACCAGAGGACAGGGGTGGACATTAATGTCGGCAGTGCTCTATATGCAAGTGACAAATTAAAGCTCCTTCCTGAGTTCTTAAAGGAGATAAAGGAGTTTTACCACTCTGACGGCTTCACTGTGGATTTCAGCGTCAAAGAAACACTGGATAAAATCAACACGTATGTGAAGGAAAAAACACATGGGAAAATAGACCAAGCTGTTGATGATCTGGAATCTGACACTCTGATGTTTCTTCTCACTTACATATATTTTAA                                             

Putative SNPs: 308C>G

19.
                                                                                                                                                100                                                                                                 200                                                                                                 300                                                                                                 400                                                                                                 500                                                                                                 600                                                                                                 700                                                                                                 800                                                                                                 900                                                                                                 1000                                                                                                1100                                                                                                1200
                                             .........+.........+.........+.........+.........+.........+.........+.........+.........+.........|.........+.........+.........+.........+.........+.........+.........+.........+.........+.........|.........+.........+.........+.........+.........+.........+.........+.........+.........+.........|.........+.........+.........+.........+.........+.........+.........+.........+.........+.........|.........+.........+.........+.........+.........+.........+.........+.........+.........+.........|.........+.........+.........+.........+.........+.........+.........+.........+.........+.........|.........+.........+.........+.........+.........+.........+.........+.........+.........+.........|.........+.........+.........+.........+.........+.........+.........+.........+.........+.........|.........+.........+.........+.........+.........+.........+.........+.........+.........+.........|.........+.........+.........+.........+.........+.........+.........+.........+.........+.........|.........+.........+.........+.........+.........+.........+.........+.........+.........+.........|.........+.........+.........+.........+.........+.........+.........+.........+.........+.........|.........+.........+.........+.........+.........+.........+....
        Cyprinus_Cluster7955.seq.Contig1     CCCGCGGGGGAAATCAGGGAGCGAGAAGAG**CCGTCGGAGTGAATTCGTGTCGACTGTCCAGAGTCCGCGAATTCAAGTCCGTCCACCTGGTGAACATCCGAGAGCGAACATCCTTAACGAGCATTTCCACCAGAAGCGGAGGATCAGTTCAGGCAGAGGTGCAGCTTATTTGAAGACAATGTCCCTGCACCAGTTTTTGTTGGAACCAATCACATGCCATGCATGGAACCGGGACAGGACCCAAATTGCTATCAGTCCAAACAATCATGAAGTCCATATATACAAGAAAAGTGGGAATCAGTGGGTGAAAGTTCACGAATTAAAAGAACACAACGGGCACATCACCGGCATTGATTGGGCTCCTAAAAGTGATCGTATTGTGACCTGTGGAGCTGACCGTAATGCTTATGTATGGAGTCAAAAGGACGGCGTGTGGAAACCCACCCTTGTTATTCTCAGGATCAACCGTGCTGCCACGTTTGTGAAATGGTCTCCGCTGGAGAACAAGTTTGCAGTGGGGAGTGGAGCGCGACTCATATCCGTTTGCTACTTTGAGTCTGAAAATGATTGGTGGGTTAGTAAACACATCAAGAAGCCCATCCGTTCAACTGTCCTCAGTTTAGACTGGCATCCAAATAATGTGCTTCTGGCAGCTGGGTCATGTGACTTCAAATGCAGGGTATTCTCTGCGTACATCAAGGAGGTGGATGAGAAACCAGCCCCAACCCCGTGGGGGTCCAAGATGCCCTTTGGGCAGGTGATGTCAGAGTTTGGCGGGGCAGGAAGTGGAGGATGGGTTCACAGCGTCTGTTTCTCAGCCAGTGGGAACAGACTGGCTTGGGTCAGCCATGACAGCACTGTCACTGTAGTGGACCCCACAGTAAGCTCAACGCCAAGCCAGTTAAAGACCGAATTCCTTGCTCTCCTAAGTGTGACTTTTGTTTCTGAGAACAACATTGTGGCAGCAGGTCACGATTGCTGCCCTATGCTGTTCAGTTTTGATGATGGTGGAAACTTGACCTTCATATCCAAGCTGGACATTCCCAAGCAGAGCATCCAGCGCAACATTTCTGCCATGGAGCGCTTCCGCAACATGGACAAGAGGGCCACCACTGAGGACCGCAATAGCACCCTAGAAACCCTGCATCAGAACAGCATCACCCAAGTGTCTATATACGAAGGAGACAAAAGAGATTGTCGCAAATTCTGCACTACAGGAATTGACGGAGCAATGACCATATGGGATTTCAAGACCTTAGAGT
                                             ----------------------------------------------------------------------------------------------------------------------------------------------------------------------------------------------------------------------------------------------------------------------------------------------------------------------------------------------------------------------------------------------------------------------------------------------------------------------------------------------------------------------------------------------------------------------------------------------------------------------------------------------------------------------------------------------------------------------------------------------------------------------------------------------------------------------------------------------------------------------------------------------------------------------------------------------------------------------------------------------------------------------------------------------------------------------------------------------------------------------------------------------------------------------------------------------------------------------------------------------------------------------------------------------------------------
     gi|109283764|gb|EC394474.1|EC394474     CCCGCGGGGGAAATCAGGGAGCGAGAAGAG**CCGTCGGAGTGAATTCGTGTCGACTGTCCAGAGTCCGCGAATTCAAGTCCGTCCACCTGGTGAACATCCGAGAGCGAACATCCTTAACGAGCATTTCCACCAGAAGCGGAGGATCAGTTCAGGCAGAGGTGCAGCTTATTTGAAGACAATGTCCCTGCACCAGTTTTTGTTGGAACCAATCACATGCCATGCATGGAACCGGGACAGGACCCAAACTGCTATCAGTCCAAACAATCATGAAGTCCATATATACAAGAAAAGTGGGAATCAGTGGGTGAAAGTTCACGAATTAAAAGAACACAACGGGCACATCACCGGCATTGATTGGGCTCCTAAAAGTGATCGTATTGTGACCTGTGGAGCTGACCGTAATGCTTATGTATGGAGTCAAAAGGACGGCGTGTGGAAACCCACCCTTGTTATTCTCAGGATCAACCGTGCTGCCACGTTTGTGAAATGGTCTCCGCTGGAGAACAAGTTTGCAGTGGGGAGTGGAGCGCGACTCATATCCGTTTGCTACTTTGAGTCTGAAAATGATTGGTGGGTTAGTAAACACATCAAGAAGCCCATCCGTTCAACTGTCCTCAGTTTAGACTGGCATCCAAATAATGTGCTTCTGGCAGCTGGGTCATGTGA                                                                                                                                                                                                                                                                                                                                                                                                                                                                                                                                                                                                                    
     gi|109282383|gb|EC393767.1|EC393767        LLLLLLLLLATCAGGGAGCGAGAAGAGAGCAGCCGGAGTGAATTCGTGTCGACTGTCCAGAGTCCGCGAATTCAAGTCCGTCCACCAAGTGAACACCCGAGAGACAACATCCTCG*CGAGCATTTCCTCAAGAAGCGGAGCATCGGTTCAGGCAGAGGTGCACGTTATTTGAAGACGATGTCGCTGCACCAGTTTTTGTTGGAACCCATCACGTGCCATGCGTGGAACCGGGACAGGACCCAAATTGCTATCAGTCCAAACAACCGTGAAGTCCACATATACAAGAAAAGTGGAAATCGGTGGGTGAAGGCTCACGAATTAAAAGAACACAATGGGCACATCACAGGCATTGATTGGGCTCCTAAAAGTGATCGTATTGTGACCTGTGGAGCTGACCGTAATGCTTATGTATGGAGTCAAAAGGACGGCATGTGGAAACCCACCCTTGTTATTCTCAGGATCAACCGTGCTGCCACGTTTGTGAAATGGTCCCCGCTTGAGAACAAGTTTGCTGTTGGTAGTGGAGCGCGACTCATATCCGTTTGCTACTTTGAGTCTGAAAATGATTGGTGGGTTAGTAAACACATCAAGAAGCCCATCCGTTCAACTGTCCTCAGTTTAGACTGGCATCCAAATAATGTGCTTCTGGCAGCTGGGTCATGTGACTTCAAATGTAGGG                                                                                                                                                                                                                                                                                                                                                                                                                                                                                                                                                                                                      
     gi|109279931|gb|EC392501.1|EC392501          GGGGGAAATCAGGGAGCGAGAAGAG**CCGTCGGAGTGAATTCGTGTCGACTGTCCAGAGTCCGCGAATTCAAGTCCGTCCACCTGGTGAACATCCGAGAGCGAACATCCTTAACGAGCATTTCCACCAGAAGCGGAGGATCAGTTCAGGCAGAGGTGCAGCTTATTTGAAGACAATGTCCCTGCACCAGTTTTTGTTGGAACCAATCACATGCCATGCATGGAACCGGGACAGGACCCAAATTGCTATCAGTCCAAACAATCATGAAGTCCATATATACAAGAAAAGTGGGAATCAGTGGGTGAAAGTTCACGAATTAAAAGAACACAACGGGCACATCACCGGCATTGATTGGGCTCCTAAAAGTGATCGTATTGTGACCTGTGGAGCTGACCGTAATGCTTATGTATGGAGTCAAAAGGACGGCGTGTGGAAACCCACCCTTGTTATTCTCAGGATCAACCGTGCTGCCACGTTTGTGAAATGGTCTCCGCTGGAGAACAAGTTTGCAGTGGGGAGTGGAGCGCGACTCATATCCGTTTGCTACTTTGAGTCTGAAAATGATTGGTGGGTTAGTAAACACATCAAGAAGCCCATCCGTTCAACTGTCCTCAGTTTAGACTGGCATCCAAATAATGTGCTTCTGGCAGCTGGGTCATGTGACTTCAAATGCAGGGTATTCTCTGCGTACA                                                                                                                                                                                                                                                                                                                                                                                                                                                                                                                                                                                       
      gi|50743212|gb|CF661020.2|CF661020                                                                                                                                                                                                                                                                                                                                                                                                                                 TATGGAGTCAAAAGGACGGCATGTGGAAACCCACCCTTGTTATTCTCAGGATCA*CCGTGCTGCCACGTTTGTGAAATGGTCCCCGCTGGAGAACAAGTTTGCAGTTGGGAGTGGAGCGCGACTCATATCCGTTTGCTACTTTGAGTCTGAAAATGATTGGTGGGTTAGTAAACACATCAAGAAGCCCATCCGTTCAACTGTCCTCAGTTTAGACTGGCATCCAAATAATGTGCTTCTGGCAGCTGGGTCATGTGACTTCAAATGCAGGGTATTCTCTGCGTACATCAAGGAGGTGGATGAGAAACCAGCCCCAACCCCGTGGGGGTCCAAGATGCCCTTTGGGCAGGTGATGTCAGAGTTTGGCGGGGCAGGAAGTGGAGGATGGGTTCACAGCGTCTGTTTCTCAGCCAGTGGGAACAGACTGGCTTGGGTCAGCCATGACAGCACTGTCACTGTAGTGGACCCCACAGTAAGCTCAACGCCAAGCCAGTTAAAGACCGAATTCCTTGCTCTCCTAAGTGTGACTTTTGTTTCTGAGAACAACATTGTGGCAGCAGGTCACGATTGCTGCCCTATGCTGTTCAGTTTTGATGATGGTGGAAACTTGACCTTCATATCCAAGCTGGACATTCCCAAGCAGAGCATCCAGCGCAACATTTCTGCCATGGAGCGCTTCCGCAACATGGACAAGAGGGCCACCACTGAGGACCGCAATAGCACCCTAGAAACCCTGCATCAGAACAGCATCACCCAAGTGTCTATATACGAAGGAGACAAAAGAGATTGTCGCAAATTCTGCACTACAGGAATTGACGGAGCAATGACCATATGGGATTTCAAGACCTTAGAGT

Putative SNPs: 433G>A, 495T>C, 519G>T

20.
                                                                                                                                                100                                                                                                 200                                                                                                 300                                                                                                 400                                                                                                 500                                                                                                 600                                                                                                 700                                                                                                 800                                                                                                 900                                                                                                 1000
                                             .........+.........+.........+.........+.........+.........+.........+.........+.........+.........|.........+.........+.........+.........+.........+.........+.........+.........+.........+.........|.........+.........+.........+.........+.........+.........+.........+.........+.........+.........|.........+.........+.........+.........+.........+.........+.........+.........+.........+.........|.........+.........+.........+.........+.........+.........+.........+.........+.........+.........|.........+.........+.........+.........+.........+.........+.........+.........+.........+.........|.........+.........+.........+.........+.........+.........+.........+.........+.........+.........|.........+.........+.........+.........+.........+.........+.........+.........+.........+.........|.........+.........+.........+.........+.........+.........+.........+.........+.........+.........|.........+.........+.........+.........+.........+.........+.........+.........+.........+.........|.........+.........+.........+...
        Cyprinus_Cluster7957.seq.Contig1     CGGGGGATTGAAACGGGAGGCTGTCGACAGTAGGG**CATCTTTTGCATCACTCTCTCCTAAA*CAGGTAGCTTTGAGCCGCAGACATGACGCACCAGTACCCCGCACTCACATCTGAGCAGAAGAAGGAGCTTCAGGACATCGCTCAGCGTATCGTAGCTCCTGGAAAGGGCATCCTCGCTGCAGATGAGTCCACAGGTAGCATGGCAAAGCGACTGAACCCCATCGGTGTTGAGAACACTGAGGAAAACCGCCGTCTGTACCGCCAGATCCTTTT*CTCTGCTGACGAGCGCATTGACAAGTGCATTGGTGGTGTCATCTTCTTCCACGAGACCCTTTACCAGAAAGCTGATGATGGCACACCCTTTGCCAAAATGATCAAGGACAGGGGCATTGTTGTGGGAATCAAGGTTGACAAAGGTGTCGTCCCTCTGGCAGGAACAAATGGAGAGACCACAACACAGGGGCTTGATGGCCTGTCAGAACGCTGTGCTCAGTATAAGAAAGATGGTGCAGACTTTGCCAAGTGGCGGTCTGTACTGAAGATCAGCGAGACCACTCCTTCAGAGTTAGCCATCATGGAGAATGCTAACGTCCTGGCTCGCTACGCCAGCATCTGCCAGCAGAATGGGATTGTGCCCATTGTTGAGCCAGAGATTCTACCTGATGGGGACCACGACTTGAAGCGCTGCCAGTATGTTTCAGAGAAGGTCCTTGCTGCCTGCTACAAGGCCCTGTCTGACCATCGCGTCTATCTGGAGGGAACTCTTCTGAAGCCCAACATGGTGACAGCTGGACACTCCTGCCCCACCAAATTCTCCAATCAGGAAATCGCCATGGCTACAGTGACAGCCTTGCGCCGTACCGTTCCCCCCGCAGTAACAGGTGTGACATTCCTCTCTGGAGGTCAGAGTGAGGAGGAGGCATCTATCAACTTGAACGCCATCAACACCTGCCCTCTGACAAAACCCTGGGCCCTCACCTTCTCCTATGGACGTGCCCTGCAGGCCTCAGCCCTCACCGCCTGGCGCG
                                             -------------------------------------------------------------------------------------------------------------------------------------------------------------------------------------------------------------------------------------------------------------------------------------------------------------------------------------------------------------------------------------------------------------------------------------------------------------------------------------------------------------------------------------------------------------------------------------------------------------------------------------------------------------------------------------------------------------------------------------------------------------------------------------------------------------------------------------------------------------------------------------------------------------------------------------------------------------------------------------------------------------------------------------------------------------------------
      gi|50741221|gb|CF662330.2|CF662330     CGGGGGATTGAA*CGGGAGGCTGTCGACAGTAGGGGGCATCTTTTGCATCACTCTCTCCTAAA*CAGGTAGCTTTGAGCCGCAGACATGACGCACCAGTACCCCGCACTCACATCTGAGCAGAAGAAGGAGCTTCAGGACATCGCTCAGCGTATCGTAGCTCCTGGAAAGGGCATCCTCGCTGCAGATGAGTCCACAGGTAGCATGGCAAAGCGACTGAACCCCATCGGTGTTGAGAACACTGAGGAAAACCGCCGTCTGTACCGCCAGATCCTTTT*CTCTGCTGACGAGCGCATTGACAAGTGCATTGGTGGTGTCATCTTCTTCCACGAGACCCTTTACCAGAAAGCTGATGATGGCACACCCTTTGCCAAAATGATCAAGGACAGGGGCATTGTTGTGGGAATCAAGGTTGACAAAGGTGTCGTCCCTCTGGCAGGAACAAATGGAGAGACCACAACACAGGGGCTTGATGGCCTGTCAGAACGCTGTGCTCAGTATAAGAAAGATGGTGCAGACTTTGCCAAGTGGCGGTCTGTACTGAAGATCAGCGAGACCACTCCTTCAGAGCTAGCCATCATGGAGAATGCTAACGTCCTGGCTCGCTACGCCAGCATCTGCCAGCAGAATGGGATTGTGCCCATTGTTGAGCCAGAGATTCTACCTGATGGGGACCACGACTTGAAGCGCTGCCAGTATGTTTCAGAGAAGGTCCTTGCTGCCTGCTACAAGGCCCTGTCTGATCATCL                                                                                                                                                                                                                                                                                            
      gi|50740620|gb|CA966867.2|CA966867       GGGTATTGAATCGGGAGACTGTCGACAGTAGGG**CATCTTTTGCATCACTCTCTTCTAAATCAGGTTGCTTTGAGCCGCAGACATGACGCACCAATACCCCGCACTCACAACTGAGCAGAAGAAGGAGCTCCAGGACATCGCTCAGCGTATCGTAGCTCCTGGGAAGGGCATCCTTGCTGCAGATGAGTCCACAGGTAGTATGGCAAAGCGCCTGAACCCCATTGGCGTCGAGAACACCGAGGAAAACCGCCGTCTGTACCGCCAGATCCTTTTTCTCTGCTGACGAGCGCATAGACAAGTGCATTGGTGGTGTCATCTTCTTCCACGAGACCCTTTACCAGAAAGCTGATGATGGCACACCCTTTGCCAAAATGATCAAGGACAGGGGCATTGTTGTGGGAATCAAGGTGGACAAAGGTGTCGTCCCTCTGGCAGGAACAAATGGAGAGACCACAACACAGGGGCTTGATGGCCTGTCAAAACGCTGTGCTCANTATAAGAAAGACGGTGCAGACTTTGCCAAGTGGAGGTCTGTGCTGAAGATCAGCGAGACCACTCCTTCAGAGTTAGCCATCATGGAGAACGCTAACGTCCTGGCTCGCT                                                                                                                                                                                                                                                                                                                                                                                                                                          
     gi|109280975|gb|EC393037.1|EC393037       GGGGATTGAAACGGGAGGCTGTCGACAGTAGGG**CATCTTTTGCATCACTCTCTCCTAAA*CAGGTAGCTTTGAGCCGCAGACATGACGCACCAGTACCCCGCACTCACATCTGAGCAGAAGAAGGAGCTTCAGGACATCGCTCAGCGTATCGTAGCTCCTGGAAAGGGCATCCTCGCTGCAGATGAGTCCACAGGTAGCATGGCAAAGCGACTGAACCCCATCGGTGTTGAGAACACTGAGGAAAACCGCCGTCTGTACCGCCAGATCCTTTT*CTCTGCTGACGAGCGCATTGACAAGTGCATTGGTGGTGTCATCTTCTTCCACGAGACCCTTTACCAGAAAGCTGATGATGGCACACCCTTTGCCAAAATGATCAAGGACAGGGGCATTGTTGTGGGAACCAAGGTTGACAAAGGTGTCGTCCCTCTGGCAGGAACAAATGGAGAGACCACAACACAGGGGCTTGATGGCCTGTCAGAACGCTGTGCTCAGTATAAGAAAGATGGTGCAGACTTTGCCAAGTGGCGGTCTGTACTGAAGATCAGCGAGACCACTCCTTCAGAGTTAGCCATCATGGAGAATGCTAACGTCCTGGCTCGCTACGCCAGCATCTGCCAGCAGAATGGGATTGTGCCCATTGTTGAGCCAGAGATTCTACCTGATGGGGACCACGACTTTGAGCGCTGCCAGTATGTTT                                                                                                                                                                                                                                                                                                                                          
     gi|109280275|gb|EC392678.1|EC392678                                                                                                                                                                                                                                                                                                                                                                                                                    LLGGGAATCAAGGTGGACAAAGGTGTCGTCCCTCTGGCAGGAACAAATGGAGAGACCACAACACAGGGGCTTGACGGCCTGTCAGAACGCTGTGCTCAGTATAAGAAAGACGGTGCAGACTTTGCCAAGTGGAGGTCTGTGCTGAAGATCAGCGAGACCACTCCTTCAGAGTTAGCCATCATGGAGAACGCTAACGTCCTGGCTCGCTACGCCAGCATCTGCCAGCAGAATGGGATTGTGCCCATTGTTGAGCCAGAGATTCTACCTGATGGTGACCACGACTTGAAACGCTGCCAGTATGTTACAGAGAAGGTCCTTGCTGCCTGCTACAAGGCCCTGTCTGACCATCGCGTCTATCTGGAGGGAACTCTTCTGAAGCCCAACATGGTGACAGCTGGACACTCCTGCCCCACCAAATTCTCCAATCAGGAAATCGCCATGGCTACAGTGACAGCCTTGCGCCGTACCGTTCCCCCCGCAGTAACAGGTGTGACATTCCTCTCTGGAGGTCAGAGTGAGGAGGAGGCATCTATCAACTTGAACGCCATCAACACCTGCCCTCTGACAAAACCCTGGGCCCTCACCTTCTCCTATGGACGTGCCCTGCAGGCCTCAGCCCTCACCGCCTGGCGCG

Putative SNPs: 414T>G, 510T>C, 532C>A, 540A>G, 588T>C

21.
                                                                                                                                                100                                                                                                 200                                                                                                 300                                                                                                 400                                                                                                 500                                                                                                 600                                                                                                 700                                                                                                 800                                                                                                 900                                                                                                 1000                                                                                                1100
                                             .........+.........+.........+.........+.........+.........+.........+.........+.........+.........|.........+.........+.........+.........+.........+.........+.........+.........+.........+.........|.........+.........+.........+.........+.........+.........+.........+.........+.........+.........|.........+.........+.........+.........+.........+.........+.........+.........+.........+.........|.........+.........+.........+.........+.........+.........+.........+.........+.........+.........|.........+.........+.........+.........+.........+.........+.........+.........+.........+.........|.........+.........+.........+.........+.........+.........+.........+.........+.........+.........|.........+.........+.........+.........+.........+.........+.........+.........+.........+.........|.........+.........+.........+.........+.........+.........+.........+.........+.........+.........|.........+.........+.........+.........+.........+.........+.........+.........+.........+.........|.........+.........+.........+.........+.........+.........+.........+.........+.........+.........|.........+.........+.........+.....
        Cyprinus_Cluster7961.seq.Contig1     GGGGAGGTGTACACACATTCCAGCATATGTATGGCTGTGAATGGGACGATAAGACTGAAGAAACCAGTGGATATCACCAGTATGGATATGATGGAGAGGATTTCATAACTATGGATTTGAAAGAGCTGAGATACATCTCTCCAGTGCAGCAAGGACACATCACTACGCAGAAGTGGAACGAAAACAAAGCCCAGATTGAGAATAACAAACTTTACTACAGCACTATATGCATTGAGTGGCTGCAGAAGTATCTACAG*TATGGAAAGAGCAGCCTGGAGAAAAAAGTCTCTCCTCAGGTGTCTCTGCTGCAGAAGTCTTCCTCGTCTCCAGTCACGTGTCATGCTACAGGTTTTTACCCCAGTGGAGTAACAATCACCTGGATGAAAAATGGACAAGATCATGATGAGGATGTGGATCTTGGTGAACTTCTTCTCAATGAGGACGGGACTTTCCAGAAGA*CGAGCACCCTCAATGTTAAACCTGATGAGTGGAAGAAGAACAAGTTCAGCTGTGTGGTGGAACATCAGGGCAAAACCATCAGAGAGATCCTGACAGAGGACAAGATCAAAACTAACTACGCTCCTTTCCCCATCGGCATCATCATTGGTATTGTTGTTGCTGTCCTCCTGTTGATTGTGATTGGTGTTGCTGGGTATAAGGTCTATCAGAAAAAGAAAGGCTTCAAACCTGTTAATGGCTCTGATGATGGATCGAACAGCTCAGCTCATACAGATCCAAAAGCATAAAGATGAGACCAGATGAGTGCGAGAGATGAAGTAAAACATGATGCTTATCCTGCTGTCCATCTTGCTTACAACACACACACACGCACACACAATCATAGTTTTCAGTGATGGGATTTATCTATATTATGGTTCTACATTAATTACATCTGCAAAGTAAAGTTTTTATTTCTTCACACTTTATGTTCCTCTTTTGTTTTTCTTTAATTGTATGAACTTTCATTCATTTTAAGATGG*CATGTTGATCTCAGAGCTTAATTGTAAAATATATATATATTTCTCTTTGGTGACCAAAAGAAACCAAGAATACAAATAATTGATTTGCGAGTTTGATTAATTTGTAGGATTTGTGATATCTGTACTGATTATGAAACAAGAGAAACTTGTGA
                                             -------------------------------------------------------------------------------------------------------------------------------------------------------------------------------------------------------------------------------------------------------------------------------------------------------------------------------------------------------------------------------------------------------------------------------------------------------------------------------------------------------------------------------------------------------------------------------------------------------------------------------------------------------------------------------------------------------------------------------------------------------------------------------------------------------------------------------------------------------------------------------------------------------------------------------------------------------------------------------------------------------------------------------------------------------------------------------------------------------------------------------------------------------------------------------
     gi|109279228|gb|EC392139.1|EC392139     GGGGAGGTGTACACACATTCCAGCATATGTATGGCTGTGAATGGGACGATAAGACTGAAGAAACCAGTGGATATCACCAGTATGGATATGATGGAGAGGATTTCATAACTATGGATTTGAAAGAGCTGAGATACATCTCTCCAGTGCAGCAAGGACACATCACTACGCAGAAGTGGAACGAAAACAAAGCCCAGATTGAGAATAACAAACTTTACTACAGCACTATATGCATTGAGTGGCTGAAGAAATATATACAG*TATGGAAAAAGCAGCCTGGAGAAAACAGTCTCTCCTCAGGTGTCTCTGCTGCAGAAGTCTTCCTCGTCTCCAGTCACGTGTCATGCTACAGGATTTTACCCCAGTGGAGTAACAATCACCTGGATGAAAAATGGACAAGATCATGATGAAGATGTGGATCTTGGTGAACTTCTTCCCAATGAGGACGGGACTTTCCAGAAGA*CGAGCACCCTCAATGTAAAACCTGATGAGCTGAAGAAGAACCAGTTCAGCTGTGTGGTGGAACATCAGGGCAAAACCATCAGAGAAATACTGACAGALLLLLLLLLLLLLLLLLLLLLLLLLLLLLLLLLLLLLLLLLLLLLLLLLLLLLLLLLLLLLLLLLLLLLLLLLLLLLLLLLLLLLLLLLLLLL                                                                                                                                                                                                                                                                                                                                                                                                                                                                                                    
     gi|109279580|gb|EC392319.1|EC392319                                                                      LLLLLLLLLLLLLLLLLLLLLLLLLLLLLLLLLLLLLLLLLLLLLLLLLLLLLLLLLLLLLLLLLLLLLLLLLLLLLLLLLLLLLLLLLLLLLLLLLLLLLLLLLLLLLLLLLLLLLLLLLLLLLLLLLLLLLLLLLLLLLLLLLLLLLLLLLLLLLLLLLLTGCATTGAGTGGCTGCAGAAGTATCTACAG*TATGGAAAGAGCAGCCTGGAGAAAAAAGTCTCTCCTCAGGTGTCTCTGCTGCAGAAGTCTTCCTCGTCTCCAGTCGTGTGTCATGCTACAGGTTTTTACCCCAGTGGAGTAACAATCACCTGGATGAGAAATGACCAAGAGCATCATGAGGATGTGGAGGTTGGTGAACTTCTTCTCAATGAGGATGGAACCTTTCAGAAGA*CGAGCACCCTCAATGTTAAACCTGATGAGTGGAAGAAGAATGAGTACAAATGTGTGGTGGAACATCAGGGCAAAACC****GAGACAGC**GAATGAGATCAGGA*CAAA*CAATGTAGAGTCTGTTCCC*ATTGGCATAATTGTTGGTGCTGTTGCTGCTGTGGTTCTGTTGGTTGTCATTGCTGTTGCTGCGTATATGGTGTATCAGAAGAAAAAAGGCTTTAAACCTGTCAGCGCCTCTGATGATGGTTCTAACAGCTCAGCTCATACAGATCCGCATGCATGAAGAT                                                                                                                                                                                                                                                                                                                                                                                               
     gi|109282134|gb|EC393645.1|EC393645                                                                                                                                                                                                                                               LLLGGCTACAGAAGTATGTG*AGATATGGCAAGGACACTCTGGAGAGAAAAGTCTCTCCTCAGGTGTCTCTGTTGCAGAAGGATCCTTTATCTCCAGTCACATGTCACACTACAGGTTTTTACCCCAGTGGAGTAACTATCACCTGGCAGAAAAATGGACAAGATCATGATGAGGATGTGGATCTTGGAGAACTTATTATCAATGAGGACGGGACCTTCCAGA*GAGCAAGCACCCTCAATGTTAAACCTGAAGAGTGGAAGAACAACAAGTTCAGCTGTGTGGTGGAGCACCAGGGCAAAACCATCAGAGAGATCCTGACAGAGGACAAGATCAAAACTAACTACGCTCCTTTCCCCATCGGCATCATCATTGGTATTGTTGTTGCTGTCCTCCTGTTGATTGTGATTGGTGTTGCTGGGTATAAGGTCTATCAGAAAAAGAAAGGCTTCAAACCTGTTAATGGCTCTGATGATGGATCGAACAGCTCAGCTCATACAGATCCAAAAGCATAAAGATGAGACCAGATGAGTGCGAGAGATGAAGTAAAACATGATGCTTATCCTGCTGTCCATCTTGCTTACAACACACACACACGCACACACAATCATAGTTTTCAGTGATGGGATTTATCTATATTATGGTTCTACATTAATTACATCTGCAAAGTAAAGTTTTTATTTCTTCACACTTTATGTTCCTCTTTTGTTTTCCTTTAAT*GTATGAACTTTCATTCATTTTAAGATGGGCATGTLLLL                                                                                                                                               
     gi|109281677|gb|EC393394.1|EC393394                                                                                                                                                                                                                                                                                                                                                                                                                                                                                                                                         LLLGGAGCACCAGGGCAAAACCATCAGAGAGATCCTGACAGAGGACAAGATCAAAACTAACTACGCTCCTTTCCCCATCGGCATCATCATTGGTATTGTTGTTGCTGTCCTCCTGTTGATTGTGATTGGTGTTGCTGGGTATAAGGTCTATCAGAAAAAGAAAGGCTTCAAACCTGTTAATGGCTCTGATGATGGATCGAACAGCTCAGCTCATACAGATCCAAAAGCATAAAGATGAGACCAGATGAGTGCGAGAGATGAAGTAAAACATGATGCTTATCCTGCTGTCCATCTTGCTTACAACACACACACACGCACACACAATCATAGTTTTCAGTGATGGGATTTATCTATATTATGGTTCTACATTAATTACATCTGCAAAGTAAAGTTTTTATTTCTTCACACTTTATGTTCCTCTTTTGTTTTTCTTTAATTGTATGAACTTTCATTCATTTTAAGATGG*CATGTTGATCTCAGAGCTTAATTGTAAAATATATATATATTTCTCTTTGGTGACCAAAAGAAACCAAGAATACAAATAATTGATTTGCGAGTTTGATTAATTTGTAGGATTTGTGATATCTGTACTGATTATGAAACAAGAGAAACTTGTGA

Putative SNPs: 523A>G, 526T>C

22.                                                                                                                                               100                                                                                                 200                                                                                                 300                                                                                                 400                                                                                                 500                                                                                                 600                                                                                                 700                                                                                                 800                                                                                                 900                                                                                                 1000
                                             .........+.........+.........+.........+.........+.........+.........+.........+.........+.........|.........+.........+.........+.........+.........+.........+.........+.........+.........+.........|.........+.........+.........+.........+.........+.........+.........+.........+.........+.........|.........+.........+.........+.........+.........+.........+.........+.........+.........+.........|.........+.........+.........+.........+.........+.........+.........+.........+.........+.........|.........+.........+.........+.........+.........+.........+.........+.........+.........+.........|.........+.........+.........+.........+.........+.........+.........+.........+.........+.........|.........+.........+.........+.........+.........+.........+.........+.........+.........+.........|.........+.........+.........+.........+.........+.........+.........+.........+.........+.........|.........+.........+.........+.........+.........+.........+.........+.........+.........+.........|.........+.........+..
        Cyprinus_Cluster7969.seq.Contig1     GGGGAATCAGCTGAAGACTGAAGACACTGCAGTATATTACTGTGCAAGAGGGGTGGATTACTTCGACTACTGGGGGAAAGGAACCAAAGTCACCGTTTCCTCAGCTGAATCATCTCCACCAACGTCAATCTTCGCCATGTCCCAGTGTACTCCTGATTCTACTGGGTACGTCACCATCGGCTGCATGGCAAGAGGTTTCTCACCTGCGGACTCGCTGACTTTTAAATGGACGGATTATAATACGAAGGAGTTGAGTGATTTCGTGCAGTATCCAGCATTCGGCAGTGGTGGAGAATATGCCAAAGTCAGCCATATGCGCGTGAGAAAAAGCGAGTTGGATCCTCAAAAACCATACAACTGCGAAGCTTCAAATTCTAAAGGCAAAAAGAATAGTAAAGTTCCTCTTCTTCCACCACCCCCACCGCCAGATGTGCGTGCAACTGTGTACTTAACAGCACCTACAAAAATGGATTTAGAGAACGAAACAGCAACCTTCATGTGTTTAGCCCAACGGTTTTCGCCTAAATCACACACGTTTAAGTGGTTTCTGGATGGTAACGAGCTGAAAA*AAACGATAGAAAATTATGACAAAAGTGAGAAGAAAGGCTCAGTAACCGAATATAGTGCAACAAGCATTTTGCAAATCAGTGCCGAAGCCTGGAAGAAGCAAACCAGCAAAGTTAAGTGTGAGTTCGTGCACAAGGCGGGAAATGAAGAAAGAGAGGCCGAATATGCAGTTCCTATTCAAGATTGCAGCGATATTGCTGTTGATATAGTGCCTCCCTCCCTTGAAGCCATGCTGAAAAATAGAACAGGAGTGCTGAAGTGCAAAGCTTTATCAGAAAATCCAGGATTCGGCAAAATAACAATAACAGCTAATAATAACAACATCGCTGAGAAAGATATAAAGGGCAACGAAAAACATGTGGAACTTGATGCCCCGATTGGCTATGAAGAATGGGAGCAACGGCACTGAATTTACATGCACCGTTGAGCACAACGAGCTAGCAGAGCCCAAGTC
                                             --------------------------------------------------------------------------------------------------------------------------------------------------------------------------------------------------------------------------------------------------------------------------------------------------------------------------------------------------------------------------------------------------------------------------------------------------------------------------------------------------------------------------------------------------------------------------------------------------------------------------------------------------------------------------------------------------------------------------------------------------------------------------------------------------------------------------------------------------------------------------------------------------------------------------------------------------------------------------------------------------------------------------------------------------------------
     gi|109278691|gb|EC391864.1|EC391864     GGGGAATCAGCTGAAGACTGAAGACACTGCAGTATATTACTGTGCAAGAGGGGTGGATTACTTCGACTACTGGGGGAAAGGAACCAAAGTCACCGTTTCCTCAGCTGAATCATCTCCACCAACGTCAATCTTCGCCATGTCCCAGTGTACTCCTGATTCTACTGGGTACGTCACCATCGGCTGCATGGCAAGAGGTTTCTCACCTGCGGACTCGCTGACTTTTAAATGGACGGATTATAATACGAAGGAGTTGAGTGATTTCGTGCAGTATCCAGCATTCGGCAGTGGTGGAGAATATGCCAAAGTCAGCCATATGCGCGTGAGAAAAAGCGAGTTGGATCCTCAAAAACCATACAACTGCGAAGCTTCAAATTCTAAAGGCAAAAAGAATAGTAAAGTTCCTCTTCTTCCACCACCCCCACCGCCAGATGTGCGTGCAACTGTGTACTTAACAGCACCTACAAAAATGGATTTAGAGAACGAAACAGCAACCTTCATGTGTTTAGCCCAACGGTTTTCGCCTAAATCACACACGTTTAAGTGGTTTCTGGATGGTAACGAGCTGAAAA*AAACGATAGAAAATTATGACAAAAGTGAGAAGAAAGGCTCAGTAACCGAATATAGTGCAACAAGCATTTTGCAAATCAGTGCCGAAGCC                                                                                                                                                                                                                                                                                                                                                                           
     gi|109281994|gb|EC393564.1|EC393564                                                                                                                                                                                                                                                        LLLGGAGTTGAGTGATTTCGTGCAGTATCCAGCATTCGGCAGTGGTGGAGAATATACCAAAGTCAGCCATATGCGCGTGAGAAAAAGCGAGTTGGATCCTCAAAAACCATACAACTGCGAAGCTTCAAATTCTAAAGGCAAAAAGAATAGTAAAGTTCCTCTTCTTCCACCACCCCCACCGCCAGATGTGCGTGCAACTGTGTACTTAACAGCACCTACAAAAATGGATTTAGAGAACGAAACAGCAACCTTCATGTGTTTAGCCCAACGGTTTTCGCCTAAATCACACACGTTTAAGTGGTTTCTGGATGGTAACGAGCTGAAAA*AAACGATAGAAAATTATGACAAAAGTGAGAAGAAAGGCTCAGTAACCGAATATAGTGCAACAAGCATTTTGCAAATCAGTGCCGAAGCCTGGAAGAAGCAAACCAGCAAAGTTAAGTGTGAGTTCGTGCACAAGGCGGGAAATGAAGAAAGAGAGGCCGAATATGCAGTTCCTATTCAAGATTGCAGCGATATTGCTGTTGATATAGTGCCTCCCTCCCTTGAAGCCATGCTGAAAAATAGAACAGGAGTGCTGAAGTGCAAAGCTTTATCAGAAAATCCAGGATTCGGCAAAATAACAATAACAGCTAATAATAACAACATCGCTGAGAAAGATATAAAGGG                                                                                                             
     gi|109279182|gb|EC392115.1|EC392115                                                                                                                                                                                                                                                                                                LLLLLTGGAGACTATAGCAAAATCAGCCATCTGCGCGTGAGGAAAAGTGATTGGGATGCTAAAAAACCTTACAAATGCGAAGCTTCAAATTCTGAGGGCAGTAA****AG*AAACTAC*TCTTGTTCCATCACCCCCACCGCCAGATCAGCATGCAGATGTGTACTCAACAGTACCTACAAAAATGGAGTTAGACAATGGAACAGCAACCTTCATGTGTTTAGCCCAGCGGTTTTCACCTAAAACATGTGAGTTTAAGTGGTATCAGGATGGTAAGGAGGTGACAG*ATGCAATAGACAAATATGACAAAAGTGAGAAGAAAGGCTCAGTAACCGAATATAGTGCCACAAGCATTTTGCAAATCAGTGCCGACAAATGGAATCACCCAAACAACAAAATTAAGTGTGAGTTCGTGCACAAGACGGGAAAGAAAGTTATTGTGGCAGAATATGCAGTTCCTATTCAAGATTGCACCAATATTGCTGTTGATATAGTGCCTCCCTCCCTTGAAGACATGCTGAAAAATAGACAAGGAGTGCTGAAGTGCAAAGCTTCAGCAGACAATTCAGGTTTCACCAAAATAAAAATAGAAGCGAATAATAATATCATCGCTGAGLLLLLLLLLLLL                                                                                                               
      gi|22022009|gb|AU279277.1|AU279277                                                                                                                                                                                                                                                                                                                                                                                                                                                          CAACTGTGTACTTAACAGCACCTACAAAAATGGATTTAGAGAACGAAACAGCAACCTTCATGTGTTTAGCCCAACGGTTTTCGCCTAAATTATACACGTTTAAGTGGTCTCTGGATGATAAAGAGGTGAAAGTAAACGATAGAAAGTTATGACAAAAGTGAGAAGAAAGGCTCAGTAACCGAATATAGTGCCACAAGCATTTTGCAAATCAAGGCCGAAGCCTGGAAGAAGCAAACCAGCAAAGTTAAGTGTGAGTTCGTGCACAAGGCGGGAAATGAAGAAAGAGAGGCCGAATATGCAGTTCCTATTCAAGATTGCAGCGATATTGCTGTTGATATAGTGCCTCCCTCCCTTGAAGCCATGCTGAAAAATAGAACAGGAATGCTGAAGTGCAAAGCTTTATCAGAAAATCCAGGATTCGGCAAAATAACAATAACAGCTAATAATAACAACATCGCTGAGAAAGATATAAAGGGCAACGAAAAACATGTGGAACTTGATGCCCCGATTGGCTATGAAGAATGGGAGCAACGGCACTGAATTTACATGCACCGTTGAGCACAACGAGCTAGCAGAGCCCAAGTC

Putative SNPs: 530C>T, 563C>G, 569A>G, 629A>C

23.                                                                                                                                             100                                                                                                 200                                                                                                 300                                                                                                 400                                                                                                 500                                                                                                 600                                                                                                 700                                                                                                 800
                                             .........+.........+.........+.........+.........+.........+.........+.........+.........+.........|.........+.........+.........+.........+.........+.........+.........+.........+.........+.........|.........+.........+.........+.........+.........+.........+.........+.........+.........+.........|.........+.........+.........+.........+.........+.........+.........+.........+.........+.........|.........+.........+.........+.........+.........+.........+.........+.........+.........+.........|.........+.........+.........+.........+.........+.........+.........+.........+.........+.........|.........+.........+.........+.........+.........+.........+.........+.........+.........+.........|.........+.........+.........+.........+.........+.........+.........+.........+.........+.........|.........+.........+.........+.........+.........
        Cyprinus_Cluster7974.seq.Contig1     GGGGAGTTACTGGTCAAGATGAGAGGCTTACTGTTCCTGCTCAACGCTCTGCTCCTGCTGGAGTCAACAAAGGGATTGATGAAATATGATGAGTTAAATGATCATGACAGAGAAATTGTTGACAGGGCAATAGAACAAGCCAATAAGGATTTTGGAAAAA*CCAAACACCTTGACTTTTACACCATTGTCAATAGAAATAAAGATATGGTCAATGTGATCCTGAGATCCACCTCATGTGACAGCAAAATGCCGAGCGTCCATCAGAAAGAATGTAAACTCCAAGAGAAGCCACCTCAGGTTT*CCTGTATTGACTGTCAAGGAATCATGGAACC*ATGTTTACTTCTCAGACATATGGACGAGATTAAAAAAAGGATGGATGAATGTACCCTGACAGAAGA*TAATCATTTCACTGGGGGAGGACATTCACGGTTCTAAAAATCAGGAAATGGACACCAGCAACAAACTGGATGTCTTGGATGCATCTGAGATGTAAAAAGGATCAAGGACAATTGCAACTGGCCATTTGAAGAAGAAGATGATGTACATAACAGATAATTTTCAAAAATCTTTTACATGTTGCATTTAATATATATATTATATAT*TGACATATTGATATTAATATTATTAATGATCCCTTCTTGCCAC*GACACATGGAACTGCTCATGAATCTTCTTGATGAATCATTGCTGAATCAATGTGAACAACTGGATGCCTCCCACCCTA*CCCTCCTGTTTTGGGCCATTGGTGTACTTCCATTTCCATGGATGTTCCTCAAATCAGGTGCTTTGACATTGGCCCTCTTATGTTCAAAGTCGCATTGCCCATATGACGCTTTGTTTCAA
                                             ---------------------------------------------------------------------------------------------------------------------------------------------------------------------------------------------------------------------------------------------------------------------------------------------------------------------------------------------------------------------------------------------------------------------------------------------------------------------------------------------------------------------------------------------------------------------------------------------------------------------------------------------------------------------------------------------------------------------------------------------------------------------------------------------------------------------------------------------------------------------------------
      gi|27494089|gb|CA967532.1|CA967532     LLLLLLLLLLLLLLLLLLLLLLLLLLLLLLLLLLLLLLLLLLLLLLLLLLLLLLLLLLLLLLLLLLLLLLLLLLLLLLLLLLLLLLLLLLLLLLLLLLLLLLLLLLLLLLLLLLLLLLLLLLLLLLLLLLLLLLLLLLLLLLLLLLLLLLLLLLLLLLLLLLLLLLLLLLLLLLLLLLLLLLLLLLLLLLLLLLLLLLLLLLLLLLLLLLLLLLLLLLLLLLLLLLLLLLLLLLLLLLLLLLLLLLLLLLLLLLLLLLLLLLLLLLLLLLLLLLLLLLLLLLLLLLAAGGCACCTGAGGTCT*CCTGCATTGACTGCCACGGAATCATGGTACC*CTGTTGACTTGTCAAACGTAAGGAACAGATTAAACAGAGGATGGATTAATGTTCCCCTACAGAGGA*TAATTATTTCATTGGGGGAGCACATTCACTGTTCCAAAAATCACGAGATGGACACCAGCTACAACCTGGATGTCTTGGATGCATCTGAGATGTACTAAGGATCATTGACAATTGCGACTACTCATTCGACGATGAAGATGATGTACATAACAGATAATTTATACGAAGCCTTTACATGTTATATTGAATATATATATTATATCTATGACATATTGATTTTA*TATGATAAAAGATCCCTTCTTGCCAC*GACACATGGAACTGCTCATGAATCTTCTTGATGAATCATTGCTGAATCAATGTGAACAACTGGATGCCTCCCACCCTA*CCCTCCTGTTTTGGGCCATTGGTGTACTTCCATTTCCATGGATGTTCCTCAAATCAGGTGCTTTGACATTGGCCCTCTTATGTTCAAAGTCGCATTGCCCATATGACGCTTTGTTTCAA
      gi|50740923|gb|CA967088.2|CA967088     GGGGAGTTACTGGTCAAGATGAGAGGCTTACTGTTCCTGCTCAACGCTCTGCTCCTGCTGGAGTCAACAAAGGGATTGATGAAATATGATGAGTTAAATGATCATGACAGAGAAATTGTTGACAGGGCAATAGAACAAGCCAATAAGGATTTTGGAAAAA*CCAAACACCTTGACTTTTACACCATTGTCAATAGAAATAAAGATATGGTCAATGTGATCCTGAGATCCACCTCATGTGACAGCAAAATGCCGAGCGTCCATCAGAAAGAATGTAAACTCCAAGAGAAGCCACCTCAGGTTTTCCTGTATTGACTGTCAAGGAATCATGGAACC*ATGTTTACTTCTCAGACATATGGACGAGATTAAAAAAAGGATGGATGAATGTACCCTGACAGAAGA*TAATCATTTCACTGGGGGAGGACATTCACGGTTCTAAAAATCAGGAAATGGACACCAGCAACAAACTGGATGTCTTGGATGCATCTGAGATGTAAAAAGGATCAAGGACAATTGCAACTGGCCATTTGAAGAA*AA************AA****TAATTTTCAAAAATCTTTTACATGTTGCATTTAATATATATATTATATAT*TGA**TATTGATATTAATATTATTAATGATCCCTTCTTGGGACAGAGACAAGGAAATGCTCATGAATATTTTTTTTTATT*ATTGCTGTAACA*TGTGAATAACTGGATGCCCCCTCCCCTTTCCCTCCTTTTTTGGGTCATTGATTTACTTCCCATTCCAT                                                                                
      gi|50733783|gb|CA970464.2|CA970464      GGGGGTTACTGGTCAAGATGAGAGGCTTACTGTTCCTGCTCAACGCTCTGCTCCTGCTGGAGTCAACAAAGGGATTGA***AATATGATGAGTTAAATGATCATGACAGAGGAATTGTTGACAGGGCAATAGACCGAGCCAATAAGGATTATGGAAAAA*CCAAACACCTTGACTTTTACACCATTGTCAATAGAAATAAAGATATGGTCAATGTGATCCTGAGATCCACCTCGTGTGACAGCAAAACACCGAGTGTCCATCAGAAAGACTGTGAACTCCACAAGGAGCCACCTCAGGTTT*CCTGTATTGACTGTAAAGGAACCATGGAACC*ATGTTTACTTCTCAAACATATGGACGAGATTAAAAAAAGGGCGGAGAAATGTTCCCCGTCA*ATGAATAGTCATCTTTCTGGGGGAGCACATTCACTGTACCAAAAATCAGGAAATGGACACCAGCAACAAACTGGATGTCTTGGATGTATCTGAGATGTAAAAAGGATCAAGGACAATTGCAACTAGCCATTTGAAGAAGAALLLLLLLLLLL                                                                                                                                                                                                                                                                                                            
      gi|50734649|gb|CA968482.2|CA968482                                  LCTGTTCCTGCTCAACGCTCTGCTCCTGCTGGAGTCAACAAAGGGATTGACCAAATATTATGAGTTAAATGATCATGGCACACAAATTGTTGGCGGCGGGGTAAAACAAACCAATAACGATTTTTGAAAAAACCAAACACCTTGACTTTTACACCATTGTCAATACAAATAAACATATGGTCAATGTGATCCTGAGATCCACCTCATGTGACAGCAAAATGCCGAGCGTCCATCATAAAGAATGTAAACTCCAATAGAACCCACCTCAGGTTT*CCAGTATTGACTGTCAAGGAATCATGGAACCGAGGGGTACTTCTCTCACATATGGACGAGATTAAAAAAAGGATGGATGAATGTACCCTGACACAAAA*TAATCATTTCACTGGGGGAGGACATTCACGGTTCTAAAAATCAGGAAATGGACACCACCAACAAACTGGATGTCTTGGATGCATCTCAGATGTAAAAAGGATCAAGGACAATTGCAACTGGCCATTTGAA*AA*AA************AA***ATAATTTTCAAAAATCCTTTACATGTTGCATTTAATATATATATTATATAT*TGA**TATTGATATTAATATTATTAATGATC                                                                                                                                                                                                                   

Putative SNPs: 388T>A, 392C>T, 423C>G, 432T>G, 437C>T, 522A>G

24.
                                                                                                                                                100                                                                                                 200                                                                                                 300                                                                                                 400                                                                                                 500                                                                                                 600                                                                                                 700
                                             .........+.........+.........+.........+.........+.........+.........+.........+.........+.........|.........+.........+.........+.........+.........+.........+.........+.........+.........+.........|.........+.........+.........+.........+.........+.........+.........+.........+.........+.........|.........+.........+.........+.........+.........+.........+.........+.........+.........+.........|.........+.........+.........+.........+.........+.........+.........+.........+.........+.........|.........+.........+.........+.........+.........+.........+.........+.........+.........+.........|.........+.........+.........+.........+.........+.........+.........+.........+.........+.........|.........+.........+.........+.........+.........+.........+.........+.........+.
        Cyprinus_Cluster7980.seq.Contig1     TGTCTTGTAGAGGACGTTGGAGTCACAGTCACGATGGGCTCTATATCAAATATTAATTTTAAAACAGCAAGCACCTACAGAAAATCGAGCCACCATG*TTCTCCCGCATCGCTAGACCTACCGCCACCCTCCTCCGGAGCCTGTCCACCTCCTCCCAGCACAATGCGAAAGTAGCTGTTTTGGGTGCCTCAGGTGGCATCGGGCAGCCCCTGTCTCTCCTGCTGAAGAACAGCCCTTTAGTGAGCGAGCTTTCGCTCTACGATATTGCTCACACTCCTGGAGTAGCTGCTGACCTCAGTCACATTGAGACCAGAGCCACTGTCACAGGATACATGGGAGCAGATCAGCTGGGTGCTGCACTGAAAGGTTGTGAAGTTGTTGTCATCCCTGCTGGTGTCCCAAGGAAGCCTGGTATGACCCGTGATGATCTGTTTAACACCAATGCCACCATTGTGGCCACATTAGCTGATGCTTGTGCCCGTCACTGTCCTCAGGCCATGATCTGCATCATTTCAAACCCAGTGAACTCCACCATCCCGATCACATCAGAGGTGATGAAGAAACATGGCGTCTACAACCCCAACAGAGTCTTTGGTGTCACAACACTGGATATTGTCAGAGCAAACGCTTTTGTTGCTGAGCTCAAAGGCCTTGATCCCGCCAGAGTCAACGTGCCTGTTGTTGGAGGTCATGCAGGAAAGACCATCATTCCTCTCATTTCACAGTGCACTCCCAAGGGTTGAGTTCCCTACAGATCAGCTGTCTGCTTTGACAGGCCGTA
                                             -------------------------------------------------------------------------------------------------------------------------------------------------------------------------------------------------------------------------------------------------------------------------------------------------------------------------------------------------------------------------------------------------------------------------------------------------------------------------------------------------------------------------------------------------------------------------------------------------------------------------------------------------------------------------------------------------------------------------------------------------------------------------------------------------------------
      gi|50742674|gb|CF660620.2|CF660620     TGTCTTGTAGAGGACGTTGGAGTCACAGTCACGATGGGCTCTATATCAAATATTAATTTTAAAACAGCAAGCACCTACAGAAAATCGAGCCACCATG*TTCTCCCACATCGCTAGACCTACCGCCACCCTCTTCCGGAGCCTGTCCACCTCCTCCCAGCACAATGCAAAAGTAGCTGTTTTGGGTGCCTCAGGTGGCATCGGGCAGCCCCTGTCTCTCCTGCTGAAGAACAGCCCTTTAGTGAGCGAGCTTTCACTTTACGATATTGCCCACACTCCTGGAGTAGCTGCTGACCTCAGTCACATTGAGACCAGAGCCACCGTCACAGGCTACATGGGAGCGGATCAGCTGGGTGCTGCACTGAAAGGCTGTGAAGTTGTTGTCATCCCTGCTGGTGTCCCAAGGAAGCCTGGTATGACCCGTGATGATCTGTTTAACACCAATGCCACCATCGTGGCCACATTAGCTGATGCTTGTGCCCGTCACTGCCCTCCGGCCATGATCTGCATCATTTCAAACCCTGTGAACTCCACTATCCCAATCACATCAGAGGTGATGAAGAAACATGGCGTCTACAACCCCAACAGAGTCTTTGGTGTCACAACACTTGATATTGTCAGAGCAAACGCTTTTGTTGCTGAGCTCAAAGGCCTTGATCCCGCCAGAGTCAACGTGCCCGTTGTTGGAGGTCATGCAGGAAAGACCATCATTCCTCTCATTTCACAGTGCACTCCCAAGG*TTGAGTTCCCTACAGATCAGCTGTCTGCTTTGA         
      gi|50742106|gb|CF662977.2|CF662977                                GTCAGGAGGGGCTCTATATCAAATATTAATTTTAAAACAGCAAACACCTACAGAAAATCAAGCCACCATGGTTCTCCCGCATCGCTAGACCTACCGCCACCCTCCTCCGGAGCCTGTCCACCTCCTCCCAGCACAATGCGAAAGTAGCTGTTTTGGGTGCCTCAGGTGGCATCGGGCAGCCCCTGTCTCTCCTGCTGAAGAACAGCCTTTTAGTGAGCGAGCTTTCACTTTACGATATTGCCCACACTCCTGGAGTAGCTGCTGACCTCAGTCACATCGAGACCAGAGCCACCGTCACAGGCTACATGGGAGCAGATCAGCTGGGTGCTGCACTGAAAGGCTGTGAAGTTGTTGTCATCCCTGCTGGTGTCCCAAGGAAGCCTGGTATGACCCGTGATGATCTGTTTAACACCAATGCCACCATTGTGGCCACATTAGCTGATGCTTGTGCCCGTCACTGCCCTCAGGCCATGATCTGCATCATTTCAAACCCAGTGAACTCCACTATCCCAATCACATCAGAGGTGATGAAGAAACATGGCGTCTACAACCCCAACAGAGTCTTTGGTGTCACAACACTGGATATTGTCAGAGCAAACGCTTTTGTTGCTGAGCTCAAAGGCCTTGATCCCGCCAGAGTCAACGTGCCTGTTGTTGGAGGTCATGCAGGAAAGACCATCATTCCTCTCATTTCACAGTGCACTCCCAAGGGTTGAGTTCCCTACAGATCAGCTGTCTGCTTTGACAGGCCGTA
      gi|50734425|gb|CA968275.2|CA968275                                  LLLLLLLGGCTCTATATCAAATATTAATTTTAAAACAACAAGCACTAACAGAAAATCGAGCCAGCATG*TTCTCCCGCATCGCCAGAGCAACCGCCACCCTCATCCGGGGCTTGTCCACCTCCTCCCAGCACAATGCGAGAGTAGCTGTCTTGGGTGCCTCAGGTGGCATCGGGCAGCCCCTGTCCCTCCTGCTGAAGAACAGCCCTTTAGTGAGCGAGCTTTCGCTCTACGATATTGCTCACACTCCTGGAGAGGCTGCTGACCTCAGTCACATTGAGACCAGAGCCACTGTCACAGGATACATGGGAGCAGATCAGCTGGGTGCTGCACTGAAAGGTTGTGAAGTTGTTGTCATCCCTGCTGGTGTCCCAAGGAAGCCTGGTATGACCCGTGATGATCTGTTTAACACCAATGCCACCATTGTGGCCACATTAGCTGATGCTTGCGCCCGTCACTGTCCTCAGGCCATGATCTGCATCATTTCAAACCCAGTGAACTCCACCATCCCGATCACATCAGAGGTGATGAAGAAACATGGCGTCTACAACCCCAACAGAGTCTTTGGTGTCACAACACTGGATATTGTCAGAGCAAACACTTTTGTTGC                                                                                                                                                
       gi|6438095|gb|AU081390.1|AU081390                                                                                                                                                                                                                               LLGCTGAAGAACAGCCCTTTAGTGAGCGAGCTTTCGCTCTACGATATTGCTCACACTCCTGGAGTGGCTGCTGACCTCAGTCACATTGAGACCAGAGCCACTGTCACAGGATACATGGGAGCAGATCAGCTGGGTGCTGCACTGAAAGGTTGTGAAGTTGTTGTCATCCCTGCTGGTGTCCCAAGGAAGCCTGGTATGACCCGTGATGATCTGTTTAACACCAATGCCACCATTGTGGCCACATTAGCTGATGCCTGTGCCCGTCACTGTCCTCAGGCCATGATCTGCATCATTTCAAACCCAGTGAACTCCACCATCCCGATCACATCAGAGGTGATGAAGAAACATGGTGTCTACAACCCCAACAGAGTCTTTGGTGTCACAACACTGGATATTG                                                                                                                                                                      

Putative SNPs: 254A>G,  257T>C, 269C>T, 284A>G, 320C>T, 329C>A, 368C>T, 488C>T, 533T>C, 539A>G

25.
                                                                                                                                                100                                                                                                 200                                                                                                 300                                                                                                 400                                                                                                 500                                                                                                 600                                                                                                 700                                                                                                 800
                                             .........+.........+.........+.........+.........+.........+.........+.........+.........+.........|.........+.........+.........+.........+.........+.........+.........+.........+.........+.........|.........+.........+.........+.........+.........+.........+.........+.........+.........+.........|.........+.........+.........+.........+.........+.........+.........+.........+.........+.........|.........+.........+.........+.........+.........+.........+.........+.........+.........+.........|.........+.........+.........+.........+.........+.........+.........+.........+.........+.........|.........+.........+.........+.........+.........+.........+.........+.........+.........+.........|.........+.........+.........+.........+.........+.........+.........+.........+.........+.........|.........+.........+.........+.........+.........+.........+.........+.........+.........+..
        Cyprinus_Cluster7986.seq.Contig1     GGGGGCAGAGGAAGATGGCGTCCGGCGTGAGGCAGGAGCTCGCACAGCTGATGAACTGTAGCGGCTCTCACAAAAGATCTAAGCTGGGAAGTATGTCATTTCAAGTCATTGACTGATATTGTTACCCACTGTCCGTCTACTGCACGAATGAACTGCTGTGTGGGTATTCCGTCGGAGAGAAGTGATGCTGCAGGCCAACATCAGCTCGCGTGAGGAGATGCAGCTCAGAGGATCTCTCTGTCAACAACATGCCTACACTAGCTTTACGACTATCGGAAGAAGTTACACGTGCAAAGTTGATATTATTAATGGATATCGTCAAATATTAGAAAAGGCTCTGCAGTTTATTGATGCAGAACAACTTGAGGCACTGAAAGCATTTGTTGAAGCGATGGTCAATGAGAACGTCAGCCTGGTCATATCCAGACAGCTGTTGACAGACTATTGCACGCACCTTCTCAACCTGCCGGACGGCACTGCGAAAGCCGTGTGTCACTTCACCCTGGAGAAGATCCAACCCAGAGTCATCTCATTTGAAGAACAGGTGGCTTCTATCAGACAGCATCTAGCCGCAATCTACGAGAAAGAGGAGGACTGGAGGAACGCCGCGCAGGTTCTTGTGGGAATCCCGCTGGAGACGGGTCAGAAACAGTACAATGTGGACTATAAATTGGACACTTATCTGAAAATCGCCCGTCTGTATTTGGAGGACGATGACCCGGTTCAGGCCGAGGCCTACATCAACCGAGCTTCTTTACTTCAGAATGAATCCACCAATGAACAGCTGCAGATTCACTACAAGGTCTGTTACTCCAGAGTTCTGGACTATCGGAGGAAGTTCATTGAAGCAGCTCAGCGCTACAATGAGCTTTCTTACAAATCCATCGTCCAT
                                             ----------------------------------------------------------------------------------------------------------------------------------------------------------------------------------------------------------------------------------------------------------------------------------------------------------------------------------------------------------------------------------------------------------------------------------------------------------------------------------------------------------------------------------------------------------------------------------------------------------------------------------------------------------------------------------------------------------------------------------------------------------------------------------------------------------------------------------------------------------------------------------------------------------------------------
     gi|109282519|gb|EC393830.1|EC393830     GGGGGCAGAGGAAGATGGCGTCCGGCGTGAGGCAGGAGCTCGCACAGCTGATGAACTGTAGCGGCTCTCACAAAAGATCTAAGCTGGGAAGTATGTCATTTCAAGTCATTGACTGATATTGTTACCCACTGTCCGTCTACTGCACGAATGAACTGCTGTGTGGGTATTCCGTCGGAGAGAAGTGATGCTGCAGGCCAACATCAGCTCGCGTGAGGAGATGCAGCTCAGAGGATCTCTCTGTCAACAACATGCCTACACTAGCTTTACGACTATCGGAAGAAGTTACACGTGCAAAGTTGATATTATTAATGGATATCGTCAAATATTAGAAAAGGCTCTTCAGTTTACAGACGCAGAACAACTTGAGGCACTGAAAGCATTTGTTG****GATGGTCAATGAGAACGTCAGCCTGGTCATATCCAGACAGCTGTTGACAGACTTCTGCACGCACCTCCTAAACCTGCCGGACGGCACTGCGAAAGCCGTGTGTCACTTCACCCTGGAGAAGATCCAGCCCAGAGTCATCTCATTTGAAGAACAGGTGLLLLLLLLLLLLLLLLLLLLLLLLLLLLLLLLLLLLLLLLLLLLLLLLLLLLLLLLLLLLLLLLLLLLLLLLLLLLLLLLLLLLLL                                                                                                                                                                                                                                                                   
      gi|50740863|gb|CA967025.2|CA967025                                                                                                                                                                                                                                   LLLLLLLLLLLLLLLLLLLLLLLLLLLLLLLLLLLLLLLLLLLLLLLLLLLLLLLLLLLLLLLLLLLLLLLLLLLLLLLLLLLLLLLLLLATATCGTCAAATATTAGAAAAGGCTCTGCAGTTTATTGATGCAGGAGA*CTTGAGGCACTGAAAGCATTTGTTGAAGCGATGGTCAATGAGAACGTCAGCCTGGTCATATCCAGACAGCTGTTGACAGACTATTGCACGCACCTTCTCAACCTGCCGGACGGCACTGCGAAAGCCGTGTGTCACTTCACCCTGGAGAAGATCCAACCCAGAGTCATCTCATTTGAAGAACAGGTGGCTTCGATCAGACAGCATCTAGCCGCAATCTACGAGAAAGAGGAGGACTGGAGGAACGCCGCGCAGGTTCTTGTGGGAATCCCGCTGGAGACGGGTCAGAAACAGTACAATGTGGACTATAAATTGGACACTTATCTGAAAATCGCCCGTCTGTATTTGGAGGACGATGACCCGGTTCAGGCCGAGGCCTACATCAACCGAGCTTCTTTACTTCAGAATGAATCCACCAATGAACAGCTGCAGATTCACTACAAGGTCTGTTACTCCAGAGTTCTGGACTATCGGAGGAAGTTCATTGAAGCAGCTCAGCGCTACAATGAGCTTTCTTACAAATCCATCGTCCAT
      gi|50738931|gb|CA965550.2|CA965550                                                                                                                                                                                                                                                  LLLLLLLLLLLLLLLLLLLLLLLLLLLLLLLLLLLLLLLLLLLLLLLLLLLLLLLLLLLLLLLLLLLLLLLLLLLATATCGTCAAATATTAGAAAAGGCTCTGCAGTTTATTGATGCAGAACAACTTGAGGCACTGAAAGCATTTGTTGAAGCGATGGTCAATGAGAACGTCAGCCTGGTCATATCCAGACAGCTGTTGACAGACTATTGCACGCACCTTCTCAACCTGCCGGACGGCACTGCGAAAGCCGTGTGTCACTTCACCCTGGAGAAGATCCAACCCAGAGTCATCTCATTTGAAGAACAGGTGGCTTCTATCAGACAGCATCTAGCCGCAATCTACGAGAAAGAGGAGGACTGGAGGAACGCCGCGCAGGTTCTTGTGGGAATCCCGCTGGAGACGGGTCAGAAACAGTACAATGTGGACTATAAATTGGACACTTATCTGAAAATCGCCCGTCTGTATTTGGAGGACGATGACCCGGTTCAGGCCGAGGCCTACATCAACCGAGCTTCTTTACTTCAGAATGAATCCACCAATGAACAGC                                                                                                           
      gi|50734490|gb|CA968341.2|CA968341                                                                                                                                                                                                                                                                  LLLLLLLLLLLLLLLLLLLLLLLLLLLLLLLLLLLLLLLLLLLLLLLLLLLLLLLLLLGATATCGTCTAATATTAGAGAGGGCTCTTCAGTATATTGATGCAGAACAACTTGATGCACTGAAAGCATTTGTTGAAGCGATGGTCAATGAGAACGTCAGCCTGGTCATATCCAGACAGCTGTTGACAGACTATTGCACGCACCTTCTCAACCTGCCGGACGGCACTGCGAAAGCCGTGGGTCACTTCATCCTGGAGAAGATCCAGCCCAGATTCATCTCATTTGAA                                                                                                                                                                                                                                                                                                                                                                  

Putative SNPs: 340T>G, 517G>A

26.                                                                                                                                          100                                                                                                 200                                                                                                 300                                                                                                 400
                                             .........+.........+.........+.........+.........+.........+.........+.........+.........+.........|.........+.........+.........+.........+.........+.........+.........+.........+.........+.........|.........+.........+.........+.........+.........+.........+.........+.........+.........+.........|.........+.........+.........+.........+.........+.........+.........+.........+.........+.........|.........+.........+.........+.........+.........+.........+....
        Cyprinus_Cluster7988.seq.Contig1     ACGAATGCACTGATGCTTCAAGATTTATAATATCACCCAGGAAGTATTGGTTAGAAGGTCTCTCGAATCTCCAGTCATCAGTCATGAGTTTGAGGGAGAAGACAAAGATCTCCTCTGCAACTTCAGTAGAGGTATATGGGGTCCAAGTGGGCCCCAAGGAATCGCTGCTCACATTATGCTTTCTTGAATAGTGACACTCG*ATACCAACCACCGCACTACTGCTCCTAACAATAGGAACACCATAGGAAAGTTCTTGTGGGGTGTAGATAAGTTTGAAGGTATAGACAAGCTCATCATTAGTCACCGTT*ACTATACTGCCACATCCATGCAGTTCAGACTCAAAGATAAGCACTTGAGCAGAAGGGTCTTCTCCAGTTGCAATACAACCTCCCAGTGTAAAAGCAGAGGGCATTAGTAGTTGTCCAGTGCCAAAGAAGTCTTTCAACACTTCCACATATATTG
                                             --------------------------------------------------------------------------------------------------------------------------------------------------------------------------------------------------------------------------------------------------------------------------------------------------------------------------------------------------------------------------------------------------------------------------------------------------------------------------------
       gi|6438135|gb|AU081430.1|AU081430     ACGAATGCACTGATGCTTCAAGATTTATAATATCACCCAGGAAGTATTGGTTAGAAGGTCTCTCGAATCTCCAGTCATCAGTCATGAGTTTGAGGGAGAAGACAAAGATCTCCTCTGCAACTTTAATAGAGGTATATGGGGTCCAAGTGGGCCCCAAGGAATCGCTGCTCACATTATGCTTTCTTGAATAGTGACACTCG*ATACCAACCACCGCACTACTGCTCCTAACAATAGGAACACCATAGGAAAGTTCTTGTGGGGTGTAGATAAGTTTGAAGGTATAGACAAGCTCATCATTAGTCACCGTT*ACTATACTACCACATCCATGCAGTTCAGACTCAAAGATAAGCACTTGAGCAGAAGGGTCTTCTCCAGTTGCALL                                                                                
       gi|6438158|gb|AU081453.1|AU081453     ACGAATGCACTGATGCTTCAAGATTTATAATATCACCCAGGAAGTATTGGTTAGAAGGTCTCTCGAATCTCCAGTCATCAGTCATGAGTTTGAGGGAGAAGACAAAGATCTCCTCTGCAACTTCAGTAGAGGTATATGGGGTCCAAGTGGGCCCCAAGGAATCGCTGCTCACATTATGCTTTCTTGAATAGTGACACTCG*ATACCAACCACCGCACTACTGCTCCTAACAATAGGAACACCATAGGAAAGTTCTTGTGGGGTGTAGATAAGTTTGAAGGTATAGACAAGCTCATCATTAGTCACCGTT*ACTATACTGCCACATCCATGCAGTTCAGACTCAAAGATAAGCACTTGAGTAGAAGGGTCTTCTCCAGTTGCALL                                                                                
       gi|6438126|gb|AU081421.1|AU081421                                           AGGAAGTATTGGTTAGAAGGTCTCTCGAATCTCCNGTCATCAGTCATGAGTTTGAGGGAGAAGACAANGATCTCCTCTGCAACTTCAGTAGAGGTATATGGGGTCCAAGTGGGCCCCAAGGAATCGCTGCTCACATTATGCTTTCTTGAATAGTGACACTCGGATACCAACCNCCGCACTACTGCTCCTAACAATAGGAACACCATAGGAAAGTTCTTGTGGGGTGTAGATAAGTTTGAAGGTATAGACAAGCTCATCATTAGTCACCGTT*ACTATACTGCCACATCCATGCAGTTCAGACTCAAAGATAAGCACTTGAGCAGAAGGGTCTTCTCCAGTTGCALL                                                                                
       gi|6438170|gb|AU081465.1|AU081465                                                  LLTGGTTAGAAGGTCTCTCGAATTGCCAGTCATCAGTCATGAGCCTGAGGGAGAACACAAAGATCTCCTCTGCAGCTTTAGAAGCGGCATATGGGATCCAATTGGGCATTAAGGCATCGCTACTCACATTATGCTCTCTTGAATAGTGACACTCG*ATACCAACCACTGCACTACTGCTCCTAACAATAGGAACACCAAATAAAACCTCTTGTGGGGTGTAGATGATGGAGAACGTATAGATGAGTTCATCCTCAGTCACCAACGAC*ATGCTGCCACATCCATGCAGTTCTGACTCAAAGATGAGCACTTGAGCAGAAGGACCCTCTCCAGTTGCAATACAACCTCCCAGTGTAAAAGCAGAGGGCATTAGTAGTTGTCCAGTGCCAAAGAAGTCTTTCAACACTTCCACATATATTG

Putative SNPs: 124T>C

27.
                                                                                                                                                100                                                                                                 200                                                                                                 300                                                                                                 400                                                                                                 500                                                                                                 600
                                             .........+.........+.........+.........+.........+.........+.........+.........+.........+.........|.........+.........+.........+.........+.........+.........+.........+.........+.........+.........|.........+.........+.........+.........+.........+.........+.........+.........+.........+.........|.........+.........+.........+.........+.........+.........+.........+.........+.........+.........|.........+.........+.........+.........+.........+.........+.........+.........+.........+.........|.........+.........+.........+.........+.........+.........+.........+.........+.........+.........|.........+.....
        Cyprinus_Cluster7990.seq.Contig1     CGGCCGCCGGGAGACAA*CTGAAAGAGAAGTGTGCATTACAGTCACCGACAGGGTCAGGGCTTGTCTGCGTTCACGCGTTTGACTGCCACATCATTTTTTTAGACGCTGAATGTAAGAT*TTCCTTTGACATCCCGGCATGGGTAATGTTAGTTTTTATGTAGGCAGCTGGCTAGCTCTCAGGTTAGCTCACACATTGAGAAAGAGAGCGAGATATAAAGGGCGCTAGTTACTCAGGAGCCACTAACGTTACACCCAGCGGGAAGATGGCGCTTAAACGAATCAATAAGGAACTGAATGATTTGGCACGTGATCCTCCTGCACAGTGCTCTGCAGGTCCAGTGGGGGATGATGTGTTCCACTGGCAGGCCACAATCATGGGGCCGAATGAAAGTCCATATCAGGGTGGTGTTTTTTTCCTAACCATACACTTCCCAACAGATTACCCCTTTAAACCACCAAAGGTTGCATTTACTACAAGAATCTACCATCCCAACATAAACAGTAATGGCAGCATCTGTCTGGATATCCTCAGGTCCCAGTGGTCTCCTGCACTTACTATTTCTAAAGTTCTCCTGTCCATCTGCTCACTCTTATGTGACCCCAATCCAGACGA
                                             ---------------------------------------------------------------------------------------------------------------------------------------------------------------------------------------------------------------------------------------------------------------------------------------------------------------------------------------------------------------------------------------------------------------------------------------------------------------------------------------------------------------------------------------------------------------------------------------------------------------------------------------
      gi|50738385|gb|CA965135.2|CA965135     CGGCCGCCGGGAGACAA*CTGAAAGAGAAGTGTGCATTACAGTCACCGACAGGGTCAGGGCTTGTCTGCATTCACGCGTTTGACTGCCACATCATTTTTTTAGACGCTGAATGTAAGAT*TTCCTTTGACATCCCGGCATTTTTAATGTTAGTTTTTATGTAGGCAGCTGG*TATCTCTCAGGTTAGCTCACACATTGAGAAAGAGAGCGAGATATAAAGGGCGCTAGTTACTCAGGAGCCACTAACGTTACACCCAGCGGGAAGATGGCGCTTAAACGAATCAATAAGGAACTGAATGATTTGGCACGTGATCCTCCTGCACAGTGCTCTGCAGGTCCAGTGGGGGATGATGTGTTCCACTGGCAGGCCACAATCATGGGGCCGAATGAAAGTCCATATCAGGGTGGTGTTTTTTTCCTAACCATACACTTCCCAACAGATTACCCCTTTAAACCACCAAAGGTTGCATTTACTACAAGAATCTACCATCCCAACATAA*CAGTAATGGCAGCATCTGTCTGGATATCCTCAGGTCCCAGTGGTCTCCTGCACTTACTATTTCT                                                  
      gi|50733397|gb|CA967573.2|CA967573     LLLLLLLLLLLAGACAAACTGAGAGAGAAGTGTGCATTACAGTCACCGACAGGGTCAGGGCTTGTCTGCGTTCACGCGTTTGACTGCCACATCATTTTTTTAGACGCTGAATGTAAGAT*TTCCTTTGACATCCCGGCATTT*TAATGTTAGTTTTTATGTAGGCAGCTGG*TATCTCTCAGGTTAGCTCACACATTGAGAAAGAGAGCGAGATATAAAGGGCGCTA****CTCAGGAGCCACTAACGTTACACCCAGCGGGAAGATGGCGCTTAAACGAATCAATAAGGAACTGAATGATTTGGCACGTGATCCTCCTGCACAGTGCTCTGCAGGTCCAGTGGGGGATGATGTGTTCCACTGGCAGGCCACAATCATGGGGCCGAATGAAAGTCCATATCAGGGTGGTGTTTTTTTCCTAACCATACACTTCCCAACAGATTACCCCTTTAAACCACCAAAGGTTGCATTTACTACAAGAATCTACCATCCCAACATAAACAGTAATGGCAGCATCTGTCTGGATATCCTCAGGTCCCAGTGGTCTCCTGCACTTACTATTTCTAAAGTTCTCCTGTCCATCTGCTCACTCTTATGTGACCCCAATCCAGACGA
      gi|50740024|gb|CA966540.2|CA966540                    AA*CTGAAAGAGAAGTGTGCATTACAGTCACCGACAGGGTCAGGGCTTGTCTGCGTTCACGCGTTTGACTGCCACATCATTTTTTTAGACGCTGAATGTAAGAT*TTCCTTTGACATCCCGGCATGGGTAATGTTAGTTTTTATGTAGGCAGCTGG*TAGCTCTCAGGTTAGCTCACACATTGAGAAAGAGAGCGAGATATAAAGGGCGCTAGTTACTCAGGAGCCACTAACGTTACACCCAGCGGGAAGATGGCGCTTAAACGAATCAATAAGGAACTGAATGATTTGGCACGTGATCCTCCTGCACAGTGCTCTGC                                                                                                                                                                                                                                                                                          
      gi|50733883|gb|CA967840.2|CA967840                                                              LGGCCTGTCTGTATTCACACTTTTGATTGCCATATCATTTTTTTTGACTTTGAACGTAAGATGTTTCTT*GACATCCTGACATCTGTAATGTTACTTTCTATTTAGGAAGCTGGCTAGCTCTCAGGTTAGCTCACATTTTGAGAAAGAG**CGGGATTTA**GGGCGCTAGTTACTCAGGAGCCACTA******CACCCAGTGCGAAGATGGCGCTTAAACGAATCCATAAGGAATTGAATGATTTGGCACGTGATCCTCCTGCACAGTGTTCAGCAGGTCCAGTGGGGGATGATGTGTTCCACTGGCAGGCAACAATCATGGGGCCGAATGAAAGTCCATATCAGGGTGGCGTTTTTTTCCTAACCATACACTTCCCAACAGATTACCCCTTCAAACCACCAAA                                                                                                                                                         

Putative SNPs:70A>G, 175T>G

28.
                                                                                                                                                100                                                                                                 200                                                                                                 300                                                                                                 400                                                                                                 500                                                                                                 600                                                                                                 700                                                                                                 800                                                                                                 900
                                             .........+.........+.........+.........+.........+.........+.........+.........+.........+.........|.........+.........+.........+.........+.........+.........+.........+.........+.........+.........|.........+.........+.........+.........+.........+.........+.........+.........+.........+.........|.........+.........+.........+.........+.........+.........+.........+.........+.........+.........|.........+.........+.........+.........+.........+.........+.........+.........+.........+.........|.........+.........+.........+.........+.........+.........+.........+.........+.........+.........|.........+.........+.........+.........+.........+.........+.........+.........+.........+.........|.........+.........+.........+.........+.........+.........+.........+.........+.........+.........|.........+.........+.........+.........+.........+.........+.........+.........+.........+.........|.
        Cyprinus_Cluster7992.seq.Contig1     CAAGCTCCTAAGGAAATGGCCGTGCGCTTTCTGTCCGTAACGAGAAGATATCCCGTCGATTTGTGCAGGTTAACGGCAAGTGCAGTGAACAGGTCCGTCGTAGGCCTCTTCAGCACTGCAGCAGAACATCATAGTGCTGGGGATGACTGCCATGGTGACGATGGAGATGAAGACCACAGTCACTCTATGACACATGTCAGGACCTTAGAGACGAGAGCTAGAAAACTGGAAGAGCAGGTTCACGACCTCACAGAGAGATACAAACGAGCCCTAGCTGACTCAGACAATGTCAGAAGAAGAACACAGAAATTTGTTGAGGACGCCAAACTATTTGGGATTCAGAGTTTCTGCCGTGACATTGTGGAGGTGGCAGACCTGTTGGAGAAGGTTGAGGAGGGAGATGGAGCACAGCAGCTGACACAATACATGGCACACATACAGGGACGGCTGCAGGACATCTTCACCAAGCATGGACTGGAGAAGATGAGCCCCGTGGGATCCACCTACGACCCATATCAGCATGAAATAGTCTGTCATACTCCAGCAGAGGGAGTGGAGCCTGGCTCCATAGCTGTGGTGAAGCAAGACGGTTACATGCTGCATGGACGTACCATTCGTCATGCCCTTGTGGGCATAGCTGTGAAGACGCAGGAGCAGTGACAGCGCCTTAGTTCAGTCCTCTCATGCTTAGGTTTTTTTTTTTACACTCTCTCTCTTAGAGTGTATTGTTCTTGCATCTCTAGACAACTACATTTTTGACTTACTCTTTGAAGTAA*TGGTTATTTATATGTTTTTATAATTTGTGTAATCTACACAGATTAATCAGGCTTTTTTTTTTTTGTCTTTTTTTGTTTAGTTTTGAACCCCCGATTTTCAGACTGTCCAATGCCCGTTTAATGT
                                             -------------------------------------------------------------------------------------------------------------------------------------------------------------------------------------------------------------------------------------------------------------------------------------------------------------------------------------------------------------------------------------------------------------------------------------------------------------------------------------------------------------------------------------------------------------------------------------------------------------------------------------------------------------------------------------------------------------------------------------------------------------------------------------------------------------------------------------------------------------------------------------------------------------------------------------
      gi|50743150|gb|CF660962.2|CF660962     CAAGCTCCTAAGGAAATGGCCGTGCGCTTTCTGTCCGTAACGAGAAGATATCCCGTCGATTTGTGCAGGTTAACGGCAAGTGCAGTGAACAGGTCCGTCGTAGGCCTCTTCAGCACTGCAGCAGAACATCATAGTGCTGGGGATGACTGCCATGGTGACGATGGAGATGAAGACCACAGTCACTCTATGACACATGTCAGGACCTTAGAGATGAGAGCTAGAAAACTGGAAGAGCAGGTTCACGACCTCACAGAGAGATACAAACGAGCCCTAGCTGACTCAGACAATGTCAGAAGAAGAACACAGAAATTTGTTGAGGACGCCAAACTATTTGGGATTCAGAGTTTCTGCCGTGACATTGTGGAGGTGGCAGACCTGTTGGAGAAGGTTGAGGAGGGAGATGGAGCACAGCAGCTGACACAATACATGGCACACATACAGGGACGGCTGCAGGACATCTTCACCAAGCATGGACTGGAGAAGATGAGCCCTGTGGGATCCACCTACGACCCATATCAGCATGAAATAGTCTGTCATACCCCAGCAGAGGGAGTGGAGCCTGGCTCCATAGCTGTGGTGAAGCAAGACGGTTACATGCTGCATGGACGTACCATTCGTCATGCCCTTGTGGGCATAGCTGTGAAGACGCAGGAGCAGTGACAGCGCCTTAGTTCAGTCCTCTCATGCTTAGGTTTTTTTTTTTACACTCTCTCTCTTAGAGTGTATTGTTCTTGCATCTCTAGACAACTACATTTTTGACTTACTCTTTGAAGTAA*TGGTTATTTATATGTTTTTATAATTTGTGTAATCTACACAGATTAATCAGGCTTTTTTTTTTTTGTCTTTTTTTGTTTAGTTTTGAACCCCCGATTTTCAGACTGTCCAATGCCCGTTTAATGT
      gi|50739962|gb|CA966478.2|CA966478       AGCTCCTGAGGAAATGGCCGTGCGCTTTCTGTCCGTAACGAGAAGATATCCCGTCGATTTGTGCAGGTTAACGCCAAGTGCAGTCAACAGGTCTGTCGTAGGCCTCTTCAGCACTGCAGCAGAACATCATAGTGCTGGGGATGACTGCCATGGTGACGATGGAGATGAAGACCACAGTCACTCTATGACACATGTCAGGACCTTAGAGACGAGAGCTAGAAAACTGGAAGAGCAGGTTCACGACCTCACAGAGAGATACAAACGAGCCCTAGCTGACTCAGACAATGTCAGAAGAAGAACACAGAAATTTGTTGAGGACGCCAAACTATTTGGGATTCAGAGTTTCTGCCGTGACATTGTGGAGGTGGCAGACCTGTTGGAGAAGGTTGAGGAGGGAGATGGAGCACAGCAGCTGACACAATACATGGCACACATACAGGGACGGCTGCAGGACATCTTCACCAAGCATGGACTGGAGAAGATGAGCCCCGTGGGATCCACCTACGACCCATATCAGCATGAAATAGTCTGTCATACTCCAGCAGAGGGAGTGGAGCCTGGCTCCATAGCTGTGGTGAAACAAGACGGTTACATGCTGCATGGACGTACCATTCGTCATGCCCTTGTGGGCATAGCTGTG                                                                                                                                                                                                                                                                   
      gi|50739922|gb|CA966438.2|CA966438                                                                                                             LLLLLLCAGCACTGCAGCGGAACATCGTAGTGCTGGTGACGACTGCCATGGTGATGATGGAGATGATGACCACAGTCACTCTGTGACACATGTCAGGGCCTTGGAGATAAGAGCTAGAAAACTGGAAGAGAAGGGTCGCGACCTCACTGAGAGATATAAACGAGCCCTAGCTGACACAGACAATGTCAGAAGAAGAACACAGAAATTTGTAGAGGACGCCAAAATATTTGGCATTCAGAGTTTCTGCCGTGACATTGTGGAAGTGGCAGACCTGTTGGAGAAGGTTGAGGAGAGAGATGGAGTACAGCAGCTAACACAATACCTGGCTCTTTTACAGGGACGGCGGGGGGAGGTCTTCACCAAACATGGACTGGAGAAGATGAGCCCCGTGGGATCTGCCTACGACCCATATCAGCATGAAATAGTCTGTCATACTCCAGCAGAGGGAGTGGAGCCCANCACCATAGCAGTGGTGAAGCAAGACGGTTACATGCTCCATGGACGTACCATTCGCCATGCCCTTGTGGGTATAGCTGTG                                                                                                                                                                                                                                                                   
     gi|109280507|gb|EC392795.1|EC392795                                                                                                                                         LLLGCTGGGGATGACTGCCATGGTGACGATGGAGATGAAGACCACAGTCACTCTATGACACATGTCAGGACCTTAGAGACGAGAGCTAGAAAACTGGAAGAGCAGGTTCACGACCTCACAGAGAGATACAAACGAGCCCTAGCTGACTCAGACAATGTCAGAAGAAGAACACAGAAATTTGTTGAGGACGCCAAACTATTTGGGATTCAGAGTTTCTGCCGTGACATTGTGGAGGTGGCAGACCTGTTGGAGAAGGTTGAGGAGGGAGATGGAGCACAGCAGCTGACACAATACATGGCACACATACAGGGACGGCTGCAGGACATCTTCACCAAGCATGGACTGGAGAAGATGAGCCCCGTGGGATCCACCTACGACCCATATCAGCATGAAATAGTCTGTCATACTCCAGCAGAGGGAGTGGAGCCTGGCTCCATAGCTGTGGTGAAGCAAGACGGTTACATGCTGCATGGACGTACCATTCGTCATGCCCTTGTGGGCATAGCTGTGAAGACGCAGGAGCAGTGACAGCGCCTTAGTTCAGTCCTCTCATGCTTAGGGTTTTTTTAC*ACTCTCTCTCTCTTAGTGTGTATTGTTCTTACATCTCTAGACAACTACATTTTTGACTTACTCTTTGAAGTAAATGGT*ATTTATATGTATTTATAATTTGTGTAATCTACACAGATTAATCAGGCTTTTTTTTTT**GTCTTTTTT*GTTTAGTTTTGAACCCCCGATTTACAGACT                    

Putative SNPs: 212T>C

29.                                                                                                                                         100                                                                                                 200                                                                                                 300                                                                                                 400                                                                                                 500                                                                                                 600                                                                                                 700                                                                                                 800                                                                                                 900
                                             .........+.........+.........+.........+.........+.........+.........+.........+.........+.........|.........+.........+.........+.........+.........+.........+.........+.........+.........+.........|.........+.........+.........+.........+.........+.........+.........+.........+.........+.........|.........+.........+.........+.........+.........+.........+.........+.........+.........+.........|.........+.........+.........+.........+.........+.........+.........+.........+.........+.........|.........+.........+.........+.........+.........+.........+.........+.........+.........+.........|.........+.........+.........+.........+.........+.........+.........+.........+.........+.........|.........+.........+.........+.........+.........+.........+.........+.........+.........+.........|.........+.........+.........+.........+.........+.........+.........+.........+.........+.........|.........+..
        Cyprinus_Cluster8000.seq.Contig1     GCCGCGGGGACTCTTGACAGCTCTACAACACATAGTGCCTAAGAGAAAGTCTAAACATGAATGCTGTGATGGACACATTGCACGGGTTTGGAGTGAGTAGCACCCAATACCTGCAGACCCATTACAAAGATGCCCAAGGATGGTTTCTTTTCGTATCCTTTGCGGCAGATCTGAGGAACACCTTCATCATCTTCTTTCCCATCTGGTTCCATCTGAAAGAATCAGTCGGGATCAAGCTCATCTGGGTGGCTGTGATAGGAGACTGGCTCAATCTGGTCTTCAAATGGATC*CTGTTTGGAGAACG*TCCATACTGGTGGGTCCATGAGACTTCTTACTACATCAACAGCTCAACGCCACATATTGAGCAGTATC*CCATGACCTGTGAGACCGGCCCAGGAAGCCCATCTGGTCATGCTATGGGGGCTGCTGGTGTTTACTACACATTGGTCACTTCAATCCTTGCCATAATGCTAAGCAAAGAGAAGAAAACCTCGTCTAAGGGCCTATACTTGCGTGGTTCACTTTGGACGCTCTTCTGGATGGTCCAGGTCTGTGTTTGTCTCTCTCGAGTCTTCATCGCCGCTCATTTCCCACATCAAGTTTTCGCAGGAGTTATTTCAGGCATGGTTGTTGCCGAGGCCTTCAACGGACAGAAATGGATCTACAGTGCCAGTCTAAAGAATTACTTCAACATCACACTGTTCCTGCTCTCTTTTGCGGTGGCCTTGTACCTGTTTCTCAAGCTCTGGGGTGTGGATCTGCTGTGGACCTTTGAGAAGCCCAGCGGTGGTGCGTCAATCCAGCCTGGGTCCACTTGGACACAACGCCGTTCGCCAGCCTGTTGAGGAACATGGGCACCCTGTTTGGTCTGGGACTCGGCCTTCACTCTCCGCTGTACACTGAAAGCAA
                                             ------------------------------------------------------------------------------------------------------------------------------------------------------------------------------------------------------------------------------------------------------------------------------------------------------------------------------------------------------------------------------------------------------------------------------------------------------------------------------------------------------------------------------------------------------------------------------------------------------------------------------------------------------------------------------------------------------------------------------------------------------------------------------------------------------------------------------------------------------------------------------------------------------------------------------------------------
      gi|50742354|gb|CF663095.2|CF663095     GCCGCGGGGACTCTTGACAGCTCTATA*C*CATAGTGCCTTAGAGAAAGTCTAAACATGAATGCTGTGATGGACACATTGCACGGGTTTGGAGTGAGTAGCACCCAATACCTGCAGACCCATTACAAAGATGCCCAAGGATGGTTTCTTTTCGTATCCTTTGCGGCAGATCTGAGGAACACCTTCATCATCTTCTTTCCCATCTGGTTCCATCTGAAAGAATCAGTCGGGATCAAGCTCATCTGGGTGGCTGTGATAGGAGACTGGCTCAATCTGGTCTTCAAATGGATC*CTGTTTGGAGAACG*TCCATACTGGTGGGTCCATGAGACTTCTTACTACATCAACAGCTCAACGCCACATATTGAGCAGTATC*CCATGACCTGTGAGACCGGCCCAGGAAGCCCATCTGGTCATGCTATGGGGGCTGCTGGTGTTTACTACACATTGGTCACTTCAATCCTTGCCATAATGCTAAGCAAAGAGAAGAAAACCTCGTCTAAGGGCCTATACTTGCGTGGTTCACTTTGGACGCTCTTCTGGATGGTCCAGGTCTGTGTTTGTCTCTCTCGAGTCTTCATCGCCGCTCATTTCCCACATCAAGTTTTCGCAGGAGTTATTTCAGGCATGGTTGTTGCCGAGGCCTTCAACGGACAGAAATGGATCTACAGTGCCAGTCTAAAGAATTACTTCAACATCACACTGTTCCTGCTCTCTTTTGCGGTGGCCTTGTACCTGTTTCTCAAGCTC                                                                                                                                                                   
      gi|50741323|gb|CF662432.2|CF662432                    GACAGCTCTACAACACATAGTGCCTAAGAGAAAGTCTAAACATGAATGCTATGATGGACACATTGCACGGGTTTGGAGTGAGTAGCACCCAATACCTGCAGACCCATTACAAAGACGCCCAAGGATGGTTTCTTTTCGTATCCTTTGTGGCAGATCTGAGGAACACCTTCTTCATCTTCTTTCCCATCTGGTTCCATCTGAAAGAATCAGTCGGGATCAAGCTCATCTGGGTGGCTGTGATAGGAGACTGGCTCAATCTGGTCTTCAAATGGATC*CTATTTGGAGAACG*TCCATACTGGTGGGTCCATGAGACTTCCTACTACATCAACAGCTCAACGCCACATATTGAGCAGTATC*CCATGACCTGTGAGACCGGTCCAGGAAGCCCGTCTGGTCACGCTATGGGGGCTGCTGGTGTTTACTACACATTGGTCACCTCAATCCTCGCCATAATGCTGAGCAAAGAGAAGAAATCCTCATCTAAGAGCCTATACTTGCGTGGTTCACTTTGGACACTCTTCTGGACGGTCCAGGTCTGTGTTTGTCTCTCTCGGGTCTTCATCGCCGCTCATTTCCCCCATCAAGTTTTCGCAGGAGTTATTTCAGGCATGATTGTTGCCGAGGCCTTCAACAGACAGAAATGGATCTACAGTGCCACTCTGAAGAATTACTTCAACATCACTCTGTTCCTGCTCTCTTTTGCGGTGGGCTTGTACCTGCTCCTCAAGCTCTGGGGTGTGGATCTGCTGTGGACCTTTGAGAAGCCCAGCGGTGGTGCGTCAATCCAGCCTGGGTCCACTTGGACACAACGCCGTTCGCCAGCCTGTTGAGGAACATGGGCACCCTGTTTGGTCTGGGACTCGGCCTTCACTCTCCGCTGTACACTGAAAGCAA
      gi|50734709|gb|CA968534.2|CA968534                                                LLLLLLLCTAAACATGAATGCTGTGATGGACACATTGCACGGGTTTGGAGTGATTACCACCCCATACCTGCAGACCCATTACAA*GAGGGGCG*GGAGGGTTTCTTTTCTTATCCTTTGCGGCAGATCTGAGGAACACCTTCTTCATCTTCTTTCCCATCTGGTTCCATCTGAAAAAAACACTCGGGATCAACCTCATCTGGGTGGCTGTGATAAAAAACAGGCTCAATCTGGTCTTCAAATGGATC*CTGTTTG                                                                                                                                                                                                                                                                                                                                                                                                                                                                                                                                                                                                                                      
      gi|50743273|gb|CF661076.2|CF661076                                                                                                                         ACCCATTACAAAGATGCCCTCGGATGGTTTCTTTACCTCTCCTTTGCGGCTCATCTGAAGAACACCTTCATCATCTTCTTTCCCATCTGGTTCCATCTGAAAGAATCAGTCGGGATCTACCTCATCTGGGTGGCTGTGATAGGAGACTGGCTCAATCTGGTCTTCTAATGGATATCTGTTTGGAGAACTCTACCTACTGGTGGGTCCATGAGACTTCTTACTACATCAACAGTTCTACGCCACATATTGAGCAGTATCTCCTTGACCTGTGAGACCGGCCCAGGAAACCTATCTCGTCATGCTCTGGGGGCTGCTGGTGTTTACTACACATTGGACACTTCAATCCTTGCCCTACTGCTAAGCATACAGAATACAACCTCGTCTAAAGGCCTATCCGTCTGTGGTTCACTTTGCACGCTCTTCTGGATGGTCCAGGTCTGTGTTTGTCTCTCTCGACTCTTCATCGTCGCTCATTTCCCAATTCAAGTTTTCTCACGATTTACTTCACGCATGGTTGTTGCCGATGCCTTCAACGGACACAAATGGATCTACAGTGCCAGTCTAAAGAATTACTTCAACATCACACTGT                                                                                                                                                                                                               

Putative SNPs: 186A>T, 236G>C

30.
                                                                                                                                                100                                                                                                 200                                                                                                 300                                                                                                 400                                                                                                 500                                                                                                 600                                                                                                 700                                                                                                 800
                                             .........+.........+.........+.........+.........+.........+.........+.........+.........+.........|.........+.........+.........+.........+.........+.........+.........+.........+.........+.........|.........+.........+.........+.........+.........+.........+.........+.........+.........+.........|.........+.........+.........+.........+.........+.........+.........+.........+.........+.........|.........+.........+.........+.........+.........+.........+.........+.........+.........+.........|.........+.........+.........+.........+.........+.........+.........+.........+.........+.........|.........+.........+.........+.........+.........+.........+.........+.........+.........+.........|.........+.........+.........+.........+.........+.........+.........+.........+.........+.........|.........+.........+.........+.........+....
        Cyprinus_Cluster8001.seq.Contig1     ACTTATGGAGTTGGACACATCAACCCGGCACACACCATCAGTGCCGCCCTCTGCTATGCTACACAGCTCATCAATATCCTGTCTCATATTCTTGATGTCAACCTTCCGAAAAAATTG*TGCAACAGTGAGTTCTGCGGTGATAATCTGACCCGCTACCGATTCACCC*GTGCCGTAAACAAACTTAACACCAACATCCTGCACCTCTGCTT*CTCACAGCATGTTGACAGCGAGCTGCTT*CATCCTCATCACACTTTGAGGAA*TATAATATTTCTGGTGTCTCCAGCAAACAAGAAACTTGGCAGAACCGGGCCGTTTGAGGTGAG*CGCTGACTT*GGAAGACTCTATGGAGTTTGTGGAACCAGAGGCGGCTGGACCAGCGGAGGAGAGCGGAGAGGAGGCTGTGACGGATGAAGAAACAGACTTGGGCATAGACTGGGAGACGGTTCCAAGCCCTCGCTTCTGTGACATCCCTTCCCAGCCTATGGATCTGTCCCAGAGCGGCATGCACGCATCCCAGCCAATTGGCAATGCAGGGGGCATGATCTCCTCTGCGGCTGCCTCTGTCACGTCCTGGTTCCGCACCTATACCGGGCAGCGCTGAGATCCGGTGGATGTGGGGG*TGGTTCAACCGGTTAGACCTATGCAAACACCCCATTACTGTCATTCTCACTTATGTCAGCTTGGCCATTGGGAGAAATAAAGGGAAGTTTCATCTGACTGCTCATACTGAATAAATGTGTGGTTTTATTGCAGGACGGAAGAGTGTAATGAACTACTTTTGCAGCTCACTTTTTACTGTAGACACCACACACCAGTCAACTTTATCCAGTGTACATT
                                             ----------------------------------------------------------------------------------------------------------------------------------------------------------------------------------------------------------------------------------------------------------------------------------------------------------------------------------------------------------------------------------------------------------------------------------------------------------------------------------------------------------------------------------------------------------------------------------------------------------------------------------------------------------------------------------------------------------------------------------------------------------------------------------------------------------------------------------------------------------------------------
      gi|50743074|gb|CF660891.2|CF660891     ACTTATGGAGTTGGACACATCAACCCGGCACACACCATCAGTGCCGCCCTCTGCTATGCTACACAGCTCATCAATATCCTGTCTCATATTCTTGATGTCAACCTTCCGAAAAAATTG*TGCAACAGTGAGTTCTGCGGTGATAATCTGACCCGCTACCGATTCACCC*GTGCCGTAAACAAACTTAACACCAACATCCTGCACCTCTGCTT*CTCACAGCATGTTGACAGCGAGCTGCTT*CATCCTCATCACACTTTGAGGAA*TATAATATTTCTGGTGTCTCCAGCAAACAAGAAACTTGGCAGAACCGGGCCGTTTGAGGTGAG*CGCTGACTT*GGAAGACTCTATGGAGTTTGTGGAACCAGAGGCGGCTGGACCAGCGGAGGAGAGCGGAGAGGAGGCTGTGACGGATGAAGAAACAGACTTGGGCATAGACTGGGAGACGGTTCCAAGCCCTCGCTTCTGTGACATCCCTTCCCAGCCTATGGATCTGTCCCAGAGCGGCATGCAGGCATCCCAGCCAATTGGCAATGCAGGGGGCATGATCTCCTCTGCGGCTGCCTCTGTCACGTCCTGGTTCCGCACCTATACCGGGCAGCGCTGAGATCCGGTGGATGTGGGGGGTGGTTCAACCGGTTAGACCTATGCAAACACCCCATTACTGTCATTCTCACTTATGTCAGCTTGGCCGTTGGGAGAAATAAAGGGAAGTTTCATCTGACTGCTCATACTGAATAAATGTGTGGTTTTATTGCAGGACGGAAGAGTGTAATGAACTACTTTTGCAGCTCACTTTTTACTGTAGACACCACACACCAGTCAACTTTATCCAGTGTACATT
      gi|50742816|gb|CF660688.2|CF660688                          AACCCGGCACACACCATCAGTGCCGCCCTCTGCTATGCTACACAGCTTATCAATATCCTGTCTCATATTCTTGAAGTCAACCTTCCGAAAAAATTG*TGCAACAGTGAGTTCTGTGGTGATAATCTGACCCGCTACCGATTCACCC*GTGCTGTAAACAAACTTAACACCAACATCCTGCACCTCTGCTTTCTCACAGCATGTTGACAGCGAGCTGCTTTCATCCTCATCACACTTTGAGGAAATATAATATTTCTGGTGTCTCCAGCAAACAAGAAACTTGGCAGTACCGGGCCGTTTGAGGTGAGTCGCTGACTTTGGAAAACTCTATGGAGTTTGTGGAALLL                                                                                                                                                                                                                                                                                                                                                                                                                                                                                             
      gi|50743889|gb|CF661624.2|CF661624                                                                     AGCTCATCAATATCCTGTCTCATATTCTTGCCGTCAACCTTCCGAAAAAATTGATGCAACAGTGAGTTCTGTGGTGATAATCTGACCCGCTACCGATTCACCCTGTGCTGTAAACAAACTTAACACCAACATCCTGCACCTCTGCTT*CTCACAGCATGTTGACAGCGAGCTGCTT*CATCCTCATCACACTTTGAGGAA*TATAATATTTCTGGTGTCTCCAGCAAACAAGAAACTTGGCAGAACCGGGCCGTTTGAGGTGAG*TGCTGACTT*GGAAGACTCTATGGAGTTTGTGGAACCATAGGCGGCTGGACCAGCGGAGGAGAGCGGAGAGGAGGCTGTGACGGATGAAGAAACACACTTGGGCATAGACTGGGAGACGGTTCCAAGCCCTCGCTTCTGTGACATCCCTTCCCAGCCTATGGATCTGTCCCAGAGCGGCATGCACGCATCCCAGCCAATTGGCAATGCAGGGGGCATGATCTCCTCTGCGGCTGCCTCTGTCACGTCCTGGTTCCGCACCTATACCGGGCAGCGCTGAGATCCGGTGGATGTGGGGG*TGGTTCAACCGGTTAGACCTATGCAAACACCCCTTTACTGTCATTCTCACTTATGTCAGCTTGGCCATTGGGAGAAATAAAGGGAAGTTTCATCTGACTGCTCATACTGAATAAATGTGTGGTTTTAT                                                                                         
      gi|50743762|gb|CF661513.2|CF661513                                                                                          ATATTCTTGATGTCAACCTTCCGAAAAAATTG*TGCAACAGTGAGTTCTGCGGTGATAATCTGACCCGCTACCGATTCACCC*GTGCCGTAAACAAACTTATCACCAACATCCTGCACCTCTGCTT*CTCACAGCATGTTGACAGCGAGCTGCTT*CATCCTCATCACACTTTGAGGAA*TATAATATTTCTGGTGTCTCCAGCAAACAAGAAACTTGGCAAAACCGGGCCGTTTGAGGTGAG*CGCTGACTT*GGAAGACTCTATGGAGTTTGTGGAACCAGAGGCGGCTGGACCATCGGAGGAGAGCGGAGAGGAGGCTGTGACGGATGAAGAAACAGACTTGGGCATAGACTGGGAGACGGTTCCAAGCCCTCGCTTCTGTGACATCCCTTCCCAGCCTATGGATCTGTCCCAGAGCGGCATGCACGCATCCCAGCCAATTGGCAATGCAGGGGGCATGATCTCCTCTGCGGCTGCCTCTGTCACGTCCTGGTTCCGCACCTATACCGGGCAGCGCTGAGATCCGGTGGATGTGGGGG*TGGTTCAACCGGTTAGACCTATGCAAACACCCCATTACTGTCATTCTCACTTATGTCAGCTTGGCCATTGGGAGAAATAAAGGGAAGTTTCATCTGACTGCTCATACTGAATAAATGTGTGGTTTTATTG                                                                                       

Putative SNPs: 136C>T, 173C>T

31.
                                                                                                                                                100                                                                                                 200                                                                                                 300                                                                                                 400                                                                                                 500                                                                                                 600                                                                                                 700
                                             .........+.........+.........+.........+.........+.........+.........+.........+.........+.........|.........+.........+.........+.........+.........+.........+.........+.........+.........+.........|.........+.........+.........+.........+.........+.........+.........+.........+.........+.........|.........+.........+.........+.........+.........+.........+.........+.........+.........+.........|.........+.........+.........+.........+.........+.........+.........+.........+.........+.........|.........+.........+.........+.........+.........+.........+.........+.........+.........+.........|.........+.........+.........+.........+.........+.........+.........+.........+.........+.........|.........+.........+..
        Cyprinus_Cluster8008.seq.Contig1     CTCCGGGTGTTCCAGCTGTCTCGCTGACATCACAGGAAGCTCCGAGACAAATCTGATCTGATGAGGGCTGTGCCTTTGCCTTAAACTAGATATATATCATTTTATTTAGACAGTTTGCTGTGTGAGTTGTGTCTGTACTGG**TCCTCGTTATCTTCTTAAGCTCGCTG*AGGATGGCTGAGCCAAGTGGGAGATATCAGCAGCTGCCCAGTGAAGAGGAGCCGGAGGAGGGAGCTCAGGTGGCCAGTGACCCTCCGCCCCCTTACAGTAGTATTGCAGCTGACAGCGGGGTCTTCTCAAGATATTTTGATTACAAAGACGATGCAGCATTTCCCAAGCCCCCATCTTACAACGTAGCCACATCTCTACCGTCGTACGATGAGGCTGAGAGAAACAAAGCAGAGGCGACTATCCCACTGGTGTCAGGGCAAGATGATGACTTTGTGGCCAGAGATGACTTTGAGGATGCTGACCAGCTGCAGATAGGCAATGACGGCATTTTCATGTTGACATGTTTCATGGCATTCCTCTTTAACTGGATTGGCTTCTTTCTATCATTCTGCCTTACAACCTCAGCAGCGGGGCGTTATGGCGCCATATCTGGGTTTGGTCTGTCCCTCATCAAATGGATTCTCATTGTACGGTTTTCTGCTTATTTCCCTGGTTATTTTGATGGACAGTACTGGTTGTGGTGGGTGTTCCTGGTGCTCGGCATCCTGCTC
                                             --------------------------------------------------------------------------------------------------------------------------------------------------------------------------------------------------------------------------------------------------------------------------------------------------------------------------------------------------------------------------------------------------------------------------------------------------------------------------------------------------------------------------------------------------------------------------------------------------------------------------------------------------------------------------------------------------------------------------------------------------
      gi|50738245|gb|CA965046.2|CA965046     CTCCGGGTGTTCCAGCTGTCTCGCTGACATCACAGGAAGCTCCGAGACAAATCTGATCTGATGAGGGCTGTGCCTTTGCCTTAAACTAGATATATATCATTTTATTTAGACAGTTTGCTGTGTGAGTTGTGTCTGTACTGG**TCCTCGTTATCTTCTTAAGCTCGCTG*AGGATGGCTGAGCCAAGTGGGAGATATCAGCAGCTGCCCAGTGAAGAGGAGCCGGAGGAGGGAGCTCAGGTGGCCAGTGACCCTCCGCCCCCTTACAGTAGTATTGCAGCTGACAGCG*********CAGGTTATTTTGATTACAAAGACGATGCAGCATTTCCCAAGCCCCCATCTTACAACGTAGCCACATCTCTACCGTCGTACGATGAGGCTGAGAGAACCAAAGCAGAGGCGACTATCCCACTGGTGTCAGGGCAAGATGATGACTTTGTGGCCAGAGATGACTTTGAGGATGCTGACCAGCTGCAGATAGGCAATGACGGCATTTTCATGTTGACATGTTTCATGGCATTCCTCTTCAACTGGATTGGCTTCTTTCTATCATTCTGCCTTACAACCTCAGCAGCGGGGCGTTATGGCGCCATATCTGGGTTTGGTCTGTCCCTCATCAAATGGATTCTCATCGTACGGTTTTCTGCTTATTTCCCTGGTTACTTTGATGGACAGTACTGGTTGTGGTGGGTGTTCCTGGTGC              
      gi|50739267|gb|CA965781.2|CA965781                                                   LLLAATCTGATCTGATGAGGGCTGTGCCTTTGCCATTAACTAAATAT*T*TCATTTTATTTAGACAGTTTGCTGCCTGAATTGTGTCTATACTGGGATCCTCGTTATCTTTTTAAGCTGGGGGGAGGATGGCTAAGCCAANTGGGAGATATCAGCAGCTGCCCAATGAAGAGGAGCCAGAGGAGGGACCTCAGGTGGCCAGTGATCCTCCGCCCCCTTACAGTAGCATTGCAGCTGATAACG*********CAGCATATTTTGATTACAAAGACGATGCAGCATTTCCCAAGCCCCCATCCTATAATGTAGCCACATCTL                                                                                                                                                                                                                                                                                                                                                                    
      gi|50734417|gb|CA968267.2|CA968267                                                                GATGAGGGCTGCGCCTTTGCCTTAAACTAGATATATATCATTTTATTTAGACAGTTTGCTGTGTGAGTTGTGTCTGTACTGG**TCCTCGTTATCTTCTTAAGCTCGCTG*AGGATGGCTGAGCCAAGTGGGAGATATCAGCAGCTGCCCAGTGAAGAGGAGCCGGAGGAGGGAGCTCAGGTGGCCAGTGACCCTCCGCCCCCTTACAGTAGTATTGCAGCTGACAGCG*********CAGCATATTTTGATTACAAAGACGATGCAGCATTTCCCAAGCCCCCATCTTACAACGTAGCCACATCTCTACCGTCGTACGATGAGGCTGAGAGAAACAAAGCAGAGGCGACTATCCCACTGGTGTCAGGGCAAGATGATGACTTTGTGGCCAGAGATGACTTTGAGGATGCTGACCAGCTGCAGATAGGCAATGACGGCATTTTCATGTTGACATGTTTCATGGCATTCCTCTTTAACTGGATTGGCTTCTTTCTATCATTCTGCCTTACAACCTCAGCAGCGGGGCGTTATGGCGCCATATCTGGGTTTGGTCTGTCCCTCATCAAATGGATTCTCATTGTACGGTTTTCTGCTTATTTCCCTGGTTATTTTGATGGACAGTACTGGTTGTGGTGGGTGTTCCTGGTGCTCGGCATCCTGCTC
      gi|50739320|gb|CA965835.2|CA965835                                                                                                                                                                                                                               GAGCCGGAGGAGGGAGCTCAGGTGGCCAGTGACCCTCCGCCCCCTTACAGTAACATTGCAGCTGACAGCGGGGTCTTCTCAAGATATTTTGATTATAAAGACGATGCAGCATTTCCCAAGCCCCCATCTTACAACGTAGCCACATCTCTACCATCGTACGAAGAGGCTGAGAGAAACAAAACAGAGGCGACTATCCCACTGGTGT                                                                                                                                                                                                                                                                                                           

Putative SNPs: 272T>C, 301G>C

32.
                                                                                                                                                100                                                                                                 200                                                                                                 300                                                                                                 400                                                                                                 500
                                             .........+.........+.........+.........+.........+.........+.........+.........+.........+.........|.........+.........+.........+.........+.........+.........+.........+.........+.........+.........|.........+.........+.........+.........+.........+.........+.........+.........+.........+.........|.........+.........+.........+.........+.........+.........+.........+.........+.........+.........|.........+.........+.........+.........+.........+.........+.........+.........+.........+.........|.........+.........+.........+.........+.........+.........+.........+.........+........
        Cyprinus_Cluster8009.seq.Contig1     AACGACGGGGGGAGAAACACCAACGGAAACGAAG*ATTTC*TGCTGTGAACCTAACCGGGAAGAAAGTGTGAAGAATGGAGATGATGGTGTTTTTGGCAG*CTCTTCTGCCTGTTTTATTGGGCTGTGATTGCGGTCATGATGT*AGACAAACCGGTTGACTGCTCTGATGTTTATAAATCAGGAGAAAACGTCAGTGGGATTTATC*CCATCTATCCAGCAGGTGATGTTCCTGTCTGGGTTTACTGTCAGATGATCTCAGATGGGAAAGATGAAGACAAAGGAGGATGGACGGTGATTCAGAGGAGAATGGACGGCAGTGTGAATTTCTATCGGCCGTGGAATCAGTA*CAGGAGAGGATTTGGGAATGTGGAGAGAGAATACTGGCTGGGGCTGGAGAACATGTACCAGGTGACACGCAACAGGAAGTACATGCTGAGAGTGGATCTGGAGGACTTTGAAGGAAGGAAGGGTTTCGCTCTGTACTCTTCCTTCTCTGTAGATTGTGAGTGTGCTGGATATCAGCTGCATGTTTCAGGATTCACTGATGGAGGAGCAGGCGACTCTTTATCTGGCCATAATGGATA
                                             ------------------------------------------------------------------------------------------------------------------------------------------------------------------------------------------------------------------------------------------------------------------------------------------------------------------------------------------------------------------------------------------------------------------------------------------------------------------------------------------------------------------------------------------------------------------------------------------------------------
      gi|89764521|gb|DY691287.1|DY691287     AACGACGGGGGGAGAAACACCAACGGAAACGAAG*ATTTC*TGCTGTGAACCTAACCGGGAAGAAAGTGTGAAAGATGGAGATGATGGTGTTTTTGGCAGACTCTTCTGCCTGTTTTATTGGGCTGTGATTGCGGTCATGATGT*AGACAAACCGGTTGACTGCTCTGATGTTTATAAATCAGGAGAAAACGTCAGTGGGATTTAACTCCATCTATCCAGCAGGTGATGTTCCTGTCTGGGTTTATTGTCAGATGATCTCAGATGGGAAAGATGAAGACAAAGGAGGATGGATGGTGATTCAGAGGAGAATGGACGGCAGTGTGAATTTCTATCGGCCATGGAATCAGTAACAGGAGAGGATTTGGGAATGTGGAGAGAGAATACTGGCTGGGGCTGGAGAACATGTACCAGGTGACACGACACAGGAAGTACTTGCTGAGAGTGGATCTGGAGGACTTTGAAGGAAGGAAGGGTTTCGCTCTGT                                                                                                       
      gi|89500079|gb|DY655875.1|DY655875                    LLLLLLLLLLLLLACGAAGTATTTCATGCTGTGATC*TA*CCGGGAAGAAAGTGTGAAGAATGGAGATGATGGTGTTTTTGGCAG*CTCTTCTGCCTGTTTTATTGGGCTGTGATTGCGGTCATGATGT*AGACAAACCGGTTGACTGCTCTGATGTTTATAAATCAGGAGAAAACGTCAGTGGGATTTACT*CCATCTATCCAGCAGGTGATGTTCCTGTCTGGGTTTATTGTCAGATGATCTCAGATGGGAAAGATGAAGACAAAGGAGGATGGATGGTGATTCAGAGGAGAATGGACGGCAGTGTGAATTTCTATCGGCCATGGAATCAGTA*CAGGAGAGGATTTGGGAATGTGGAGAGAGAATACTGGCTGGGGCTGGAGAACATGTACCAGGTGACACGCAACAGGAAGTACATGCTGAGAGTGGATCTGGAGGACTTTGAAGGAAGGAAGGGTTTCGCTCTGT                                                                                                       
      gi|50734829|gb|CA968640.2|CA968640                          AACGGAAACGAAG*ATTTC*TGCTGTGATC*TG*CCGGGAAGAAAGTGTGAAGA*TGGAGATGATGGTGTTTTTGGCAG*CTCTTCTGCCTGTTTTATTGGGCTGTGATTGCGGTCATGATGT*AGACAAGCCGGTTGACTGCTCTGATGTTTATAAATCAGGAGAAAACGTCAGTGGGATTTATC*CCATCTATCCAGCAGGTGATGTTCCTGTCTGGGTTTACTGTCAGATGATCTCAGATGGGAAAGATGAAGACAAAGGAGGATGGACGGTGATTCAGAGGAGAATGGACGGCAGTGTGAATTTCTATCGGCCGTGGAATCAGTA*CAAGAGAGGATATGGGAACGTGGAGAGGGAATACTGGCTGGGGCTGGAGAACATGTACCAGGTGACACGCAACAGGAAGTACATGCTGAGAGTGGATCTGGAGGACTTTGAAGGAAGGAAGGGTTTCGCTCTGTACTCTTCCTTCTCTGTAGATTGTGAGTGTGCTGGATATCAGCTGCATGTTTCAGGATTCACTGATGGAGGAGCAGGCGACTCTTTATCTGGCCATAATGGATA
      gi|50736505|gb|CA970054.2|CA970054                                                               GGAAAAAAGTGTGAA*AATGGAGATGATGGTGTTTTTGGCAC*CTCTTCTCCCTGTTTTATTGGGCTGTGATTCCCCTCATGATATGAGGGGGGC*GGTTGACTGCTCTAATTTTTATAAATCAGGAGAAAACGTCAATGGGATTTATC*CCATCTATCCAGCAGGTGATGTTCCTGTCTGGGTTTACTGTCAAATGATCTCAAATGGAAAAGATGAAGACAAAGGAGGATGGACGGTGATTCACACGAAAATGGACGGCAGTGTGAATTTCTATCGGCCGTGGAATC                                                                                                                                                                                                                                                  

Putative SNPs: 152A>G, 246T>C, 293T>C, 339A>G

33.
                                                                                                                                                100                                                                                                 200                                                                                                 300                                                                                                 400                                                                                                 500                                                                                                 600                                                                                                 700                                                                                                 800                                                                                                 900                                                                                                 1000
                                             .........+.........+.........+.........+.........+.........+.........+.........+.........+.........|.........+.........+.........+.........+.........+.........+.........+.........+.........+.........|.........+.........+.........+.........+.........+.........+.........+.........+.........+.........|.........+.........+.........+.........+.........+.........+.........+.........+.........+.........|.........+.........+.........+.........+.........+.........+.........+.........+.........+.........|.........+.........+.........+.........+.........+.........+.........+.........+.........+.........|.........+.........+.........+.........+.........+.........+.........+.........+.........+.........|.........+.........+.........+.........+.........+.........+.........+.........+.........+.........|.........+.........+.........+.........+.........+.........+.........+.........+.........+.........|.........+.........+.........+.........+.........+.........+.........+.........+.........+.........|.........+.........+.........+.........+.........+....
        Cyprinus_Cluster8011.seq.Contig1     TTACGGCCGGGGTTCCTGAATTTTGGCGTCATATAACATTGTTGTGGTTTGGAGGGCGGTTAGCTTTTGCTACACAACACTGGCAAAGTTTTACCTCGTTATCGTTCATGTAAGTTAACTAATAAATTCTTCTCGCGATGGGGACAGCGGTGGGATATGCGCTCAGAAAACTTTCTGTTTATGTATCAGCTGTGGCCATGATATTATTTGCGATCGTGAATGTAACCC*TG*TTGAAACTCCTGTCCTTTCGTTTCCCCGGGACTGATGAGGAAAATCCATCTAAAAATGGGAGAGAAGTCGACGATGACTCAAAACCCCAAATTCAGATACGAAGACTGGGGTCCGACTTTCTTTTCTCTGAGGTTCATTAAAACCGTGCTCTCCGTGAACTGGTGCTCGCTGGGCCTGGAGGCGTTTGAGGGGCACGCGGCTCCGGACACAGCTTTATTCACCCTGGATGGACAAAAAACGAGCATTCATCGTTTTCTTAAAGGGAACCGTCCACTGGTTCTGAGTTTCGGAAGCTGCACCTGACCCCCATTTCTCTACAAACTTGACGAGTTCAAACAACTTGTCAAGGACTTCAGTGATGTGGCAGATTTCCTTGTTGTATACCTTGCAGAAGCGCATGCAACTGATGCTTGGGCCTTTGCAAACAACGTTGACATCAGCGTGCACAAAAACTTGGAGGAGAGACTGGCTGCGGCCCGGACCCTGGTCAAAGAGGACCCCCTCTGCCCTGTGGTAGTGGATGAGATGACCAACATCACTGTCAGCAAATACGGAGCCCTGCCTGAGCGCCTCTATGTCGTTCAGAGTGGGAAAGTTATCTATCAGGGTGGCATTGGACCTTGGGGATACAACCCTGAAGAGGTTCGAAAAGTTCTGGAGAAAACTAATTAAAAGGGAAAAAATTTAAGTTTTCTATCCATGATTGCATTGATATATTTGCACTTTTCTGAAATTCCAGTCCTTGAACTCATTTTCTGAGTCCTTGTGTTTGCTTGTGACAGATACAGATTAAACCAGCTGGTCTCTGTACCTTGATGTTT
                                             ----------------------------------------------------------------------------------------------------------------------------------------------------------------------------------------------------------------------------------------------------------------------------------------------------------------------------------------------------------------------------------------------------------------------------------------------------------------------------------------------------------------------------------------------------------------------------------------------------------------------------------------------------------------------------------------------------------------------------------------------------------------------------------------------------------------------------------------------------------------------------------------------------------------------------------------------------------------------------------------------------------------------------------------------------------------------------------------------
      gi|50739556|gb|CA966072.2|CA966072     TTACGGCCGGGGTTCCTGAATTTTGGCGTCATATAACATTGTTGTGGTTTGGAGGGCGGTTAGCTTTTGCTACACAACACTGGCAAAGTTTTACCTCGTTATCGTTCATGTAAGTTAACTAATAAATTCTTCTCGCGATGGGGACCGCAGTGGGATATGCACTGAGAAAACTTTTAGTTTATCTATCAGCTGTCGCCATGATATTATTTGCGATCGCGCATTTGACTC*TG*TTGAAACTCCTGTCAGT*CGTTTTCCCGGGACTGATGAAGAAAATCCATCTTAAAATGGGAGAGAAGTTTACGATGACCCAAAATCCCAAATTCAAATACGAAGACTGGGGTCCGAGTTTCTTTTCTCTGGCGTTCATTAAAACCGTGCTCTCCGTGAACTGGTGCTCGCTGGGCCTGGAAGCGTTTGAGGGCCACGCGGCTCCAGACACAGCTTTATTCACCCTGGACGGACAGAAAACCAGCATTCATCGTTTTCTTAAAGGAAACCGTCCACTGGTTCTGAGTTTCGGAAGCTGCACATGACCCCCATTTCTCTACAAGCTTGATGAGTTCAAACAACTTGTCAAGGATTTCAGTGATGTGGCAGATTCCCTCGTGGTTTACCCCGCAGAGGCGCATGCAACTGATGCTTGGGCCTTTGCAAACAACGT                                                                                                                                                                                                                                                                                                                                                                                                      
      gi|50743645|gb|CA966709.2|CA966709                                                                                                LLLLLLLLLLLLLLLLLLLLLLLLLLACTGATAAATTCTTCTCGCGATGGGGACAGCGGTGGGATATGCGCTCAGAAAACTTTCTGTTTATGTATCAGCTGTGGCCATGATATTATTTGCGATCGTGAATGTAACCC*TG*TTGAAACTCCTGTCCTT*CGTTTCCCCGGGACTGATGAGGAAAATCCATCTAAAAATGGGAGAGAAGTCGACGATGACTCAAAACCCCAAATTCAGATACGAAGACTGGGGTCCGACTTTCTTTTCTCTGAGGTTCACTAAAACCGTGCTCTCCGTGAACTGGTGCTCGCTGGGCCTGGAGGCGTTTGAGGGGCACGCGGCTCCGGACACAGCTTTATTCACCCTGGATGGACAAAAAACGAGCATTCATCGTTTTCTTAAAGGGAACCGTCCACTGGTTCTGAGTTTCGGAAGCTGCACCTGACCCCCATTTCTCTACAAACTTGACGAGTTCAAACAACTTGTCAAGGACTTCAGTGATGTGGCAGATTTCCTTGTTGTATACCTTGCAGAAGCGCATGCAACTGATGCTTGGGCCTTTGCAAACAACGTTGACATCAGCGTGCACAAAAACTTGGAGGAGAGATTGGCTGCGGCCCGGACCCTGGTCAAAGAGGACCCCCTCTGCCCTGTGGTAGTGGATGAGATGACCAACATCACTGCCAGCAAATACGGAGCCCTGCCTGAGCGCCTCTATGTCGTTCAGAGTGGGAAAGTTATCTATCAGGGTGGCATTGGACCTTGGGGAT                                                                                                                                                                                                 
      gi|50743854|gb|CA967152.2|CA967152                                                                                                                                 AATTCTTCTC*CGA*GGGGACAGCGGTGGGATATGCGCTCAGAAAACTTTCTGTTTATGTATCAGCTGTGGCCATGATATTATTTGCGATCGTGAATGTAACCC*TG*TTGAAACTCCTGTCCTTTCGTTTCCCCGGGACTGATGAGGAAAATCCATCTAAAAATGGGAGAGAAGTCGACGATGACTCAAAACCCCAAATTCAGATACGAAGACTGGGGTCCGACTTTCTTTTCTCTGAGGTTCATTAAAACCGTGCTCTCCGTGAACTGGTGCTCGCTGGGCCTGGAGGCGTTTGAGGGGCACGCGGCTCCGGACACAGCTTTATTCACCCTGGATGGACAAAAAACGAGCATTCATCGTTTTCTTAAAGGGAACCGTCCACTGGTTCTGAGTTTCGGAAGCTGCACCTGACCCCCATTTCTCTACAAACTTGACGAGTTCAAACAACTTGTCAAGGACTTCAGTGATGTGGCAGATTTCCTTGTTGTATACCTTGCAGAAGCGCATGCAACTGATGCTTGGGCCTTTGCAAACAACGTTGACATCAGCGTGCACAAAAACTTGGAGGAGAGACTGGCTGCGGCCCGGACCCTGGTCAAAGAGGACCCCCTCTGCCCTGTGGTAGTGGATGAGATGACCAACATCACTGTCAGCAAATACGGAGCCCTGCCTGAGCGCCTCTATGTCGTTCAGAGTGGGAAAGTTATCTATCAGGGTGGCATTGGACCTTGGGGATACAACCCTGAAGAGGTTCGAAAAGTTCTGGAGAAAACTAATTAAAAGGGAAAAAATTTAAGTTTTCTATCCATGATTGCATTGATATATTTGCACTTTTCTGAAATTCCAGTCCTTGAACTCATTTTCTGAGTCCTTGTGTTTGCTTGTGACAGATACAGATTAAACCAGCTGGTCTCTGTACCTTGATGTTT
      gi|50742964|gb|CF660832.2|CF660832                                                                                                                                                                                                                            GTGAATGTAACCCATGATTGAAACTCCTGTCCTTTCGTTTCCCCGGGACTGATGAGGAAAATCCATCTTATAATGGGAGATAAGTCTACGATGACTCACAACCCCAAATTCTTATACCAAGACGGGGGTCCGACTTTCTTTTCTCTGATGCTCATTAAAACCGTGCTCTCCGTGAACTGGTGCTCGCTGGGCCTGGATGCGCTTGATGGGTACGCGGCTCCGGACACAGCTTTATTCTCCCTGCATGGACAAGAAACTAGCATACGTCCTTTTCTTAAAGGGAACCGTCCACTGGTTCTGAGTTTCGGAAGCTGCACCTGACCCCCATTTCTCTATCAACTTGACGAGTTCAAACAACTTGTCAAGGACTTCTCTGATGTGGCTCATTTCCTTGTCGTATACCTTGCTTAATCGCATGCGACTGATGCTTGGGCCTTTGCAAACCACGTTGACTTCAACGTGCACTCTTACTTGTACGATAGACTGGCTGCGGCCCCGACCCTGGACCAAGAGGACCCCCTCTGCCCTGTGGTAGTGTATGAGATGACC                                                                                                                                                                                                                                                                                                  
Putative SNPs: 284T>A, 302T>G

34.
                                                                                                                                                100                                                                                                 200                                                                                                 300                                                                                                 400                                                                                                 500                                                                                                 600                                                                                                 700                                                                                                 800                                                                                                 900                                                                                                 1000                                                                                                1100                                                                                                1200
                                             .........+.........+.........+.........+.........+.........+.........+.........+.........+.........|.........+.........+.........+.........+.........+.........+.........+.........+.........+.........|.........+.........+.........+.........+.........+.........+.........+.........+.........+.........|.........+.........+.........+.........+.........+.........+.........+.........+.........+.........|.........+.........+.........+.........+.........+.........+.........+.........+.........+.........|.........+.........+.........+.........+.........+.........+.........+.........+.........+.........|.........+.........+.........+.........+.........+.........+.........+.........+.........+.........|.........+.........+.........+.........+.........+.........+.........+.........+.........+.........|.........+.........+.........+.........+.........+.........+.........+.........+.........+.........|.........+.........+.........+.........+.........+.........+.........+.........+.........+.........|.........+.........+.........+.........+.........+.........+.........+.........+.........+.........|.........+.........+.........+.........+.........+.........+.........+.........+.........+.........|.........+.........+.........+.........+.......
        Cyprinus_Cluster8012.seq.Contig1     TCTTTATTTTGTTTGAACCTCCAAGACTGAAACATCTACAGTTAGTGTTAAAGGTCCAGCCTTACGAAGTTGGTAGGTTGAGCCAATAAGCATCACTTCCATCTTATCACTGTTAAGACAAAGAAAATTTTGAGACATACATATTTTTATCTCAGAAATACAATGTTCCAGGAAAGCAACAGCTGGACAATCACCTGGTTTTGAGTGAATGTACACCTGGGTGTCATCTGCATAGAGGTGATAATTAAGACCACGAGATCTAAGGAGATAGCCAAGAGGAAAAATATACATACAGAAGAGTAATGGGCTCAGAAGTGATCCCTGAGGTACCCCAAATTTGGCTGAGCCAATTTTAGACTTGTATCCACCCATGGAGACAAACTGTCTGCGGTCTGAGAGGTAAGACTTGAACCACTTCAATACAGTTACCAAGTTACCAGTTACCAATACAGATACCAAACACAGATTCCAACCGAAAGAGTAAAAGAGAATTATCAACCGTGTCAAAGGCCGTGCTGAGATCAAGAAGAATCAAAATTGACAGGCAGCCAGAGTCCACGGCAAGTATGATTCTTCTGCACAATCTGACTTTGCTGCAGCCTGGAATTGAACTGCTGGTTTCGTCTGGTCAGAGGAGAACTGGCCCCCCGACTGAGCCTGGTTTCTCCCAAGGTTTTTT*CTCCATTCTGTCACCGATGGAGTTTTGGTTCCTTGCCGCTGTTGCCTCTGGCTTGCTTAGTTG**GGGACACTTCATTTACAGCGATGTCGTTGACTTGATTGAAAATGATTGCACAGATACTATTTAAACTGAACTGAGCTGAATGATGACATCACTGAATTCAATGATGAACTGCCTTTAACTGTCATTTTGCATTATTGAC*CACTGTTTTTTCCTAATTAATGTTGTTCAGTTGCTTTGACACAATCTGTTTTGTTTAAAGTGCTATATAAATAAAGGTGACTTGACTTGACTTTCAGAAGTTAGAAACATCTTTCATGTGGGCAAGCTTTACTCTAAACATTTCATAAACCAGCTTTGTCTTACAGAGAAAGAAGATTTTCAGCATATGTTGGCTTGCATTCTCTTTATTTGCTTGGTAGCACTAACATAGTGACACTGTTCACAGAAGCACTAAGCTAAACTTCCTGAACACAAAAGTTGTAACATAACTTGTTGAGAATAAACTTCTCACACATTAAGTATTGTTTTTCTGCATTCTACATAACATTCCATTTCATAATT
                                             -----------------------------------------------------------------------------------------------------------------------------------------------------------------------------------------------------------------------------------------------------------------------------------------------------------------------------------------------------------------------------------------------------------------------------------------------------------------------------------------------------------------------------------------------------------------------------------------------------------------------------------------------------------------------------------------------------------------------------------------------------------------------------------------------------------------------------------------------------------------------------------------------------------------------------------------------------------------------------------------------------------------------------------------------------------------------------------------------------------------------------------------------------------------------------------------------------------------------------------------------------------------------------------------------
      gi|50743211|gb|CF663118.2|CF663118     TCTTTATTTTGTTTGAACCTCCAAGACTGAAACATCTACAGTTAGTGTTAAAGGTCCAGCCTTACGAAGTTGGTAGGTTGAGCCAATAAGCATCACTTCCATCTTATCACTGTTAAGACAAAGAAAATTTTGAGACATACATATTTTTATCTCAGAAATACAATGTTCCAGGAAAGCAACAGCTGGACAATCACCTGGTTTTGAGTGAATGTACACCTGGGTGTCATCTGCATAGAGGTGATAATTAAGACCACGAGATCTAAGGAGATAGCCAAGAGGAAAAATATACATACAGAAGAGTAATGGGCTCAGAAGTGATCCCTGAGGTACCCCAAATTTGGCTGAGCCAATTTTAGACTTGTATCCACCCATGGAGACAAACTGTCTGCGGTCTGAGAGGTAAGACTTGAACCACTTCAATACAGTTACCAAGTTACCAGTTACCAATACAGATACCAAACACAGATTCCAACCGAAAGAGTAAAAGAGAATTATCAACCGTGTCAAAGGCCGTGCTGAGATCAAGAAGAATCAAAATTGACAGGCAGCCAGAGTCCACGGCAAGTATGATTCTTCTGCACAATCTGACTTTGCTGCAGCCTGGAATTGAACTGCTGGTTTCGTCTGGTCAGAGGAGAACTGGCCCCCCGACTGAGCCTGGTTTCTCCCAAGGTTTTTTTCTCCATTCTGTCACCGATGGAGTTTTGGTTCCTTGCCGCTGTTGCCTCTGGCTTGCTTAGTTG**GGGACACTTCATTTACAGCGATGTCATTGACTTGATTGAAAATGATTGCACAGATACTATTTAAACTGAACTGAG****ATGATGACATCACTGAATTCAATGATGAACTGCCTTTAATTGTCATTTTGCATTATTGACACACTG                                                                                                                                                                                                                                                                                                                                                                     
     gi|109278958|gb|EC392003.1|EC392003                                                                                                                                                                                                                                                                                                                                                                                                                                                                                                                                                     LLLLLLLLLLLLLLLLLLLLLLLLLLLLLLLLLLLLLLLTGAGTCCTCTGCACAATCTGACTTTGCTGCAGCCTGGAATTTAACCGCTGGTTTCGTCTGGCCAGAGGAGAACTGGCCCCCCGATTGAGCCTGGTTTCTCCCAAGGTTTTTT*CTCCATTCTGTCACCGATGGAGTTTTGGTTCCTTGCCGCTGTTGCCTCTGGCTTGCTTAGTTG**GGGACACTTCGTTTACAGCGATATCATTGACTTGATTGCAAATGATTGCACAGATACTATTTAAACTGACCTGAGCTGCATTATAACATCATTGAATTCAATGATGAATTGCCTTTAACTGTCATTTTGCATTATTGAC*CACTGTTTTTTCCTAATTAATGTTGTTCAGTTGCTTTGACACAATCTGTTTTGTTTAAAGTGCTATATAAATAAAGGTGACTTGACTTGACTTTCAGAAGTTAGAAACATCTTTCATGTGGGCAAGCTTTACTCTAAACATTTCATAAACCAGCTTTGTCTTACAGAGAAAGAAGATTTTCAGCATATGTTGGCTTGCATTCTCTTTATTTGCTTGGTAGCACTAACATAGTGACACTGTTCACAGAAGCACTAAGCTAAACTTCCTGAACACAAAAGTTGTAACATAACTTGTTGAGAATAAACTTCTCACACATTAAGTATTGTTTTTCTGCATTCTACATAACATTCCATTTCATAATT
     gi|109281854|gb|EC393487.1|EC393487                                                                                                                                                                                                                                                                                                                                                                                                                                                                                                                                                                  LLLLLLLLLLLLLLLLLLLLLLLLLATGATTCTTCTGCAGAATCTGACTTTGCTGCAGCCTGGAATTGAATTGCTGGTTTCGTCTGGTCAGAGAAGAACTGGCCCCCCGACTGAGCCTGGTTTCTCCCAAGGTTTTTT*CTCCATTCTGTCACCGATGGAGTTTTGGTTCCTTGCCGCTGTTGCCTCTGACTTGCTTAGTTG**GGGATGCTTCATTTACAGCGATGTCGTTGACTT******AAATG****CACAAATACTATTGGAACTGAACTGAGCTGAATAATGACATCACTGAAT*CAATGATGAACTGACTT***CT****TTTTGCATACTTATA*CAC*GTTTTTTCCTATTTAATTCTGTAAAGCTGCTTTGACGCAATCCGTATTGTAAAAAGCGTTATATAAATAATGGTAACTTGACTTGACTTLLLLLLLLLLLLLLLLLLLLLLLLLLLLLLLLLLLLLLLLLLLLLLLLLLLLLLLLLLLLLLLLLLLLLLLLLLLLLLLLLLLLLLLLLLLLLLLLLLLLLLLLLLLLLLLLLLLLLLLLLLLLLLLLLLLLLLLLLLLLLLLLLLLLLLLLLLLLLLLLLLLLLLLLLLLLLLLLLLLLLLLLLLLLLLLLLLLLLLLLLLL                                                                  
      gi|50734485|gb|CA968335.2|CA968335                                                                                                                                                                                                                                                                                                                                                                                                                                                                                                                                                                                                                                       LCTGCTGGTTTCGTCTGGTCGGGGGAGGGCTGGCCCCCCGTTTTCCCCTGGTTTCTCCCAAGGTTTTTT*CTCCGTTCTGTCGCCGATGGAGTTTTGGTTCCTTGCTGCTGTCGCCTCTGGTTTGCTTGGTTTTTGGGACACTTCNTTTGCAGCGGTGTCGTTGACTTGGTTGCGGATGGTTGCGCAGATGCTATTTAGACTGAGCTGGGCTGAATGATGACATCACTGAGTTCGGTGGTGGGCTGCCTTTGACTGTCATTTTGCATTGTTGGCGCACTGTTTT**CCTGGTTGGTGTTGTTCAGTTGCTTTGACACAATCTGTTTTGTTTAAGGCGCTATATAAATAAGGGTCACTTCACTTGACTTLLLLLLLLLLLLLLLLLLLLLLLLLLLLLLLLLLLLLLLLLLLLLLLLLLLLLLLLLLLLLLLLLLLLLLLLLLLLLLLLLLLLLLLLLLLLLLLLLLLLLLLLLLLLLLLLLLLLLLLLLLLLLLLLLLLLLLLLLLLLLLLLLLLLLLLLLLLLLLLLLLLLLLLLLLLLLLLLLLLLLLLLLLLLLLLLLLLLLLLLLLLLLLLLLLLLLLLLLLLLLL                                               

Putative SNPs: 652C>T, 771A>G

35.
                                                                                                                                                100                                                                                                 200                                                                                                 300                                                                                                 400                                                                                                 500                                                                                                 600                                                                                                 700
                                             .........+.........+.........+.........+.........+.........+.........+.........+.........+.........|.........+.........+.........+.........+.........+.........+.........+.........+.........+.........|.........+.........+.........+.........+.........+.........+.........+.........+.........+.........|.........+.........+.........+.........+.........+.........+.........+.........+.........+.........|.........+.........+.........+.........+.........+.........+.........+.........+.........+.........|.........+.........+.........+.........+.........+.........+.........+.........+.........+.........|.........+.........+.........+.........+.........+.........+.........+.........+.........+.........|......
        Cyprinus_Cluster8013.seq.Contig1     GGGGGAGCACAGACTCTCTG*CCCACAGAAAACATCTCTGAAAGAAGAAGAAGAAAAAAAAAGGCATAATCAT*GAATAAAATACTGGCATTGTGCATCGGGTTACTGATTATAACCTTACCTTTTTCATCTCAGCAGGACCAAATTACAGCCAAAACACCTTCCCCCAGTAAACCTCCTGAGACTACAAAGCCTCCTCCCAGTGCTGCAGGACTGGGTCCTCTGCCCACCGTGCTGTGCCTTCTGATCCCAGCAGCCACCCTGGGCTTCATTCACAGTAGATTCTAAACTGGCTGGAGAATGTTTAGATGACCAAGAGGAGCAAAGATAGATAGCCAGTCACATGAAGACCAAACTTTTCCAAAATTCTTTAAGATAGAAGACACAGCAAGAACAACTCAACAAGAAGATGCCACAACAAATCACATTAGTTACAGATTAACAGGCTATTATTTTTTTTTTAAATAGTAAAAACTGGGATGTA*AAGGAAAATTTCCACTGTATACTGTACCGAGGG*TCCTCCAAACCCCAACGAAACCACACCATCTGAA*CTCTTA*GTT*GTGTTTTAGCCCTGCTTTCAATTGGACTCA****TCAGTTGCAACATCTTTTTGAAAGACTGTATGAATCT*GATCACTGTAATCCACCTTCTCCGAAATATTTTTGCACTAACTGTGATGAACTATCAATTGTAATGATT
                                             ----------------------------------------------------------------------------------------------------------------------------------------------------------------------------------------------------------------------------------------------------------------------------------------------------------------------------------------------------------------------------------------------------------------------------------------------------------------------------------------------------------------------------------------------------------------------------------------------------------------------------------------------------------------------------------------------------------------------------------
     gi|109280088|gb|EC392580.1|EC392580     GGGGGAGCACAGACTCTCTG*CCCACAGAAAACATCTCTGAAAGAAGAAGAA*****AAAAAGGCATAATCAT*GAATAAAATACTGGCATTGTGCATCGGGTTACTGATTATAACCTTACCTTTTTCATCTCAGCAGGACCAAATTACAGCCAAAACACCTTCCCCCAGTAAACCTCCTGAGACTACAAAGCCTCCTCCCAGTGCTGCAGGACTGGGTCCTCTGCCCACCGTGCTGTGCCTTCTGATCCCAGCAGCCACCCTGGGCTTCATTCACAGTAGATTCTAAACTGGCTGGAGAATGTTTAGATGACCAAGAGGAGCAAAGATAGATAGCCAGTCACATGAAGACCAAACTTTTCCAAAATTCTTTAAGATAGAAGACACA***AGAACAACTCAACAAGAAGATGCCACAACAAATCAGGTT**TT******TAA*********ATTTTTTT****AATAGTAAAAACTGGAATGTA*AAGGAAAATTTCCACTGTATACGNTAACGGGGGGTCCTCCAAACCCCAACGAAACCACACCATCTGAA*CTCTTA*GTTTGTGTTTTAGCCCTGCTTTCAATTGGACTCA****TCAGTTGCAACATCTTTT*GAAAGACTGTATGAATCT*GATCACTGTAATCCACCTTCTCCGAAATATTTTTGCACTAACTGTGATGAACTALL             
      gi|22022048|gb|AU279316.1|AU279316                GACTCTCTG*CCC*CAGAAAACATCTCTGAAAGAAGAAGAAGAAAAAAAAAGGCATAATCATNGAATAAAATACTGGCATTGTGCATCGGGTTACTGATTATAACCTTACCTTTTTCATCTCAGCAGGGCCAAACTTCAGCAACATCACCTACCCCCAGTAAAACTGCTGCGACTACAAAGCCTCCTCCCAGTGCTGCAGGACTGGGTCCTCTGCCCACCGTGCTGTGCCTTCTGATCCCAGCAGCCACCCTGGGCTTCATTCACAGTAGATTCTAAACTGGCTGGAGAATGTTTAGATGACCAAGAGGAGCAAAGATAGATAGCCAGTCACATGAAGACCAAACTTTTCCAAAATTCTTTAAGATAGAAGACACA***AGAACAACTCAACAAGAAGATGCCACAACAAATCAGGTT**TT*****TTAA*************TTTTTTTAA*TAGTAAAAACTGGGATGTA*AAGGAAAATTTCCACTGTATACTGTACCGAGGG*TCCTCCAAACCCCAACGAAACCACACCATCAGA**CTCTTA*GTT*GTGTTTTAGCCCTGCTTTCAATTGGACTC*****TCAGTTGCAACATCTTTTTGAAAGACTGTATGAATCTTGATCACTGTAATCCACCTTCTCCGAAATATTTTTGC*CTAACTGTGATGAACTALLLLLLLL       
     gi|109278116|gb|EC391556.1|EC391556     GGGGGAGCACAGACTCTCTGGCCCACAGCAAACATCACTG***GAAGAAGAAGAA*******GGCATCATCAT*GAATAAAATACTCGCATTGTGCCTTGGGTTACTGATTATAACCTTACCCTTTTCATCTCAG**GGAG*AGACTAAA*CCTAA*CAAC*******ACTGA***TGCTGGTACT*CAAAAAGGGC**CCAGTTCTGGAGGATTGGGTCCGCTGCCCACCGCGCTGTGCCTGCTGATCCCAGCAGTCACCCTGGGCTTCATCCACAGTAGATCCTAAACTGGCTGGAGAATGTTTAGATGACCAAGAGGAGCAAAGA************CAC**GAAGAGCAAACTTTTCCAAAATTCTTGAAGATAGAAGACACAGCAAGAACAACTCAACAAGGAGGTGCCACAACAACTCACATTAGTTACAGATTAACAGGCTATTATTTTTTTTTTAAATAATAAAAACTGGGATTTTGAAGGAA**TTGCCACTGTATACTGTACCGAGGG*TCCTCCAAACCCCAACAAAACCACACCATGAGTCTCTTTTTTGTT*GTGTTTTAGTCTTGCTTTAAATTGAACTTAGAAATCAGTCGCAACATCTTGT*GAAAGACTGTATGAATCT*GATCATTGTAATCCATGTCCTCCAAAATATTTTTGTACTAATTGTGATGAACTATCAATTGTAATGATT
      gi|50737685|gb|CA964558.2|CA964558                                                                               LLLLLLLLLLLLLLLLLLLLLLLLLLLLLLLLLLLLLLLLLLLLLLLLLLLLLLLLLLLLLLLLLLLLLLLLLLLLLLLLLLLLLLLLLLLLLLLLLLLLLLLLLLLLLLLLLLLLLLLLLLLLLCCAGTGCTGTAGGATTGGGTCCTGTGCCTACCACACTGTGCCTGCTGATCCCTGCAGCCACCCTGGGCTTCATCCACAGTAGATCCTAAACTGLLLLLLLLLLLLLLLLLLLLLLLLLLLLLLLLLLLLLLLLLLLLLLLLLLLLLLLLLLLLLLLLLLLLLLLLLLLLLLLLLLLLLLLLLLLLLLLLLLLLLLLLLLLLLLLLLLLLLLLLLLLLLLLLLLLLLLLLLLLLLLLLLLLLLLLLLLLLLLLLLLLLLLLLLLLLLLLLLLLLLLLLLLLLLLLLLLLLLLLLLLLLLLLLLLLLLLLLLLLLLLLLLLLLLLLLLLLLLLLLLLLLLLLLLLLLLLLLLLLLLLLLLLLLLLLLLLLLLLLLLLLLLLLLLLLLLLLLLLLLLLLLLLLLLLLLLLLLLLLLLLLLLLLLLLLLLLLLLLLLLLLLLLLLLLLLLLLLLLLLLLLLLLLLLLLLLLLLLLLLLLLLLLLLLLLLLLLLLLLLLLLLLLLLLLLLLL

Putative SNPs: 214C>T, 233T>C, 243T>G, 273T>C, 284T>C

36.
                                                                                                                                                100                                                                                                 200                                                                                                 300                                                                                                 400                                                                                                 500                                                                                                 600                                                                                                 700                                                                                                 800                                                                                                 900                                                                                                 1000                                                                                                1100
                                             .........+.........+.........+.........+.........+.........+.........+.........+.........+.........|.........+.........+.........+.........+.........+.........+.........+.........+.........+.........|.........+.........+.........+.........+.........+.........+.........+.........+.........+.........|.........+.........+.........+.........+.........+.........+.........+.........+.........+.........|.........+.........+.........+.........+.........+.........+.........+.........+.........+.........|.........+.........+.........+.........+.........+.........+.........+.........+.........+.........|.........+.........+.........+.........+.........+.........+.........+.........+.........+.........|.........+.........+.........+.........+.........+.........+.........+.........+.........+.........|.........+.........+.........+.........+.........+.........+.........+.........+.........+.........|.........+.........+.........+.........+.........+.........+.........+.........+.........+.........|.........+.........+.........+.........+.........+.........+.........+.........+.........+.........|.........+.........+.........+.........+.........+.........+.........+.........+.........+.........
        Cyprinus_Cluster8017.seq.Contig1     CGGGTGGAGCTCTTCAGAATTGGAGGGAAGTCACCTGACACTAACTACCTGTTTATGGGTGACTATGTAGACAGAGGATATTACTCGGTGGAGACAGTCTCACTTCTTGTTGCACTAAAGGTTCGCTATCCAGAACGCATCACGATATTGCGGGGAAACCACGAGAGCAGACAGATCACACAGGTTTATGGCTTCTATGACGAGTGCTTGAGGAAATATGGCAACGCAAATGTCTGGAAATATTTCACAGACCTCTTTGACTACCTACCCCTCACAGCTCTAGTGGATGGGCAGATCTTCTGTCTGCACGGTGGCCTCTCTCCATCCATAGACACGCTGGATCACATTCGTGCGCTGGATCGTCTGCAGGAGGTGCCACATGAGGGACCCATGTGTGACCTGCTGTGGTCAGACCCTGATGATCGCGGTGGCTGGGGAATCTCTCCACGTGGAGCTGGTTACACGTTTGGACAGGACATTTCTGAGACCTTCAACCATGCTAATGGCCTGACGCTGGTGTCTCGCGCTCATCAGCTGGTCATGGAGGGATACAACTGGTGTCATGATAGGAACGTTGTCACTATCTTCAGTGCGCCAAACTACTGCTATCGCTGTGGAAACCAGGCAGCCATTATGGAACTGGATGATACTCTTAAATATTCGTTCCTTCAGTTTGATCCAGCTCCTCGACGCGGAGAACCTCACGTCACCCGCCGCACCCCCGACTACTTCCTATAAGTGAGCACTGGCCTGCCACGAAAGAGCTCTGAAGCAAGCAGAAAATGAC***AAATCCAAACGTCTATACATCTGTTCATCCAATGTGTATATAAAATGGGAGAAATGTTCTGACACAACAACACTAACACGGACCAAAATGTGCCATTCAAGCATTTAATGCCCAAATCCAATCGCTCTGTCTCAGTACTGCTACAAAGTGTCTCATTTAAGCCTATAGTGCAAATTGCCTGCTGTATACAATAAATAGAGATGTTCCCTTCGTTCTGCAATTGTAAATTACTCTAAAGTACAAAAAATAAAAAATTGTTAGTTACTAGCTTTCTCTCTCACAGTATCACTGGATAAAAAAAATCCTTTAAGTTAGCAATGCCAGGCATGTGAAAAATGGTAACATTTTATACAAGTGCACAAGCTGACATCCTTTCCTGTATCTTCACCAGAATAAAAAATCCTATTGG
                                             -----------------------------------------------------------------------------------------------------------------------------------------------------------------------------------------------------------------------------------------------------------------------------------------------------------------------------------------------------------------------------------------------------------------------------------------------------------------------------------------------------------------------------------------------------------------------------------------------------------------------------------------------------------------------------------------------------------------------------------------------------------------------------------------------------------------------------------------------------------------------------------------------------------------------------------------------------------------------------------------------------------------------------------------------------------------------------------------------------------------------------------------------------------------------------------------------------------------------------------------------
     gi|109284129|gb|EC394670.1|EC394670     CGGGTGGAGCTCTTCAGAATTGGAGGGAAGTCACCTGACACTAACTACCTGTTTATGGGTGACTATGTAGACAGAGGATATTACTCGGTGGAGACAGTCTCACTTCTTGTTGCACTAAAGGTTCGCTATCCAGAACGCATCACGATATTGCGGGGAAACCACGAGAGCAGACAGATCACACAGGTTTATGGCTTCTATGACGAGTGCTTGAGGAAATATGGCAACGCAAATGTCTGGAAATATTTCACAGACCTCTTTGACTACCTACCCCTCACAGCTCTAGTGGATGGGCAGATCTTCTGTCTGCACGGTGGCCTCTCTCCATCCATAGACACGCTGGATCACATTCGTGCGCTGGATCGTCTGCAGGAGGTGCCACATGAGGGACCCATGTGTGACCTGCTGTGGTCAGACCCTGATGATCGCGGTGGCTGGGGAATCTCTCCACGTGGAGCTGGTTACACGTTTGGACAGGACATTTCTGAGACCTTCAACCACGCTAACGGCCTCACGCTGGTGTCTCGCGCTCATCAGCTAGTCATGGAGGGATACAACTGGTGTCATGATAGGAACGTTGTCACTATCTTCAGTGCGCCAAACTACTGCTATCGCTGTGGAAATCAGGCAGCCATTATGGAACTGGACGATACTCTTAAATATTCATTCCTTCAGTTTGATCCAGCTCCTCGACGTGGAGAACCTCACGTCACCCGC*GCACCCCCGACTACTTC                                                                                                                                                                                                                                                                                                                                                                                                                                                                                   
     gi|109284030|gb|EC394616.1|EC394616                                                                                                                                                                                                                                                                                                                                                                                                            LLLGTGATCTGCTGTGGTCAGACCCTGATGATCGTGGTGGCTGGGGAATCTCTCCACGTGGAGCTGGTTACACGTTTGGACAGGACATTTCTGAGACCTTCAACCATGCTAATGGCCTGACGCTGGTGTCTCGCGCTCATCAGCTGGTCATGGAGGGATACAACTGGTGTCATGATAGGAACGTTGTCACTATCTTCAGTGCGCCAAACTACTGCTATCGCTGTGGAAACCAGGCAGCCATTATGGAACTGGATGATACTCTTAAATATTCGTTCCTTCAGTTTGATCCAGCTCCTCGACGCGGAGAACCTCACGTCACCCGCCGCACCCCCGACTACTTCCTATAAGTGAGCACTGGCCTGCCACGAAAGAGCTCTGAAGCAAGCAGAAAATGAC***AAATCCAAACGTCTATACATCTGTTCATCCAATGTGTATATAAAATGGGAGAAATGTTCTGACACAACAACACTAACACGGACCAAAATGTGCCATTCAAGCATTTAATGCCCAAATCCAATCGCTCTGTCTCAGTACTGCTACAAAGTGTCTCATTTAAGCCTATAGTGCAAATTGCCTGCTGTATACAATAAATAGAGATGTTCCCTTCGTTCTGNCATTGTAAATTACTCTAAAGTACAAAAAATAAAAAATTGTTAGTTACTAGCTTTCTCTCTCACAGTATCACTGGATAAAAAA**TCCTTTAAGTT                                                                                                
      gi|50741155|gb|CF662264.2|CF662264                                                                                                                                                                                                                                                                                                                                                                                                                                                         LLATCTCTCC*CGTGGAGCTGGTTAC*CGTTTGGACAGGACATTTCTGAGACCTTCAACCATGCTAATGGCCTGACGCTGGTGTCTCGCGCTCATCAGCTGGTCATGGAGGGATACAACTGGTGTCATGATAGGAACGTTGTCACTATCTTCAGTGCGCCAAACTACTGCTATCGCTGTGGAAACCAGGCAGCCATTATGGAACTGGATGATACTCTTAAATATTCGTTCCTTCAGTTTGATCCAGCTCCTCGACGCGGAGAACCTCACGTCACCCGCCGCACCCCCGACTACTTCCTATAAGTGAGCACTGGCCTGCCACGAAAGAGCTCTGAAGCAAGTAGAAAATGAC***AAATCCAAACGTCTATACATCTGTTCATCCAATGTGTATATAAAATGGGAGAAATGTTCTGACACAACAACACTAACACGGACCAAAATGTGCCATTCAAGCATTTAATGCCCAAATCCAATCGCTCTGTCTCAGTACTGCTACAAAGTGTCTCATTTAAGCCTATAGTGCAAATTGCCTGCTGTATACAATAAATAGAGATGTTCCCTTCGTTCTGCAATTGTAAATTACTCTAAAGTACAACAAA*AAAAAATTGTTAGTTACTAGCTTTCTCTCTCACAGTATCACTGGATAAAAAAAATCCTTTAAGTTAGCAATGCCAGGCATGTGAAAAATGGTAACATTTTATACAAGTGCACAAGCTGACATCCTTTCCTGTATCTTCACCAGAATAAAAAATCCTATTGG
     gi|109278099|gb|EC391548.1|EC391548                                                                                                                                                                                                                                                                                                                                                                                                                                                                                                                                                                                                                                                                     LGGACGATACTCTTAAATATTCATTCCTTCAGTTTGATCCAGCTCCTCGACGTGGAGAACCTCACGTCACCCGCCGCACCCCCGACTACTTCCTGTAAGCAAGCACTGGCCTGCCACGAATGAGCTCTGAAGCAAGCGGAAAATGATGAAAAATCCAAACGTCTATACATCTGTTCACCCACTGTGTATATAAAATGGGGGAAATATT**GACACAACAACACTAACACGGACCAAAATGTGCCATACAAGCATTAAATGCCCAAATCTGATCGCTCTGTCTCAGTACTGCTACAAAGTGTCTCGTTTTAGCCTATAGTGCAAATTGCCTGCTGTATACAATGAATAGAGATGTTCCCTTTGTTCTTCGATTGTAAATTACTCTLLLLL                                                                                                                                                                          

Putative SNPs: 645C>T, 663A>G, 693T>C

37.
                                                                                                                                                100                                                                                                 200                                                                                                 300                                                                                                 400                                                                                                 500                                                                                                 600                                                                                                 700                                                                                                 800                                                                                                 900                                                                                                 1000                                                                                                1100
                                             .........+.........+.........+.........+.........+.........+.........+.........+.........+.........|.........+.........+.........+.........+.........+.........+.........+.........+.........+.........|.........+.........+.........+.........+.........+.........+.........+.........+.........+.........|.........+.........+.........+.........+.........+.........+.........+.........+.........+.........|.........+.........+.........+.........+.........+.........+.........+.........+.........+.........|.........+.........+.........+.........+.........+.........+.........+.........+.........+.........|.........+.........+.........+.........+.........+.........+.........+.........+.........+.........|.........+.........+.........+.........+.........+.........+.........+.........+.........+.........|.........+.........+.........+.........+.........+.........+.........+.........+.........+.........|.........+.........+.........+.........+.........+.........+.........+.........+.........+.........|.........+.........+.........+.........+.........+.........+.........+.........+.........+.........|.........+.........+.........+.........+.
        Cyprinus_Cluster8021.seq.Contig1     GGGGAAGAAGAAAAAGAAAAAAGAAGACGGTTCAAAGGGAAATGCGTGTGTTTCTTTTTTTATTTTAATTTCTAATTTTATTTATTTAATTTTTTATGGCGATAGTGGAATGGCGATTTTGTTCTTTTTTATTTTTGGTTTTATCCCACCATGGTTTTGTCGGTGTTGATATTGTCGGAGAATCAGTGTTGGAGGGAGATTCAGTCACTCTAAACACTTATGTTGAAACAAACCAACAAGAAGATATAAAATGGTATTTTAATGACATTAGAATAGCTGAAATCAGTGGAGATCTCAGTGATATCTGTACAGATGTTCAGTGTAATGAAGGTACTGAGAGATTCAGAGACAGACTGAAGCTGGACAATCAGACTGGATCTCTGACCATCACAAACACCAGAACCACAGACTCTGGACTTTATGAATTAAAGATCATCAGCAGCAACAGCATCAGTGAAAAGACCTT*CAATGTTACTGTTTATGGTGTTTCTGCTTCTGAACAAGATGAA*AAGTCAGTGAAGGAGGGAGAATCTGTCACTTTAGATCCTGGTGTAGTAAGACAAC*CAAATGAGGTGATGAGATGGTATTATAAAGACACTCTCATCGCT*GAAATCACT*CAATATCTGAGTAACGTCTGTACAGAT*GATGAGTG*TAAAGAGAGATTCAGAGACAGACTGCAGCTGGATCATCAGACTGGATCTCTGACCATCAGGCACATCAGAATCACAGACTCTGGACTTTATGAACTAAAGATCAGCAGCAGCAGTCGCCGCCGCCGCCGCAGCATCAGCAGTGTAAAGAGCTTCGATGTTACTGTCATTAATTCAGGTCTGTCTCTGGGTGCTGTAGCAGGTCTGTCTGTTATTGTTCTTCTACTGGTGACTGCAGCTGTAGCTGTTGGTGTGATTTTTTATCACGGCAAGAGATCCATAAACGGTCACGAGATTGTGCAGTCCGAACAGGATTAGTGGGTAACATGATTTCTACTGAAGCATTATTCACATTGATCCATCGTTTCCCAAAAATACTGTACCTAATGATCATCAAGGGGCCATTCACACAGAAACGGGTTTTTCCATTCCACCTCGGTACTTTTCCGATTGTTTTTTCTGTGTAATCACATGCTAGAAAAAC
                                             -------------------------------------------------------------------------------------------------------------------------------------------------------------------------------------------------------------------------------------------------------------------------------------------------------------------------------------------------------------------------------------------------------------------------------------------------------------------------------------------------------------------------------------------------------------------------------------------------------------------------------------------------------------------------------------------------------------------------------------------------------------------------------------------------------------------------------------------------------------------------------------------------------------------------------------------------------------------------------------------------------------------------------------------------------------------------------------------------------------------------------------------------------------------------------------
     gi|109280247|gb|EC392664.1|EC392664     GGGGAAGAAGAAAAAGAAAAAAGAAGACGGTTCAAAGGGAAATGCGTGTGTTTCTTTTTTTATTTTAATTTCTAATTTTATTTATTTAATTTTTTATGGCGATAGTGGAATGGCGATTTTGTTCTTTTTTATTTTTGGTTTTATCCCACCATGGTTTTGTCGGTGTTGATATTGTCGGAGAATCAGTGTTGGAGGGAGATTCAGTCACTCTAAACACTTATGTTGAAACAAACCAACAAGAAGATATAAAATGGTATTTTAATGACATTAGAATAGCTGAAATCAGTGGAGATCTCAGTGATATCTGTACAGATGTTCAGTGTAATGAAGGTACTGAGAGATTCAGAGACAGACTGAAGCTGGACAATCAGACTGGATCTCTGACCATCACAAACACCAGAACCACAGACTCTGGACTTTATGAATTAAAGATCATCAGCAGCAACAGCATCAGTGAAAAGACCTT*CAATGTTACTGTTTATGGTGTTTCTGCTTCTGAACAAGATGAA*AAGTCAGTGAAGGAGGGAGAATCTGTCACTTTAGATCCTGGTGTAGTAAGACAAC*CAAATGAGGTGATGAGATGGTATTATAAAGACACTCTCATCGCT*GAAATCACT*CAATATCTGAGTAACGTCTGTACAGAT*GATGAGTG*TAAAGAGAGATTCAGAGACAGAC                                                                                                                                                                                                                                                                                                                                                                                                                                                                           
     gi|109280708|gb|EC392898.1|EC392898     GGGGAAGAAGAAAAAGAAAAAAGAAGACGGTTCAAAGGGAAATGCGTGTGTTTCTTTTTTTATTTTAATTTCTAATTTTATTTATTTAATTTTTTATGGCGATAGTGGAATGGCGATTTTGTTCTTTTTTATTTTTGGTTTTATCCCACCATGGTTTTGTCGGTGTTGATATTGTCGGAGAATCAGTGTTGGAGGGAGATTCAGTCACTCTAAACACTTATGTTGAAACAAACCAACAAGAAGATATAAAATGGTATTTTAATGACATTAGAATAGCTGAAATCAGTGGAGATCTCAGTGATATCTGTACAGACGTTCAGTGTAATGAAGGTACTGAGAGATTCAGAGACAGACTGAAGCTGGACAATCAGACTGGATCTCTGACCATCACAAACACCAGAACCACAGACTCTGGACTTTATGAATTAAAGATCATCAGCAGCAACAGCATCAGTGAAAAGACCTT*CAATGTTACTGTTTATGGTGTTTCTGCTTCTGAACAAGATGAA*AAGTCAGTGAAGGAGGGAGAATCTGTCACTTTAGATCCTGGTGTAGTAAGACAAC*CAAATGAGGTGATGAGATGGTATTATAAAGACACTCTCATCGCT*GANATCACT*CAATATCTGAGTAACGTCTGTACAGAT*GATGAGTG*TAAAGAGAGATTCAGAGACAGAC                                                                                                                                                                                                                                                                                                                                                                                                                                                                           
      gi|50741363|gb|CF662462.2|CF662462                                                                                                                      LLLLLLLLLLLLLLLLLLLLLLLLLLLLLLLLLLLLLLLLLLLLLLLLLLLLLLLLLLLLLLLLLLLLLTCAGTGATGGTGGGAGATTCAGTCGCTCTACACACTGATGTTAAAACAAACCAGATAGAAAAGATTAAATGGTTTTTTAATGACATTCGCATAGCGCAAATCAGTGACTATCTCAGTAAGACCTGTACAGATGTTCAGTGTAATGAAGGTACTGAGAGATTCAGAGACAGACTGAAGCTGGACAATCAGACTGGATCTCTGACTATCATGAACATCAACACCACAGACTCTGGAGATTATAAATTACAGATCATCAAAACCAACAGCATGAGCGAAAATATCTTTCGA*GTCACTGTCCG*GGAGA**CGGAT****AAAATGAAGACCAAGACAGTGAAGGAGGGACAATCTGTCACTTTAGATCCTGGTGTAATAAAA*AACACAAATTATTTGATGAAGTGGTATTTTAACGATACTCTCATCGCTAGAGATACCAGCCAGATCTC**TACAGA*TGTTGAGTTTGAAGA*TGCTGGCGGGAGATTCAGAGACAGACTGAAGCTGGATCATCAGACTGGATCTCTGACCATCACAAACACCAGAACCACAGACTCTGGAGATTATCATCTTGAGATCALLLLLLLLLLLLLLLLLLLLLLLLLLLLLLLLLLLLLLLLLLLLLLLLLLLLLLLLLLLLL                                                                                                                                                                                                                                                                                                                             
     gi|109283296|gb|EC394226.1|EC394226                                                                                                                                                                                                                                                                                                                                                                                                                LLLLLLLLLLLLLLLLLLLLLLLLLLLLLLLLLLLLLLLLLLLLLLLLLLLLLLLLLLLLLLLLLLLLLLLLLLLLLLLLLLLLLLLLLLLLLLLLLLLLLLLLLLLLLLLLLLA*AAGTCAGTGAAGGAGGGAGAATCTGTCACTTTAGATCCTGGAGTAATAAAACAAC*CAAATCATGTGATGATGTGGTATTTTAATGACACTCTCATCGCT*GAAATCACT*GGAGATCCCAACAAGGCCTGCACAGAC*TTTCATTG*TCCCGAGAGATTTAGAGACAGACTGCAGCTGGATCATCAGACTGGATCTCTGACCATCAGGCACATCAGAATCACAGACTCTGGACTTTATGAACTAAAGATCAGCAGCAGCAGTCGCCGCCGCCGCCGCAGCATCAGCAGTGTAAAGAGCTTCGATGTTACTGTCATTAATTCAGGTCTGTCTCTGGGTGCTGTAGCAGGTCTGTCTGTTATTGTTCTTCTACTGGTGACTGCAGCTGTAGCTGTTGGTGTGATTTTTTATCACGGCAAGAGATCCATAAACGGTCACGAGATTGTGCAGTCCGAACAGGATTAGTGGGTAACATGATTTCTACTGAAGCATTATTCACATTGATCCATCGTTTCCCAAAAATACTGTACCTAATGATCATCAAGGGGCCATTCACACAGAAACGGGTTTTTCCATTCCACCTCGGTACTTTTCCGATTGTTTTTTCTGTGTAATCACATGCTAGAAAAAC

Putative SNPs: 557G>A, 561G>A, 575G>T, 584A>G, 592A>T, 626T>G, 631G>C, 663A>C

38.
                                                                                                                                                100                                                                                                 200                                                                                                 300                                                                                                 400                                                                                                 500                                                                                                 600                                                                                                 700
                                             .........+.........+.........+.........+.........+.........+.........+.........+.........+.........|.........+.........+.........+.........+.........+.........+.........+.........+.........+.........|.........+.........+.........+.........+.........+.........+.........+.........+.........+.........|.........+.........+.........+.........+.........+.........+.........+.........+.........+.........|.........+.........+.........+.........+.........+.........+.........+.........+.........+.........|.........+.........+.........+.........+.........+.........+.........+.........+.........+.........|.........+.........+.........+.........+.........+.........+.........+.........+.........+.........|.........+.........+.........+.........+.........+.........+.........+.........+.........+......
        Cyprinus_Cluster8025.seq.Contig1     CGGGGCAGTGCTTTTGACCTACACCGTCGCAGGAGAAAATGGCAGCGCTTGGAGTGGGGCTGCGGGTGCGTCAGTTTAGCACCTCTGTGATCCGACCAGCAGCAAAACTCGTCAAGCCCCCTATCCAGGTCTATGGGGTGGAGGGACGTTATGCTACTGCCCTGTTCTCTGCTGCCAGCAAGCAGAAGAACCTCGATAAGGTCGAACAGGAACTTGTCCGTGTGTCTAGCCTGATTAAGGATCCTAAGCTGTCAAGTATTGTGATGAATCCTCATATCAAGCGCAGTCTCAAACAGAAGACTTTCATTGATGCTTTGACTAAGGCGAAACTCTCCCCCATCACCATCAACCTCATCAATGTCCTAGCAGAAAATGGCCGCTTGACCTTGACCCCTGATGTCATCACAGCCTTTGGCAAAATGATGAGTGCCCACAGAGGAGAGGTCACATGCTCAGTCACCACCGCTCAGCCTCTGGATGAAGCTAATCTTGCAGAGCTGAAGGTGGCACTGAATGGTTTCCTGACAAAGGGAGAGACCATCAAACTTGAGACCAAGTCTGATCCCTCTATCCTTGGGGGCATGATCGTGAGCATTGGTGATAAGTATGCGGACATGTCTACCAAGACAAAGATCCAGAAGCTCACCAAGCTGATCAGGGAGACCTAAGTCCTGTGGACTGACCAGACCTAATCAATACAAGATTCAGGGGGTGAAGAAAGAACAACCTCTCTGTGCTATTGTGTAGTTGAATTACCTTGTCCAGCTGTTCAAAATAAATATTATGTAACATTTAC
                                             ----------------------------------------------------------------------------------------------------------------------------------------------------------------------------------------------------------------------------------------------------------------------------------------------------------------------------------------------------------------------------------------------------------------------------------------------------------------------------------------------------------------------------------------------------------------------------------------------------------------------------------------------------------------------------------------------------------------------------------------------------------------------------------------------------------------------------
      gi|50743914|gb|CA967163.2|CA967163     CGGGGCAGTGCTTTTGACCTACACCGTCGCAGGAGAAAATGGCAGCGCTTGGAGTGGGGCTGCGGGTGCGTCAGTTTAGCACCTCTGTGATCCGACCAGCAGCAAAACTCGTCAAGCCCCCTATCCAGGTCTATGGGGTGGAGGGACGTTATGCTACTGCCCTGTTCTCTGCTGCCAGCAAGTAGAAGAACCTCGATAAGGTCGAACAGGAACTTGTCCGTGTGTCTAGCCTGATTAAGGATCCTAAGCTGTCAAGTATTGTGATGAATCCTCATATCAAGCGCAGTCTCAAACAGAAGACTTTCATTGATGCTTTGACTAAGGCGAAAATCTCCCCCATCACCATCAACCTCATCAATGTCCTAGCAGAAAATGGCCGCTTGACCTTGACCCCTGATGTCATCACAGCCTTTGGCAAAATGATGAGTGCCCACAGAGGAGAGGTCACATGCTCAGTCACCACCGCTCAGCCTCTGGATGAAGCTAATCTTGCAGAGCTGAAGGTGGCACTGAATGGTTTCCTGGCAAAGGGAGAGACCATCAAACTTGAGACCAAGTCTGAACCCTCTATCCTTGGGGGCATGATCGTGAGCATTGGTGATAAGTATGCGGACATGTCTACCAAGACAAAGATCCAGAAGCTCACCAAGCTGATCAGGGAGACCTAAGTCCTGTGGACTGACCAGACCTAATCAATACAAGATTCANGGGGTGAAGAAAGAACAACCTCTCTCTGCTATTGTGTAGTTGAATTACCTTGTCCAGCTGTTCAAAATAAATATTATGTAACATTTAC
       gi|4806254|gb|AU062370.1|AU062370              LLLLLLLLLLLLLLLLLLLLLLLLLLLLLLTGGCAGCGCTTGGAGTGGGGCTGCGGGTGCGTCAGTTTAGCACCTCTGTGATCCGACCAGCAGCAAAACTCGTCAAGCCCCCTATCCAGGTCTATGGGGTGGAGGGACGATATGCTACTGCCCTGTTCTCTGCTGCCAGCAAGCAGAAGAACCTCGATAAGGTCGAACAGGAACTTGTCCGCGTGTCTAGCCTGATTAAGGATCCTAAGCTGTCAAGTATTGTGATGAATCCTCATATCAAGCGCAGTCTCAAACAGAAGACTTTCATTGATGCTTTGACTAAGGCGAAACTCTCCCCCATCACCATCAACCTCATCAATGTCCTAGCAGAAAATGGCCGCTTGACCTTGACCCCTGATGTCATCACAGCCTTTGGCAAAATGATGAGTGCCCACAGAGGAGAGGTCACATGCTCAGTCACCACCGCTCAGCCTCTGGATGAAGCTAATCTTGCA                                                                                                                                                                                                                                                                                                              
      gi|50740981|gb|CA967158.2|CA967158                                         AAATGGCAGCGCTTGGAGTGGGGTCGCGGGTGCGTCAATTTAGCACCTCTGTGATCCGACCAGCAGCAAAACTTGTCAAGCCCCCTACCCAGGTCTATGGGGTGGAGGGACGTTATGCTAGTGCCCTGTTCTCTGCTGCCAGCAAGCAGAAGAACCTCGATAAGGTCGAACAGGAACTTGTCCGTGTGTCTAGCCTGATTAAGGATCCTAAGCTGTCAAGTATCGTCATGAATCCTCATATCAAGCGCAGTCTCAAACAGAAGACTTTCATTGATGCTTTGACTAAGGCGAAACTCTCCCCCATCACCATCAACCTCATCAATGTCCTAGGAGAAAATGGCCGCTTGACCTTGACCCATGATGTCATCACAGCCTTTGGCAAAATGATGAGTGCCCACAGAGGAGAGGTCACATGCTCAGTCACCACTGCTCAGCCTCTGGATGAAGCTAATCTTG                                                                                                                                                                                                                                                                                                                
      gi|50743968|gb|CF661700.2|CF661700                                                                                                                                                        GTTATGCTACTGCCCTGTTCTCTGCTGCCAGCAAGCAGAAGAACCTCGATAAGGTCGAACAGGAACTTGTCCGTGTGTCTGGCCTGATTAAGGATCCTAAGCTGTCAAGTATCGTGATGAATCCTCATATCAAGCGCAGTCTCAAACAGAAGACTTTCATTGATGCTTTGATTAAGGCGAAACTCTCCCCCATCACCATCAACCTCATCAATGTCCTAGCAGAAAATGGCCGCTTGACCTTGACCCATGATGTCATCACAGCCTTTGGCAAAATGATGAGTGCTCACAGAGGAGAGGTCACATGCTCAGTCACCACCGCTCAGCCTCTGGATGAAGCTAATCTTGCAGAGCTGAAGGTGGCACTGAATGGTTTCCTGACAAAGGGAGAGACCATCAAACTTGAGACCAAGTCTGATCCCTCTATCCTTGGGGGCATGATCGTGAGCATTGGTGATAAGTATGCGGACATGTCTACCAAGACAAAGATCCAGAAGCTCACCAAGCTGATCAGGGAGACCTAAGTCCTGTGGACTGACCAGACCTAATCAATACAAGATTCAGGGGGTGAAGAAAGAACAACCTCTCTGTGCTATTGTGTAGTTGAATTACCTTGTCCAGCTGTTCAAAATAAATATTATGTAACATLL  

Putative SNPs: 260T>C, 394C>A

39.
                                                                                                                                                100                                                                                                 200                                                                                                 300                                                                                                 400                                                                                                 500                                                                                                 600                                                                                                 700
                                             .........+.........+.........+.........+.........+.........+.........+.........+.........+.........|.........+.........+.........+.........+.........+.........+.........+.........+.........+.........|.........+.........+.........+.........+.........+.........+.........+.........+.........+.........|.........+.........+.........+.........+.........+.........+.........+.........+.........+.........|.........+.........+.........+.........+.........+.........+.........+.........+.........+.........|.........+.........+.........+.........+.........+.........+.........+.........+.........+.........|.........+.........+.........+.........+.........+.........+.........+.........+.........+.........|.........+.........+.........+.........+.........+.........+.........+.........+.
        Cyprinus_Cluster8034.seq.Contig1     GAGTGTGTGCACACAAGCAAGGAGGGCTGTGTTTGGTGGGTTTCGTCTGGAAAATGCTGTAGTAAAACCCAAATT*CGTTCAAAATGGCTGCTGCTCATCGTTTAGTGATTGTACGCCACGGCGAGAGCTCCTGGAACCAAGAGAACCGTTTCTGTGGCTGGTTTGATGCAGACCTCAGTGAAAAGGGTCTGGAGGAAGCAAAGCGAGGTGCTCAAGCCATCAAAGATGCAGGCATGAAGTTTGATGTGTGCTACACTTCCGTTTTGAAGCGCGCTATCAAGACTCTGTGGACCATCATGGAGGTCACAGACCAGATGTGGCTGCCTGTAGTGCGCACCTGGCGTCTGAATGAACGTCACTACGGTGGTCTGACTGGTCTGAACAAGGCAGAGACGGCAGCCAAGCACGGAGAGGAGCAGGTCAAGGTCTGGCGCAGATCATTTGATATTCCCCCTCCTCCTATGGATAAGGACCATCCATATCACAAGATCATCAGCGAGTCAAGACGATACAAGGGTCTGAAAGAGGGTGAGCTACCCATCTGCGAGAGCTTGAAGGATACCATCGCTCGTGCCCTGC*CATTCTGGAATGAGGTTATTGTACCTGAGATCAAGGCCGGCAAAAACGTCATAATCGCAGCTCACGGCAACAGCCTCTCGTGGAATTGTCAAGCACTTAGAGAGCATGTCAGATGCAGCCATCATGGAGCTAAACCTGCCCACAGGCATTCCCATCGTCTATGAGCTGGACAAGGACCTGAAGCCCATTAAACCCATGCA
                                             -------------------------------------------------------------------------------------------------------------------------------------------------------------------------------------------------------------------------------------------------------------------------------------------------------------------------------------------------------------------------------------------------------------------------------------------------------------------------------------------------------------------------------------------------------------------------------------------------------------------------------------------------------------------------------------------------------------------------------------------------------------------------------------------------------------
      gi|50735739|gb|CA969517.2|CA969517     GAGTGTGTGCACTCA*GCTAGGAGGGCTGTGTTTGGTGGGTTTAGTCTGGAAAATACTGTAGTGAAAACCAAATTTCTTTCAGAATGGCTGCTGCTCATCGTCTAGTGATTGTACGCCATGGTGAGAGCTCCTGGAACCAGGAGAACCGTTTCTGTGGCTGGTTTGATGCAGACCTCAGTGAAAAGGGTCTGGAGGAAGCAAAGCGTGGTGCTCAAGCCATCAAAGATGCAGGCATGAAGTTTGATGTGTGCTACACCTCCGTTCTGAAGCGTGCTATCAAGACTCTGTGGACAATCATGGAGATCACAGACCAGATGTGGCTGCCTGTAATGCGCACCTGGCGTCTGAATGAACGTCACTACGGTGGTCTGACTGGTCTGAACAAGGCAGAGACGGCAGCCAAGCACGGAGAGGAGCAGGTCAAGATCTGGCGCAGATCATTCCATATTCCCCCTCCTCCTATGGATAAGGACCATCCATACAACAAGATCATCAGTGAGTCAAGACGATATAAGGGTCTGATAGAAGGTGAGCTTCCCATCTGCGAGAGCTTGAAGGACACCATCGCTCGTGCCCTGC*CL                                                                                                                                                                                                      
      gi|50742286|gb|CF660428.2|CF660428         GTGTGCACACAAGCAAGGAGGGCTGTGTTTGGTGGGTTTCGTCTGGAAAATGCTGTAGTAAAACCCAAATT*CGTTCAAAATGGCTGCTGCTCATCGTTTAGTGATTGTACGCCACGGCGAGAGCTCCTGGAACCAAGAGAACCGTTTCTGTGGCTGGTTTGATGCAGACCTCAGTGAAAAGGGTCTGGAGGAAGCAAAGCGAGGTGCTCAAGCCATCAAAGATGCAGGCATGAAGTTTGATGTGTGCTACACTTCCGTTTTGAAGCGCGCTATCAAGACTCTGTGGACCATCATGGAGGTCACAGACCAGATGTGGCTGCCTGTAGTGCGCACCTGGCGTCTGAATGAACGTCACTACGGTGGTCTGACTGGTCTGAACAAGGCAGAGACGGCAGCCAAGCACGGAGAGGAGCAGGTCAAGGTCTGGCGCAGATCATTTGATATTCCCCCTCCTCCTATGGATAAGGACCATCCATATCACAAGATCATCAGCGAGTCAAGACGATACAAGGGTCTGAAAGAGGGTGAGCTACCCATCTGCGAGAGCTTGAAGGATACCATCGCTCGTGCCCTGCTCATTCTGGAATGAGGTTATTGTACCTGAGATCAAGGCCGGCAAAAACGTCATAATCGCAGCTCACGGCAACAGCCTCCGNTGGAATTGTCAAGCACTTAGAGAGCATGTCAGATACAGCCATCATGGAGCTAAACCTGCCCACAGGCATTCCCATCGTCTATGAGCTGGACAAGGACCTGAAGCCCATTAAACCCATGCA
      gi|50740768|gb|CA966973.2|CA966973         GTGTGCACACAAGCTCGGAGGGCTGTGTTTGGTGGGTTTCCTCTGGAAAATACTGTAGTAAAACCCAAATT*CGTTCAAAATGGCTGCTGCTCATCGTTTAGTGATTGTACGCCACGGCGAGAGCTCCTGGAACCAAGAGAACCGTTTCTGTGGCTGGTTTGATGCAGACCTCAGTGAAAAAGGTCTGGAGGAAGCAAAGCGAGGTGCTCAAGCCATCAAAGATGCAGGCATGAAGTTTGATGTGTGCTACACTTCCGTTTTG                                                                                                                                                                                                                                                                                                                                                                                                                                                                                                                                  
      gi|50742442|gb|CF660542.2|CF660542           GTGCACACAAGCAAGGAGGGCTGTGTTTGGTGGGTTTCGTCTGGAAAATGCTGTAGTAAAACCCAAATT*CGTTCAAAATGGCTGCTGCTCATCGTTTAGTGATTGTACGCCACGGCGAGAGCTCCTGGAACCAAGAGAACCGTTTCTGTGGCTGGTTTGATGCAGACCTCAGTGAAAAGGGTCTGGAGGAAGCAAAGCGAGGTGCTCAAGCCATCAAAGATGCAGGCATGAAGTTTGATGTGTGCTACACTTCCGTTTTGAAGCGCGCTATCAAGACTCTGTGGACCATCATGGAGGTCACAGACCAGATGTGGCTGCCTGTAGTGCGCACCTGGCGTCTGAATGAACGTCACTACGGTGGTCTGACTGGTCTGAACAAGGCAGAGACGGCAGCCAAGCACGGAGAGGAGCAGGTCAAGGTCTGGCGCAGATCATTTGATATTCCCCCTCCTCCTATGGATAAGGACCATCCATATCACAAGATCATCAGCGAGTCAAGACGATACAAGGGTCTGAAAGAGGGTGAGCTACCCATCTGCGAGAGCTTGAAGGATACCATCGCTCGTGCCCTGC*CATTCTGGAATGAGGTTATTGTACCTGAGATCAAGGCCGGCAAAAACGTCATAATCGCAGCTCACGGCAACAGCCTCTCGTGGAATTGTCAAGCACTTAGAGAGCATGTCAGATGCAGCCATCATGGAGCTAAACCTGCCCACAGGCATTCCCATCGTCTATGAGCTGGACAAGGACCTGAAGCCCATTAA*CCCATGC 
      gi|50740970|gb|CA967134.2|CA967134                                                                                                                                     CTCCTGGAACCAACAGAACCGTTTCTGTGGCTGGTTTGATGCAGACCTCAGTGAAAAGGGTCTGGAGGAAGCAAAGCGAGGTGCTCAAGCCATCAAAGATGCAGGCATGAAGTTTGATGTGTGCTACACTTCCGTTTTGAAGCGCGCTATCAAGACTCTGTGGACCATCATGGAGGTCACAGACCAGATGTGGCTGCCTGTAGTGCGCACCTGGCGTCTGAATGAACGTCACTACAGTGGTCTGACTGGTCTGAACAAGGCAGAGACGGCAGCCAAGCACGGAGAGGAGCAAGTCGAGGTCTGGCGCACATCATTTGATATTCCCCCTCCTCCTATGGATAAGGACCATCCATATCACAAGATCATCATCGAGTCAAGACGATACAAGGGTCTGAAAGAGGGTGAGCTACCCATCTGCGAGAGCTTGAAGGATACCATCTCTCGTGCCCTGC*CATTCTGGAAT                                                                                                                                                                                             

Putative SNPs: 19T>A, 56A>G

40.

                                                                                                                                                100                                                                                                 200                                                                                                 300                                                                                                 400                                                                                                 500                                                                                                 600                                                                                                 700                                                                                                 800                                                                                                 900                                                                                                 1000
                                             .........+.........+.........+.........+.........+.........+.........+.........+.........+.........|.........+.........+.........+.........+.........+.........+.........+.........+.........+.........|.........+.........+.........+.........+.........+.........+.........+.........+.........+.........|.........+.........+.........+.........+.........+.........+.........+.........+.........+.........|.........+.........+.........+.........+.........+.........+.........+.........+.........+.........|.........+.........+.........+.........+.........+.........+.........+.........+.........+.........|.........+.........+.........+.........+.........+.........+.........+.........+.........+.........|.........+.........+.........+.........+.........+.........+.........+.........+.........+.........|.........+.........+.........+.........+.........+.........+.........+.........+.........+.........|.........+.........+.........+.........+.........+.........+.........+.........+.........+.........|.........+.........+.........+.........+.........+.........+.........+....
        Cyprinus_Cluster8041.seq.Contig1     ATTTGTGAAGCTTGATTGCTCTGAATCTGGTGCTGATGATGGAGAGCGTGCAGCAGACGATCACGAGGGTCTCTCAGGAGCTGAACTGCAGTCCCACGTCCCTCAGGGTGGCAGAACATCTGGACCGACACGATGAGCTGCGACTGCTGCGCCAGGAGTTCCTCATACCTAAAATATCTGACCTGCCACCGTCGGATTTGTCACTTGTGGATGGTTCTGAAGATTGTATTTATTTCGCTGGGAATTCACTGGGTCTCCAGCCGAAAAACACCAAAAAATACATCGAAGAGGAGCTGGAGAAATGGGCCACAATTGGTGTCCATGGCCACCTGAAGGGGTCGCGACCTTGGGCCTGGGC*TGAGGATACCCTGGAGGAGCTGATGGCAAAAGATCGTTGGTGCTAAACCTGAGGAAGTGGTTTTGATGAATGGATTGACAGTCAATCTGCATCTTCTGATGCTTTCCTTCTACAAACCGTCTCCAAAACGCTATAAGATTCTTCTAGAAGACAAGGCCTTTCCATCAGACCACTACGCCATTGAATCTCAGATCCGGCTGAGAGGACTGGACG*TGACCGACAGCATGCTGATCATTAAACCAAGACAGGGTGAAGACACCATCAGGACAGAGGATATCGTGTCGGTCATCGAGCGGGAGGGCGACGCCATCGCTCTGGTCATGCTCAGCGGCGTTCAGTATTACACCGGTCAGCTCTTCAACATGGAGGCCATTACCAGTGCAGGACACGCCAAGGGGTGTTTGGTA*GGGTTTTGAATTGTGCACACGCCCGTAGGAAACGCTGAACTGCAACTTCACGACTGGAAATGTGGAATTTTGGCGTGGCTGGTGCTCTTATAAAGTATGTGAACTCAGGGGGCCCGGTGGTTTCTGGCTTGGGAGCTTATATTACATGAAGAAACACGCCTCACAGCCGTCCAGCCCACTCTGATGGGGCCTGGGTGGGGGACACCAACCTGAAGAACCAGAATTCTTCATTGAACCACGAAAATGGAGCTTTCCGCCCTGGGTGGTTAAAAGGAATTCCGTCTGGTCCAACCAGCCTGTTTTTAT
                                             ------------------------------------------------------------------------------------------------------------------------------------------------------------------------------------------------------------------------------------------------------------------------------------------------------------------------------------------------------------------------------------------------------------------------------------------------------------------------------------------------------------------------------------------------------------------------------------------------------------------------------------------------------------------------------------------------------------------------------------------------------------------------------------------------------------------------------------------------------------------------------------------------------------------------------------------------------------------------------------------------------------------------------------------------------------------------------------------------------------------
      gi|37559858|gb|CF662663.1|CF662663     ATTTGTGAAGCTTGATTGCTCTGAATCTGGTGCTGATGATGGAGAGCGTGCAGCAGACGATCACGAGGGTCTCTCAGGAGCTGAACTGCAGTCCCACGTCCCTCAGGGTGGCAGAACATCTGGACCGACACGATGAGCTGCGACTGCTGCGCCAGGAGTTCCTCATACCTAAAATATCTGACCTGCCACCGTCGGATTTGTCACTTGTGGATGGTTCTGAAGATTGTATTTATTTCGCTGGGAATTCACTGGGTCTCCAGCCGAAAAACACCAAAAAATACATCGAAGAGGAGCTGGAGAAATGGGCCACAATTGGTGTCCATGGCCACCTGAAGGGGTCGCGACCTTGGGCCTGGGC*TGAGGATACCCTGGAGGAGCTGATGGCAAAAGATCGTTGGTGCTAAACCTGAGGAAGTGGTTTTGATGAATGGATTGACAGTCAATCTGCATCTTCTGATGCTTTCCTTCTACAAACCGTCTCCAAAACGCTATAAGATTCTTCTAGAAGACAAGGCCTTTCCATCAGACCACTACGCCATTGAATCTCAGATCCGGCTGAGAGGACTGGACG*TGACCGACAGCATGCTGATCATTAAACCAAGACAGGGTGAAGACACCATCAGGACAGAGGATATCGTGTCGGTCATCGAGCGGGAGGGCGACGCCATCGCTCTGGTCATGCTCAGCGGCGTTCAGTATTACACCGGTCAGCTCTTCAACATGGAGGCCATTACCAGTGCAGGACACGCCAAGGGGTGTTGGNTAAGGGTTTTGAATTGTGCACACGCCCGTAGGAAACGCTGAACTGCAACTTCACGACTGGAAATGTGGAATTTTGGCGTGGCTGGTGCTCTTATAAAGTATGTGAACTCAGGGGGCCCGGTGGTTTCTGGCTTGGGAGCTTATATTACATGAAGAAACACGCCTCACAGCCGTCCAGCCCACTCTGATGGGGCCTGGGTGGGGGACACCAACCTGAAGAACCAGAATTCTTCATTGAACCACGAAAATGGAGCTTTCCGCCCTGGGTGGTTAAAAGGAATTCCGTCTGGTCCAACCAGCCTGTTTTTAT
      gi|50733142|gb|CO729448.1|CO729448     ATTTGTGAAGCTTGATTGCTCTGAATCTGGTGCTGATGATGGAGAGCGTGCAGCAGACGATCACGAGGGTCTCTCAGGAGCTGAACTGCAGTCCCACGTCCCTCAGGGTGGCAGAACATCTGGACCGACACGATGAGCTGCGACTGCTGCGCCAGGAGTTCCTCATACCTAAAATATCTGACCTGCCACCGTCGGATTTGTCACTTGTGGATGGTTCTGAAGATTGTATTTATTTCGCTGGGAATTCACTGGGTCTCCAGCCGAAAAACACCAAAAAATACATCGAAGAGGAGCTGGAGAAATGGGCCACAATTGGTGTCCATGGCCACCTGAAGGGGTCGCGACCTTGGGCCTGGGC*TGAGGATACCCTGGAGGAGCTGATGGCAAAAGATCGTTGGTGCTAAACCTGAGGAAGTGGTTTTGATGAATGGATTGACAGTCAATCTGCATCTTCTGATGCTTTCCTTCTACAAACCGTCTCCAAAACGCTATAAGATTCTTCTAGAAGACAAGGCCTTTCCATCAGACCACTACGCCATTGAATCTCAGATCCGGCTGAGAGGACTGGACG*TGACCGACAGCATGCTGATCATTAAACCAAGACAGGGTGAAGACACCATCAGGACAGAGGATATCGTGTCGGTCATCGAGCGGGAGGGCGACGCCATCGCTCTGGTCATGCTCAGCGGCGTTCAGTATTACACCGGTCAGCTCTTCAACATGGAGGCCATTACCAGTGCAGGACACGCCAAGGGGTG                                                                                                                                                                                                                                                                                                                          
      gi|50741230|gb|CF662339.2|CF662339                                                                                                                    LLLAACATCTGGACCGACGCGATGATCTGCTACTGCTGCGCCAAGAGTTCCTCATACCTAAAATATCTGACCTGCCACCGACGGAATTGTCAATTGTGGATGGTTCTGAAGATTGCATTTCTTTCGCTGGGAATTCACTGGGTCTCCAGCCTAAAAACACCAAACAGTACATCGAAGAGGAGCTGGAGAAATGGGCCACAATTGGTGTCCATGGCCACCCGAAGGGGTCTCGACCTTGGGCCTGGGCATGAGGATACCCTGGAGGAGCTGATGGCAAAAGATCGTTGGTGCTCAACCTGAGGAAGTGGTTTTGATGAATGGATTGACAGTCAATCTGCATCTTCTGATGCGTTCCTTCTACAAACCGTCTCCAAAACGCTATAAGATTCTACTAGATGACAAGGCCTTTCCATCAGACCACTACGCCATTGAATCTCATATCCGGCTGAGAGGACTGGACG*TGACCGACATCATGCTGATCATTATACCACCACAAGGTGAACACACCATCAGGACTGATGATATCATGTCGGTCATCGAGCGGGAGGGCGACGCCATCTCTCTGGT                                                                                                                                                                                                                                                                                                                                                                                                           
      gi|50739831|gb|CA966348.2|CA966348                                                                                                                                                                                                                                                                                                                                                                                                                             TGAGGAAGTGGTTTTGATGAATGGATTGACAGTCAATCTGCATCTTCTGATGCTTTCCTTCTACAAACCGTCTCCAAAACGCTATAAGATTCTTCTAGAAGACAAGGCCTTTCCATCAGAGGGCTACGCCATTGAATCTCAGATCCGGCTGAGAGGACTGGACACTGACCGACAGCATGCTGATCATTAAACCAAGACAGGGTGAAGACACCATCAGGACAGAGGATATCGTGTCGGTCATCGAGCGGGAGGGCGACGCCATCGCTCTGGTCATGCTCAGCGGCGTTCAGTATTACACCGGTCAGCTCTTCTACATGGAGGCCATTACCAGGGCGGGACGCGCCAAGGGGTGTTTGGTA*GGGTTT*GA*TTGTGCACACGCC*GTAGGAAACGCTGAACTGCAACTTCACGACTGGAA*TGTGGA*TTTTG*CGTG*CTGGTGCTCTTATAA*GTATGTGAACTCAGGGG**CCGGTGGTLLLLL                                                                                                                                                                                    
      gi|50738227|gb|CA965032.2|CA965032                                                                                                                                                                                                                                                                                                                                                                                                                                                                                                                                                                                        GACTGGACG*TGACCTACAGCATGCTGATCATTATACCAATACAGGGTGAAGACACCCTCAGGACATAGGATATCCTGTCGGTCATCGAGCGGGAGGGCGACGCCATCGCTCTGGTCATGCTCAGCGGCGTTCAGTATTACACCGGTCAGCTCTTCLLL                                                                                                                                                                                                                                                                                                                                                                
Putative SNPs: 598A>T

41.
                                                                                                                                                100                                                                                                 200                                                                                                 300                                                                                                 400                                                                                                 500                                                                                                 600                                                                                                 700                                                                                                 800                                                                                                 900                                                                                                 1000                                                                                                1100
                                             .........+.........+.........+.........+.........+.........+.........+.........+.........+.........|.........+.........+.........+.........+.........+.........+.........+.........+.........+.........|.........+.........+.........+.........+.........+.........+.........+.........+.........+.........|.........+.........+.........+.........+.........+.........+.........+.........+.........+.........|.........+.........+.........+.........+.........+.........+.........+.........+.........+.........|.........+.........+.........+.........+.........+.........+.........+.........+.........+.........|.........+.........+.........+.........+.........+.........+.........+.........+.........+.........|.........+.........+.........+.........+.........+.........+.........+.........+.........+.........|.........+.........+.........+.........+.........+.........+.........+.........+.........+.........|.........+.........+.........+.........+.........+.........+.........+.........+.........+.........|.........+.........+.........+.........+.........+.........+.........+.........+.........+.........|.........+.........+.........+.........+..
        Cyprinus_Cluster8048.seq.Contig1     GGGGGTTGTCCAAAGGAGAAAAATGGCGATGGGTTGCTTGTCAATGAGGAACACCGCGACTCCTGCAACATTAACCTGCAAAAGACG*GCGTGCTACAATGGTTCCCACGTTGTCTGGCGGATTCAGCAGAAGCGCTCTGCGGGTTTTATCCGTGGCGTTAATGTTGCAGGCAGTTTTAGGAGACGGAAAGACTCTCGTTCTGCTGGACAATCCTAACATCAGAGACACTCATTCAATCTTCTTCCGCAGTTTAGCAGATCGTGGGTTTGACCTTACATTTAAGACTGTTGATGATCCTGGTCTCTCTTTGATCAAGTATGGCCAGTTCCTCTACGACCATCTCATCATTTTCTCTCCATCAGTGGAAGATTTTGGGGGCAGCATCAATGTAGAGACCATTACAGCCTTCATTGACGGTGGAGGAAATGTTCTCGTTGCTGCCAGCTCTGATATTGGTGACCCTCTGAGAGAGCTAGGCAGTGAATGTGGGATTGAATTTGATGAGGAGAAAACTGCTGTCATTGACCACCATAACTATGACGTTTCTGATCCTGGTGAGCACACCCTGATTGTTGCAGACCCAGAGAATCTTCTTAAATCCCCAACTATAGTTGGCAAGCCCACTGATAAACCAGTCCTGTTCAAAGGTGTTGGCATGGTGGCTGATCCAGATAACTCTCTGGTGCTGGACATTCTGACAGGATCCTCCACCTCTTACTCCTACTTCCCGGATCGCCCCATCACACAGTATCCTCATGCGGTTGGAAAGAACACCCTCCTGATCGCCGGTCTGCAGGCAAGAAACAATGCACGTGTGGTTTTCAGCGGGTCACTGCACTTCTTCAGTGATGCTTTCTTCAACTCCCCTGTGCAGAAGGCTGCCTCTGGGTCAAAGAGGTATGAACAGACTGGTAACCAGGAGCTGGCTGAGGCCCTGTCTCGCTGGGTGTTTAAGGAGGCTGGTGTTCTGAGGGTTGGGGCTGTTACCCATCATCCAGTTGGAGAGAGTACTCCACCTGCTGCCTACACCAGCACTGACCTTGTGGAATACAGCATTGTGATTGAGATGTTGTCTGGTGGAAAGTGGGTGCCTTTTGATGGAGATGACATCCAGCTGGAATTTGTCAGAATTGATCCATTT
                                             --------------------------------------------------------------------------------------------------------------------------------------------------------------------------------------------------------------------------------------------------------------------------------------------------------------------------------------------------------------------------------------------------------------------------------------------------------------------------------------------------------------------------------------------------------------------------------------------------------------------------------------------------------------------------------------------------------------------------------------------------------------------------------------------------------------------------------------------------------------------------------------------------------------------------------------------------------------------------------------------------------------------------------------------------------------------------------------------------------------------------------------------------------------------------------------
     gi|109281765|gb|EC393440.1|EC393440     GGGGGTTGTCCAAAGGAGAAAAATGGCGATGGGTTGCTTGTCAATGAGGGACACTGCGACTCCTGCAACATTAACCTGCAAAAGACGAGC*TGCTACAATGGTCCCCACGTCGTCTGGTGGGTTCAGCAGCAGCGCTCTGTTTGTTTTATCCGTGGCGTTAATGTTGCAGGCAGTTTTAGGAGACGGAAAGACTCTCGTTCTGCTGGACAATCCTAACATCAGAGACACTCATTCAATCTTCTTCCGCAGTTTAGCAGATCGTGGGTTTGACCTTACCTTCAAGACTGCTGATGATCCTGGTCTCTCTTTGATCAAGTATGGCCAGTTCCTCTACGACCATCTCATCATTTTCTCTCCATCAGTGGAAGATTTTGGGGGCAACATCAATGTAGAGACCATTACAGCCTTCATTGACGGTGGAGGGAATGTTCTCGTTGCTGCCAGCTCTGATATTGGTGACCCTTTGAGAGAGCTAGGCAGTGAATGTGGGATTGAATTTGATGAGGAGAAAACTGCTGTTATTGATCACCATAACTATGACGTTTCTGATCCTGGTGAGCACACCCTGATTGTCGCAGACCCAGAGAATCTTCTNTAATCCCCAACTATAGTTGGCAAGCCCACTGATAAACCAGTCCTGTTCAAAGGTGTTGGCATGGTGGCTGATCCAGATAACTCTCTGGTGCTGGACATTCTGACAGGATCCT                                                                                                                                                                                                                                                                                                                                                                                                                                                  
     gi|109281360|gb|EC393235.1|EC393235     GGGGGTTGTCCAAAGGAGGAAAATGGCGATGGGTTGCTTGTCAATGAGGAACACCGCGACTCCTGCAACATTAACCTGCAAAAGACG*GCGTGCTACAATGGTTCCCACGTTGTCTGGCGGATTCAGCAGAAGCGCTCTGCTGGTTTTATCCGTGGCGTTAATGTTGCAGGCAGTTTTAGGAGACGGAAAGACTCTCGTTCTGCTGGACAATCCTAACATCAGAGACACTCATTCAATCTTCTTCCGCAGTTTAGCAGATCGTGGGTTTGACCTTACATTTAAGACTGTTGATGATCCTGGTCTCTCTTTGATCAGGTATGGCCAGTTCCTCTACGACCATCTCATCATTTTCTCTCCATCAGTGGAAGATTTTGGGGGCAGCATCAATGTAGAGACCATTACAGCCTTCATTGACGGTGGAGGAAATGTTCTCGTTGCTGCCAGCTCTGATATTGGTGACCCTCTGAGAGAGCTAGGCAGTGAATGTGGGATTAAATTTGATGAGGAGAAAACTGCTGTCATTGACCACCATAACTATGACGTTTCTGATCCTGGTGAGCACACCCTGATTGTTGCAGATCCAGAGAATCTTCTTAAAGCCCCAACTATAGTTGGCAAGCCCACTAATAAACCAGTCCTGTTCAAAGGTGTTGGCATGGTGGCTGATCCAGATAACTCTCTGGTGCTGGACATTCT                                                                                                                                                                                                                                                                                                                                                                                                                                                             
      gi|50736427|gb|CA969976.2|CA969976              LLLLLLLLLLLAAATGGCGATGGGTTGCTTGTCAATGAGGAACACCGCGACTCCTGCAACATTAACCTGCAAAAGACG*GCGTGCTACAATGGTTCCCACGTTGTCTGGCGGATTCAGCAGAAGCGCTCTGCGGGTTTTATCCGTGACGTTAATGTTGCAGGCAGTTTTAGGAGACGGAAAGACTCTCGTTCTGCTGGACAATCCTAACATCAGAGACACTCATTCAATCTTCTTCCGCAGTTTAGCAGATCGTGGGTTTGACCTTACATTTAAGACTGTTGATGATCCTGGTCTCTCTTTGATCAAGTATGGCCAGTTCCTCTACGACCATCTCATCATTTTCTCTCCATCAGTGGAAGATTTTGGGGGCAGCATCAATGTAGAGACCATTACAGCCTTCATTGACGGTGGAGGAAATGTTCTCGTTGCTGCCAGCTCTGATATTGGTGACCCTCTGAGAGAGCTAGGCAGTGAATGTGGGATTGAATTTGATGAGGAGAAAACTGCTGTCATTGACCACCATAACTATGACGTTTCTGATCCTGGTGAGCACACCCTGATTGTTG                                                                                                                                                                                                                                                                                                                                                                                                                                                                                                                                                                                      
      gi|50733785|gb|CA967740.2|CA967740                                                                                                                                                                                                                                                                                                                                                                                                                                  LLLGGTGGAGGAAATGTTCTCGTTGCTGCCAGCTCTGATATTGGAGACCCTCTGAGAGAGCTAGGCAGTGAATGTGGGATTGAATTTGATGAGGAGAAAACT                                                                                                                                                                                                                                                                                                                                                                                                                                                                                                                                                                                                                                                   
     gi|109280663|gb|EC392874.1|EC392874                                                                                                                                                                                                                                                                                                                                                                                                                                                                                                          LLLGGGATTGAATTTGATGAGGAGAAAACTGCTGTTATTAATCACCATAACTATGACGTTTCTGATCCTGGTGAGCACACCCTGATTGTTGCAGACCCAGAGAATCTTCTTAAATCCCCAACTATAGTTGGCAAGCCCACTGATAAACCAGTCCTGTTCAAAGGTGTTGGCATGGTGGCTGATCCAGATAACTCTCTGGTGCTGGACATTCTGACAGGATCCTCCACCTCTTACTCCTACTTCCCGGATCGCCCCATCACACAGTATCCTCATGCGGTTGGAAAGAACACCCTCCTGATCGCCGGTCTGCAGGCAAGAAACAATGCACGTGTGGTTTTCAGCGGGTCACTGCACTTCTTCAGTGATGCTTTCTTCAACTCCCCTGTGCAGAAGGCTGCCTCTGGGTCAAAGAGGTATGAACAGACTGGTAACCAGGAGCTGGCTGAGGCCCTGTCTCGCTGGGTGTTTAAGGAGGCTGGTGTTCTGAGGGTTGGGGCTGTTACCCATCATCCAGTTGGAGAGAGTACTCCACCTGCTGCCTACACCAGCACTGACCTTGTGGAATACAGCATTGTGATTGAGATGTTGTCTGGTGGAAAGTGGGTGCCTTTTGATGGAGATGACATCCAGCTGGAATTTGTCAGAATTGATCCATTT

Putative SNPs: 521T>C, 527T>C

42.
                                                                                                                                                100                                                                                                 200                                                                                                 300                                                                                                 400                                                                                                 500                                                                                                 600                                                                                                 700
                                             .........+.........+.........+.........+.........+.........+.........+.........+.........+.........|.........+.........+.........+.........+.........+.........+.........+.........+.........+.........|.........+.........+.........+.........+.........+.........+.........+.........+.........+.........|.........+.........+.........+.........+.........+.........+.........+.........+.........+.........|.........+.........+.........+.........+.........+.........+.........+.........+.........+.........|.........+.........+.........+.........+.........+.........+.........+.........+.........+.........|.........+.........+.........+.........+.........+.........+.........+.........+.........+.........|.........+.........+..
        Cyprinus_Cluster8050.seq.Contig1     GGGGGGATGAGAGGTGAACTAAACTGGAGAGAAGTGCTCCTTCAAGGAAGGCAACGGGAAGTGGCCACCGACGGACTTATTCGTTGACCAAAGTCTGCAATCGGACATTTATGACTGCAGTTCTTCATCGCAGTTGAGACCCCCCCTCAAACAGGCTCATTTCCCGCCCACTGGAGCGAGTTTTGTCGCTGTGGAAGTGGACTCGGTACTTCTCCCGCTGCTAGTTAGCGAGCTAGCTCGTCTAGTTCGTTGATGCGTGGATTTGACAGCCACACCATCGTTTTTTT*CGGTCAATGCCATATAAACAAAGGCCGTTTACGACTGAGAACAGATCAGAACGTGTCCCGGCAGTAGGAGTGAGGCTGAGCTTTAGAAGAGGAAAATGAGTGAACTGGACCAGTTACGCCAGGAGGCCGAGCAGCTGAAGAACCAGATCAGAGATGCAAGGAAAGCTTGTGCAGATGCCACACTATCACAGATCACAGCCAACATCGACCCTGTTGGCCGAATCCAGATGCGCACAAGAAGAACACTGCGAGGACATCTGGCTAAAATCTACGCCATGCACTGGGGCACCGATTCCAGGCTGCTCGTCAGTGCCTCCCAGGATGGAAAACTCATTATTTGGGACAGTTATACCACAAATAAGGTCCACGCCATTCCTCTGCGCTCCTCCTGGGTGATGACCTGTGCCTACGCTCCTTCAGGGAATTATGTTGCT
                                             --------------------------------------------------------------------------------------------------------------------------------------------------------------------------------------------------------------------------------------------------------------------------------------------------------------------------------------------------------------------------------------------------------------------------------------------------------------------------------------------------------------------------------------------------------------------------------------------------------------------------------------------------------------------------------------------------------------------------------------------------
     gi|109281080|gb|EC393091.1|EC393091     GGGGGGATGAGAGGTGAACTAAACTGGAGAGAAGTGCTCCTTCAAGGAAGGCAACGGGAAGTGGCCACCGACGGACTTATTCGTTGACCAAAGTCTGCAATCGGACATTTATGACTGCAGTTCTTCATCGCAGTTGAGACCCCCCCTCAAACAGGCTCATTTCCCGCCCACTGGAGCGAGTTTTGTCGCTGTGGAAGTGGACTCGGTACTTCTCCCGCTGCTAGTTAGCGAGCTAGCTCGTCTAGTTCGTTGATGCGTGGATTTGACAGCCACACCATCGTTTTTTT*CGGTCAATGCCATATAAACAAAGGCCTTTTACGACTGAGAACAGATCAGAACGTGTCCCGGCAGTAGGAGTGAGGCTGAGCTTTAGAAGAGGAAAATGAGTGAACTGGACCAGTTACGCCAGGAGGCCGAGCAGCTGAAGAACCAGATCAGAGATGCAAGGAAAGCTTGTGCAGATGCCACACTATCACAGATCACAGCCAACATCGACCCTGTTGGCCGAATCCAGATGCGCACAAGAAGAACACTGCGAGGACATCTGGCTAAAATCTACGCCATGCACTGGGGCACCGATTCCAGGCTGCTCGTCAGTGCCTCCCAGGATGGAAAACTCATTATTTGGGACAGTTATACCACAAATAAGGTCCACGCCATTCCTCTGCGCTCCTCCTGGGTGATGACCTGTGCCTACGCTCCTTCAGGGAATTATGTTGCT
     gi|109280455|gb|EC392769.1|EC392769     GGGGGGATGAGAGGTGAACTAAACTGGAGAGAAGTGCTCCTTCAAGGAAGGCAACGGGAAGTGGCCACCGACGGACTTATTCGTTGACCAAAGTCTGCAATCGGACATTTATGACTGCAGTTCTTCATCGCAGTTGAGACCCCCCCTCAAACAGGCTCATTTCCCGCCCACTGGAGCGAGTTTTGTCGCTGTGGAAGTGGACTCGGTACTTCTCCCGCTGCTAGTTAGCGAGCTAGCTCGTCTAGTTCGTTGATGCGTGGATTTGACAGCCACACCAGCGTTTTTTTTCGGTCAATGCCATATAAACAAAGGCCTTTTACGACTGAGAACAGATCAGAACGTGTCCCGGCAGTAGGAGTGAGGCTGAGCTTTAGAAGAGGAAAATGAGTGAACTGGACCAGTTACGCCAGGAGGCCGAGCAGCTGAAGAACCAGATCAGAGATGCAAGGAAAGCTTGTGCAGATGCCACACTATCACAGATCACAGCCAACATCGACCCTGTTGGCCGAATCCAGATGCGCACAAGAAGAACACTGCGAGGACATCTGGCTAAAATCTACGCCATGCACTGGGGCACCGATTCCAGGCTGCTCGTCAGTGCCTCCCAGGATGGAAAACTCATTATTTGGGACAGTTATACCACAAATAAGGTCCACGCCATTCCTCTGCGCTCCTCC                                             
     gi|109281688|gb|EC393400.1|EC393400      GGGGGATGAGAGGTGAACTAAACTGGAGAGAAGTGCTCCTTCAAGGAAGGCAACGGGAAGTGGCCACCGACGGACTTATTCGTTGACCAAAGTCTGCAATCGGACATTTATGACTGCAGTTCTTCATCGCAGTTGAGACCCCCCCTCAAACAGGCTCATTTCCCGCCCACTGGAGCGAGTTTTGTCGCTGTGGAAGTGGACTCGGTACTTCTCCCGCTGCTAGTTAGCGAGCTAGCTCGTCTAGTTCGTTGATGCGTGGATTTGACAGCCACACCATCGTTTTTTT*CGGTCAATGCCATATAAACAAAGGCCTTTTACGACTGAGAACAGATCAGAACGTGTCCCGGCAGTAGGAGTGAGGCTGAGCTTTAGAAGAGGAAAATGAGTGAACTGGACCAGTTACGCCAGGAGGCCGAGCAGCTGAAGAACCAGATCAGAGATGCAAGGAAAGCTTGTGCAGATGCCACACTATCACAGATCACGGCCAACATCGACCCTGTTGGCCGAATCCAGATGCGCACAAGAAGAACACTGCGAGGACATCTGGCTAAAATCTACGCCATGCACTGGGGCACCGATTCCAGGCTGCTCGTCAGTGCCTCCCAGGATGGAAAACTCATTATTTGGGACAGTTATACCACAAATAAGGTCCACGCCATTCCTCTGCGCTCCTCCTGG*TGATGACCTGTGCCTA                         
     gi|109281263|gb|EC393185.1|EC393185                LLLLGAACTAAACTGGAGAGAAGTGCTCCTTCAAGGAAGGCAACGGGAAGTGGCCACCGACGGACTTATTCGTTGACCAAAGTCTGCAATCAGACATTTATGACTGCAGTTCTTCATCGCAGTTGAGACCCCCCCTCAAACAGGCTCATTTCCCGCCCACTGGAGCGAGTTTTGTCGCTGTGGAAGTGGACTCGGTACTTCTCCCGCTGCTAGTTAGCGAGCTAGCTCGTCTAGTTCGTTGATGCGTGGATTTGACAGCCACACCATCGTTTTTTT*CGGTCAATGCCATATAAACAAAGGCCGTTTACGACTGAGAACAGATCAGAACGTGTCCCGGCAGTAGGAGTGAGGCTGAGCTTTAGAAGAGGAAAATGAGTGAACTGGACCAGTTACGCCAGGAGGCCGAGCAGCTGAAGAACCAGATCAGAGATGCAAGGAAAGCTTGTGCAGATGCCACACTATCACAGATCACAGCCAACATCGACCCTGTTGGCCGAATCCAGATGCGCACAAGAAGAACACTGCGAGGACATCTGGCTAAAATCTACGCCATGCACTGGGGCACCGATTCCAGGCTGCTCGTCAGTGCCTCCCAGGATGGAAAACTCATTATTTGGGACAGTTATACCGCAAATAAGGTCCACGCCATTCCTCTGCGCTCCTCCTGGGTGATGACCTGTGCCTACGCTCCTTCAG              
     gi|109280921|gb|EC393010.1|EC393010                LLLLGAACTAAACTGGAGAGAAGTGCTCCTTCAAGGAAGGCAACGGGAAGTGGCCACCGACGGACTTATTCGTTGACCAAAGTCTGCAATCAGACATTTATGACTGCAGTTCTTCATCGCAGTTGAGACCCCCCCTCAAACAGGCTCATTTCCCGCCCACTGGAGCGAGTTTTGTCGCTGTGGAAGTGGACTCGGTACTTCTCCCGCTGCTAGTTAGCGAGCTAGCTCGTCTAGTTCGTTGATGCGTGGATTTGACAGCCACACCATCGTTTTTTT*CGGTCAATGCCATATAAACAAAGGCCGTTTACGACTGAGAACAGATCAGAACGTGTCCCGGCAGTAGGAGTGAGGCTGAGCTTTAGAAGAGGAAAATGAGTGAACTGGACCAGTTACGCCAGGAGGCCGAGCAGCTGAAGAACCAGATCAGAGLLLLLLLLLLLLLLLLLLLLLLLLLLLLLLLLLLLLLLLLLLLLLLLLLLLLLLLLLLLLLLLLLLLLLLLLLLLLLLLLLLLLLLLLLLLLLLLLLLLLLLLLLLLLLLLLLLLLLLLLLLLLLLLLLLLLLLLLLLLLLLLLLLLLLLLLLLLLLLLLLLL                                                                                                                      

Putative SNPs: 103G>A, 315T>G

43.
                                                                                                                                                100                                                                                                 200                                                                                                 300                                                                                                 400                                                                                                 500                                                                                                 600                                                                                                 700                                                                                                 800                                                                                                 900                                                                                                 1000
                                             .........+.........+.........+.........+.........+.........+.........+.........+.........+.........|.........+.........+.........+.........+.........+.........+.........+.........+.........+.........|.........+.........+.........+.........+.........+.........+.........+.........+.........+.........|.........+.........+.........+.........+.........+.........+.........+.........+.........+.........|.........+.........+.........+.........+.........+.........+.........+.........+.........+.........|.........+.........+.........+.........+.........+.........+.........+.........+.........+.........|.........+.........+.........+.........+.........+.........+.........+.........+.........+.........|.........+.........+.........+.........+.........+.........+.........+.........+.........+.........|.........+.........+.........+.........+.........+.........+.........+.........+.........+.........|.........+.........+.........+.........+.........+.........+.........+.........+.........+.........|.........+.........+.........+.........+.........+.........+.........+......
        Cyprinus_Cluster8052.seq.Contig2     GGGCTCACTCACTCTCACCGTGCTCAGCGGCTCTCACTGCTCTTCTTGCAGCTAAGGATACTTATTTAACATTCCTACAACAAATCGTGATCATGGCCTCAGTAATGCAGAAGCTGATCACCCCTCTGGCCAGCGGCCCCGCTGAGCCCCCCAGGAACAAAGTCACAATTGTTGGCGTGGGGCAGGTGGGCATGGCATGTGCCGTCAGCATCCTGCTCCGGGAGCTTGCAGATGAACTGGCTCTGGTGGATGTTGTGGAGGATAGACTGAAGGGGGAGATGCTGGATCTGCAACATGGCAGCCTTTTCCTCAAGACCCCTAAGATTGTGGCTGATAAGGACTACTCTGTGACTGCTAACTCTCGTATCGTGGTGGTGACGGCCGGAGTGCGTCAACAGGAGGGTGAGAGCAGATTGAACCTGGTGCAGAGGAACGTCAACATTTTCAAACACATCATCCCTCAGATTGTCAAATACAGTCCTGACTGCACCCTCATTGTGGTGTCCAATCCAGTGGATGT*TTTGACCTACGTGACATGGAAGCTGAGCGGCCTGCCAAAGCACCGTGTCATCGGCAGCGGGACCAACCTGGACTCCGCTCGTTTCCGCTACATCATGGCTGAGAAACTAGGCATCCACTCCAGCAGCTTCAACGGCTACATCCTGGGAGAGCACGGAGACTCCAGCGTGCCTGTATGGAGTGGAGTAAATGTGGCTGGAGTGAGCCTGCAGAAACTCAACCCTGACATCGGCACAGATAAAGACAGCGAGAACTGGAAGGAAGCTCACAAGATGGTTGTGGACAGTGCCTACTAAGTGATCAGGCTGAAGGGATACACTAACTGGGCCATCGGCCTCAGT*GTGGCCGACCTGACCGAGACCCTGGTGAAGAACCTGAACAGGGTCCACCCTGTCTCCACCATGGTGAAGGGCATGTATGGTATTGGTGAGGAGGTGTACCTGAACCTGCCCTGTGTGCTGAACAGCAGCGGAGTGGGCAGCGTTATCAACATGACCCTGACCGATGAAGAAATCGCTCAGCTGAAGAAGAGCGCGGATACTCTGTGGGGGATCC
                                             --------------------------------------------------------------------------------------------------------------------------------------------------------------------------------------------------------------------------------------------------------------------------------------------------------------------------------------------------------------------------------------------------------------------------------------------------------------------------------------------------------------------------------------------------------------------------------------------------------------------------------------------------------------------------------------------------------------------------------------------------------------------------------------------------------------------------------------------------------------------------------------------------------------------------------------------------------------------------------------------------------------------------------------------------------------------------------------------------------------------
      gi|50742297|gb|CF660439.2|CF660439     GGGCTCACTCACTCTCACCGTGCTCAGCGGCTCTCACTGCTCTTCTTGCAGCTAAGGATACTTATTTAACATTCCTACAACAAATCGTGATCATGGCCTCAGTAATGCAGAAGCTGATCACCCCTCTGGCCAGCGGCCCCGCTGAGCCCCCCAGGAACAAAGTCACAATTGTTGGCGTGGGGCAGGTGGGCATGGCATGTGCCGTCAGCATCCTGCTCCGGGAGCTTGCAGATGAACTGGCTCTGGTGGATGTTGTGGAGGATAGACTGAAGGGGGAGATGCTGGATCTGCAACATGGCAGCCTTTTCCTCAAGACCCCTAAGATTGTGGCTGATAAGGACTACTCTGTGACTGCTAACTCTCGTATCGTGGTGGTGACGGCCGGAGTGCGTCAACAGGAGGGTGAGAGCAGATTGAACCTGGTGCAGAGGAACGTCAACATTTTCAAACACATCATCCCTCAGATTGTCAAATACAGTCCTGACTGCACCCTCATTGTGGTGTCCAATCCAGTGGATGT*TTTGACCTACGTGACATGGAAGCTGAGCGGCCTGCCAAAGCACCGTGTCATCGGCAGCGGGACCAACCTGGACTCCGCTCGTTTCCGCTACATCATGGCTGAGAAACTAGGCATCCACTCCAGCAGCTTCAACGGCTACATCCTGGGAGAGCACGGAGACTCCAGCGTGCCTGTATGGAGTGGAGTAAATGTGGCTGGAGTGAGCCTGCAGAAACTCAACCCTGACATCGGCACAGATAAAGACAGCGAGAACTGGAAGGAAGCTCACAAGATGGTTGTGGACAGTGCCT                                                                                                                                                                                                                                                                         
      gi|50743263|gb|CF661066.2|CF661066                                                      AGCTAAGGATACTTATTTAACATTCCTACAACAAACCTTGATCATGGCCTCAGTAATGCAGAAGCTGATCACCCCTCTGGCCAGCGGCCCCGCTGAGCCCCCCAGGAACAAAGTCACAATTGTTGGCGTGGGGCAGGTGGGCATGGCATGTGCCGTCAGCATCCTGCTCCGGGAGCTTGCAGATGAACTGGCTCTGGTGGATGTTGTGGAGGATAGACTGAAGGGGGAGATGCTGGATCTGCAACATGGCAGCCTTTTCCTCAAGACCCCTAAGATTGTGGCTGATAAGGACTACTCTGTGACTGCTAACTCTCGTATCGTGGTGGTGACGGCCGGAGTGCGTCAACAGGAGGGTGAGAGCAGATTGAACCTGGTGCAGAGGAACGTCAACATTTTCAAACACATCATCCCTCAGATTGTCAAATACAGTCCTGACTGCACCCTCATTGTGGTGTCCAATCCAGTGGATGT*TTTGACCTACGTGACATGGAAGCTGAGCGGCCTGCCAAAGCACCGTGTCATCGGCAGCGGGACCAACCTGGACTCCGCTCGTTTCCGCTACATCATGGCTGAGAAACTAGGCATCCACTCCAGCAGCTTCAACGGCTACATCCTGGGAGAGCACGGAGACTCCAGCGTGCCTGTATGGAGTGGAGTAAATGTGGCTGGAGTGAGCCTGCAGAAACTCAACCCTGACATCGGCACAGATAAAGACAGCGAGAACTGGAAGGAAGCTCACAAGATGGTTGTGGACAGTG                                                                                                                                                                                                                                                                            
      gi|28465816|gb|AU301089.1|AU301089                                                                                                                                                                                                                                                                                                                                                                                                                                                         LLLLLLLLLLLLLLLLLLLLLLLLLLLLLLLGTCAAATACAGTCCTGACTGCACCCTCATTGTGGTGTCCAATCCAGTGGATGTGTTTGACCTACGTGACCTGGAAGCTGAGCGGCCTGCCAAAGCACCGTGTCATCGGCAGCGGGACCAACCTGGACTCTGCTCGCTTCCGCCACATCATGGCCGAGAAATTGGGCATCCACTCCAGCAGCTTCAACGGTTATATCCTGGGAGAGCACGGAGACTCCAGTGTGCCTGTGTGGAGCGGAGCAAATGTTGCTGGAGTCAGCCTGCAGAAACTCAACCCTGACATCGGCACAGATAAAGACAGCGAGAACTGGAAGGACGCTCACAAGATGGTTGTGGACAGTGCTTATGAAGTGATCAAGCTGA*GGGTTACACTAACTGGGCCATCGGC*TCAGTTGTGGCCGACCTGACCGAGACCCTGGTGAAGAAC*TGAACAGGGTCCACC*TGTCTCCACCATGGTGAAGGGCATGTATGGTATCGGCGAGGAGGTGTACCTCAGCATGCCCTGTGTGCTGAACAGCAGCGGAGTGGGCAGCGTTATCAACATGACCCTGACCGATGAAGAAATCGCTCAGCTGAAGAAGAGCGCGGATACTCTGTGGGGGATCC
      gi|50735035|gb|CA968812.2|CA968812                                                                                                                                                                                                                                                                                                                                                                                                                                                                                                                                                                         CGGCCTGCCAA*GCACCGTGTCATCGGCAGCGGGACCAACCTGGACTCCGCTCGTTTCCGCTACATCATGGCTGAGAAACTAGGCATCCACTCCAGCAGCTTCAACGGTTACATCCTGGGAGAGCACGGAGACTCCAACGTGCCTGTATGGAGTGGAGTAAATGTGGCTGGAGTGAGCCTGCATAAACTCATCCCTGACATCGGCACAGATAAAGACAGCGAGAACTGGAAGGAAGCTCACAAGATGGTTGTGGACAGTGCCTACTAAGTGATCAGGCTGAAGGGATACACTAACTGGGCCATCGGCCTCAGT*GTGGCCGACCTGACCGAGACCCTGGTGAAGAACCTGAACAGGGTCCACCCTGTCTCCACCATGGTGAAGGGCATGTATGGTATTGGTGAGGAGGTGTACCTGAACCTGCCCTGTGTGCTGAACAG                                                                                         

Putative SNPs: 657C>T

44.
                                                                                                                                                100                                                                                                 200                                                                                                 300                                                                                                 400                                                                                                 500                                                                                                 600                                                                                                 700                                                                                                 800                                                                                                 900                                                                                                 1000
                                             .........+.........+.........+.........+.........+.........+.........+.........+.........+.........|.........+.........+.........+.........+.........+.........+.........+.........+.........+.........|.........+.........+.........+.........+.........+.........+.........+.........+.........+.........|.........+.........+.........+.........+.........+.........+.........+.........+.........+.........|.........+.........+.........+.........+.........+.........+.........+.........+.........+.........|.........+.........+.........+.........+.........+.........+.........+.........+.........+.........|.........+.........+.........+.........+.........+.........+.........+.........+.........+.........|.........+.........+.........+.........+.........+.........+.........+.........+.........+.........|.........+.........+.........+.........+.........+.........+.........+.........+.........+.........|.........+.........+.........+.........+.........+.........+.........+.........+.........+.........|.........+.........+.........+.........+.
        Cyprinus_Cluster8123.seq.Contig1     TTCAAAAAAACACCCGCCCCATTCCAACCTATCCCCCCTTTGCCGATTATTATTCGATGCCCACCGTTTCCCCCGGAAAACGGCATGAGACCACAAAATATTTGGTTTTCTCATCTTTGCCCCCCCAGCTTACCCTTATTCTCCCGCTCTAATTTGTGTGCACTCTGTCGGATACCAATTCACCCGGAAACGGTTTGACCATTCTTACGCCACTCTATAATACGAATATCGCCAATTTAGTATATACTTGACTAATTTTCTTAACTATTATCCCAACTAAAATCTTAAGCCATATTTCACCACATGGACCAACTCCAGTAAGTGCTGAAAAACACAAAACTGAATCCTGAGACTGACCATGATAGTAAGCTTTTTCGACCAATTTGCAAGCCCATCATATCTAGGAATTCCCCTAATTGCTGTCGCAATCGCACTACCCTGAGTACTTTACCCAACCCCACCAGCTCGATGAATTAATAACCGGCTCATCACGATCCAAGGATGATTTATCAACCGATTTACTAACCAACTAATACTACCACTAAATGTAGGAGGACATAAATGAGCACTACTACTAGCCTCATTAATAATTTTCCTAATTACAATTAATATGCTTGGCTTACTACCGTACACCTTCACACCCACAACACAACTATCACTCAATATGGGATTTGCCGTGCCTCTATGACTCGCTACTGTAATTATTGGGATACGAAATCAACCAACAATTGCCCTAGGACACCTACTACCAGAAGGAACACCCATTCCACTGATCCCCGTACTAATTATCATCGAAACAATTAGCTTACTTATCCGCCCATTAGCCCTGGGAGTCCGACTAACAGCCAATCTAACCGCAGGTCACCTATTAATCCAACTCATCGCCACAGCTGTATTTGTTCTCC*TACCAATAATACCAACAGTAGCAATCCTAACCGCTGCCGTACTCTTCCTCCTCACATTACTAGAAGTTGCAGTAGCAATAATCCAAGCTTATGTATTTGTACTTCTTCTAAGCCTATATCTACAAGAAAACGGTT
                                             ---------------------------------------------------------------------------------------------------------------------------------------------------------------------------------------------------------------------------------------------------------------------------------------------------------------------------------------------------------------------------------------------------------------------------------------------------------------------------------------------------------------------------------------------------------------------------------------------------------------------------------------------------------------------------------------------------------------------------------------------------------------------------------------------------------------------------------------------------------------------------------------------------------------------------------------------------------------------------------------------------------------------------------------------------------------------------------
      gi|56145713|gb|AU312524.1|AU312524     TTCAAAAAAACACCCGCCCCATTCCAACCTATCCCCCCTTTGCCGATTATTATTCGATGCCCACCGTTTCCCCCGGAAAACGGCATGAGACCACAAAATATTTGGTTTTCTCATCTTTGCCCCCCCAGCTTACCCTTATTCTCCCGCTCTAATTTGTGTGCACTCTGTCGGATACCAATTCACCCGGAAACGGTTTGACCATTCTTACGCCACTCTATAATACGAATATCGCCAATTTAGTATATACTTGACTAATTTTCTTAACTATTATCCCAACTAAAATCTTAAGCCATATTTCACCACATGGACCAACTCCAGTAAGTGCTGAAAAACACAAAACTGAATCCTGAGACTGACCATGATAGTAAGCTTTT*CGACCAATTTGCAAGCCCATCATATCTAGGAATTCCCCTAATTG*TATCGCAATCGCACTACCCTGAGTACTTTACCCAACCCCACCAACTCGATGAATTAATAACCGGCTCATCACGATCCAAGGATGATTTATCAACCGATTTACTAACCAACTAATACTACCACTAAATGTAGGAGGACATAAATGAGCGCTACTACTAGCCTCATTAATAATTTTCCTAATTACAATTAATATGCTTGGCTTACTACCGTATACCTTCACACCCACAACACAACTATCACTCAATATGGGATTTGCCGTACCTCTATGACTCGCTACTGTAATTATTGGGATACGAAATCAACCAACAGTTGCCCTAGGACACCTACTACCAGAAGGAACACCCATTCCACTGATCCCAGTACTAATTATCATCGAAACAATTAGCCTATTTATCCGCCCATTAGCCCTGGGAGTCCGACTAACAGCCAATCTAACCGCAGGTCACCTATTAATCCAACTCATCGCCACAGCTGTATTTGTTCTCC*TACCAATAATACCAACAGTAGCAATCCTAACCGCTGCCGTACTCTTCCCCCTCACATTACTAGAAGTTGCAGTAGCAATAATCCAAGCTTATGTATTTGTACTTCTTCTAAGCCTATATCTACAAGAAAACGLL 
      gi|17976359|gb|AU240346.1|AU240346                                                                                                                                                                                                                                                                                                                                 AGTAAGTGCTGAAAAACACAAAACTGAATCCTGAGACTGACCATGATAGTAAGCTTTTTCGACCAATTTGCAAGCCCATCATATCTAGGAATTCCCCTAATTGCTGTCGCAATCGCACTACCCTGAGTACTTTACCCAACCCCACCAGCTCGATGAATTAATAACCGGCTCATCACGATCCAAGGATGATTTATCAACCGATTTACTAACCAACTAATACTACCACTAAATGTAGGAGGACATAAATGAGCACTACTACTAGCCTCATTAATAATTTTCCTAATTACAATTAATATGCTTGGCTTACTACCGTACACCTTCACACCCACAACACAACTATCACTCAATATGGGATTTGCCGTGCCTCTATGACTCGCTACTGTAATTATTGGGATACGAAATCAACCAACAATTGCCCTAGGACACCTACTACCAGAAGGAACACCCATTCCACTGATCCCCGTACTAATTATCATCGAAACAATTAGCTTACTTATC                                                                                                                                                                                                                                   
      gi|56145725|gb|AU312536.1|AU312536                                                                                                                                                                                                                                                                                                                                                                                                                                                                                                                                         ATTTACTAACCAACTAATACTACCACTAAATGTAGGAGGACATAAATGAGCGCTACTACTAGCCTCATTAATAATTTTCCTAATTACAATTAATATGCTTGGCTTACTACCGTATACCTTCACACCCACAACACAACTATCACTCAATATGGGATTTGCCGTACCTCTATGACTCGCTACTGTAATTATTGGGATACGAAATCAACCAACAGTTGCCCTAGGACACCTACTACCAGAAGGAACACCCATTCCACTGATCCCAGTACTAATTATCATCGAAACAATTAGCCTATTTATCCGCCCATTAGCCCTGGGAGTCCGACTAACAGCCAATCTAACCGCAGGG*ACCTATTAATCCAACTCATCGCCACAGCTGTATTTGTTCTCCCTACCAATAATACCAACAGTAGCAATCCTAACCGCTGGCGTACTCTTCCTCCTCACATTACTAGAAGTTGCAGTAGCAATAATCCAAGCCTATGTATTTGTACTTCTTCTAAGCCTATATCTACAAGAAAACGGTT
      gi|17976365|gb|AU240352.1|AU240352                                                                                                                                                                                                                                                                                                                                                                                                                                                                                                                                           TTACTAACCAACTAATACTACCACTAAATGTAGGAGGACATAAATGAGCACTACTACTAGCCTCATTAATAATTTTCCTAATTACAATTAATATGCTTGGCTTACTACCGTACACCTTCACACCCACAACACAACTATCACTCAATATGGGATTTGCCGTGCCTCTATGACTCGCTACTGTAATTATTGGGATACGAAATCAACCAACAATTGCCCTAGGACACCTACTACCAGAAGGAACACCCATTCCACTGATCCCCGTACTAATTATCATCGAAACAATTAGCTTACTTATCCGCCCATTAGCCCTGGGAGTCCGACTAACAGCCAATCTAACCGCAGGTCACCTATTAATCCAACTCATCGCCACAGCTGTATTTGTTCTCC*TACCAATAATACCAACAGTAGCAATCCTAACCGCTGCCGTACTCTTCCTCCTCACATTACTAGAAGTTGCAGTAGCAATAATCCAAGCTTATGTATTTGTACTTCTTCTAAGCCTATATCTACAAGAAAACGLLL
      gi|28915953|gb|AU301167.1|AU301167                                                                                                                                                                                                                                                                                                                                                                                                                                                                                                                                                                                      LTGAGCACTACTACTAGCCTCATTAATAATTTTCCTAATTACAATTAATATGCTTGGCTTACTACCGTACACCTTCACACCCACAACACAACTATCACTCAATATGGGATTTGCCGTGCCTCTATGACTCGCTACTGTAATTATTGGGATACGAAATCAACCAACAATTGCCCTAGGACACCTACTACCAGAAGGAACACCCATTCCACTGATCCCCGTACTAATTATCATCGAAACAATTAGCTTACT                                                                                                                                                                                                                                       
Putative SNPs: 568G>A, 631T>C, 679A>G, 728G>A, 778A>C, 806C>T, 809T>C

45.
                                                                                                                                                100                                                                                                 200                                                                                                 300                                                                                                 400                                                                                                 500                                                                                                 600
                                             .........+.........+.........+.........+.........+.........+.........+.........+.........+.........|.........+.........+.........+.........+.........+.........+.........+.........+.........+.........|.........+.........+.........+.........+.........+.........+.........+.........+.........+.........|.........+.........+.........+.........+.........+.........+.........+.........+.........+.........|.........+.........+.........+.........+.........+.........+.........+.........+.........+.........|.........+.........+.........+.........+.........+.........+.........+.........+.........+.........|.........+.........+.........+.........+.........+.........+.........+.........+.........+...
        Cyprinus_Cluster8142.seq.Contig1     GGGGAAAACTGCTGGCCCTGGAACTGCAGCTGGCCATTTACCAACCCCTCCTGGCCCATGACGGTACACCCTGAGCCCAGGTACTCCTTTGCATCCACCTCCTGCTTGATGTGAGGCATCCCAGTAAAGCTGCCCTTGCGACCATCCTGCATGCTGGGGTGAGGGAGTGGGAACTTGAAGGCTGAGTAGGTATACTTTGCGCCGGTGCTTTCGAGGAGCTGCTTTAGCTCGGACACTGGGTCGCTACCGTCTTGGGATGGGTTAACAAAACGAGGCTGGGAATCAGTGTTCACCGTCATCCATGGGTTCCGAGGGGAGCTTTTCTGGCAGCTTCCATCTGTACCCGGGTTCCACTGCTGGGGTCGGAGATTGGGGGTCGATGGGTGTATGCTTGCAAATGGGGACTTGGAGGATGGGTATGTGGAAGCATAGTGAGATGGGCTAGATAAAATGTTTGGTGCAGGGGCCTCACCCTGAGACTGAGGTCTCTGCTGATCCCATGACAGCTCCTTTTGAGGATAATGTCCTAGAGGGATGGACTGTGGCATAGCAGAGGAGGACAAAAGAGGACCAGGTGATGAAGAGACCACTTGTGGCATACTCTGCGGGTAGGAGGTTGGCAGATGCTGATGGTGATTTGCAGGTGAAGATGCGCCTGGAGAAACAACAGTTTGTGGGTCAGTGGCAGACAAC
                                             ---------------------------------------------------------------------------------------------------------------------------------------------------------------------------------------------------------------------------------------------------------------------------------------------------------------------------------------------------------------------------------------------------------------------------------------------------------------------------------------------------------------------------------------------------------------------------------------------------------------------------------------------------------------------------------------------------------------------
     gi|109284551|gb|EC394898.1|EC394898     GGGGAAAACCGCTGGCCCTGGAACTGCAGCTGGCCATTTACCAACCCCTCCTGGCCCATGACGGTACACCCTGAGCCCAGGTACTCCTTTGCATCCACCTCCTGCTTGATGTGAGGCATCCCAGTAAAGCTGCCCTTGCGACCATCCTGCATGCTGGGGTGAGGGAGTGGGAACTTGAAGGCTGAGTAGGTATACTTTGCGCCGGTGCTTTCGAGGAGCTGCTTTAGCTCGGACACTGGGTCGCTACCGTCTTGGGATGGGTTAACAAAACGAGGCTGGGAATCAGTGTTCACCGTCATCCATGGGTTCCGAGGGGAGCTTTTCTGGCAGCTTCCATCTGTACCCGGGTTCCACTGCTGGGGTCGGAGATTGGGGGTCGATGGGTGTATGCTTGCAAATGGGGACTTGGAGGATGGGTATGTGGAAGCATAGTGAGATGGGCTAGATAAAATGTTTGGTGCAGGGGCCTCACCCTGAGACTGAGGTCTCTGCTGATCCCATGACAGCTCCTTTTGAGGATAATGTCCTAGAGGGATGGACTGTGGCATAGCAGAGGAGGACAAAAGAGGACCAGGTGATGAAGAGACCACTTGTGGCATACTCTGCGGGT                                                                                   
     gi|109280541|gb|EC392812.1|EC392812     GGGGAAAACTGCTGGCCCTGGAACTGCAGCTGGCCATTTACCAACCCCTCCTGGCCCATGACGGTACACCCTGAGCCCAGGTACTCCTTTGCATCCACCTCCTGCTTGATGTGAGGCATCCCAGTAAAGCTGCCCTTGCGACCATCCTGCATGCTGGGGTGAGGGAGTGGGAACTTGAAGGCTGAGTAGGTATACTTTGCGCCGGTGTTTTCGAGGAGCTGCTTTAGCTCGGACACTGGGTCGCTACCGTCTTGGGATGGGTTAACAAAACGAGGCTGGGAATCAGTGTTCACCGTCATCCATGGGTTCCGAGGGGAGCTTTTCTGGCAGCTTCCATCTGTACCCGGGTTCCACTGCTGGGGTCGGAGATTGGGGGTCGATGGGTGTATGCTTGCAAATGGGGACTTGGAGGATGGGTATGTGGAAGCATAGTGAGATGGGCTAGATAAAATGTTTGGTGCAGGGGCCTCACCCTGAGACTGAGGTCTCTGCTGATCCCATGACAGCTCCTTTTGAGGATAATGTCCTAGAGGGATGGACTGTGGCATAGCAGAGGAGGACAAAAGAGGACCAGGTGATGAAGAGACCACTTGTGGCATACTCTGCGGGTAGGAGGTTGGCAGATGCTGATGGTGATTTGCAGGTGAAGATGCGCCTGGAGAAACAACAGTTTGTGGGTCAGTGGCA      
     gi|109281281|gb|EC393195.1|EC393195     GGGGAAAACTGCTGGCCCTGGAACTGCAGCTGGCCATTTACCAACCCCTCCTGGCCCATGACGGTACACCCTGAGCCCAGGTACTCCTTTGCATCCACCTCCTGCTTGATGTGAGGCATCCCAGTAAAGCTGCCCTTGCGACCATCCTGCATGCTGGGGTGAGGGAGTGGGAACTTGAAGGCTGAGTAGGTATACTTTGCGCCGGTGCTTTCGAGGAGCTGCTTTAGCTCGGACACTGGGTCGCTACCGTCTTGGGATGGGTTAACAAAACGAGGCTGGGAATCAGTGTTCACCGTCATCCATGGGTTCCGAGGGGAGCTTTTCTGGCAGCTTCCATCTGTACCCGGGTTCCACTGCTGGGGTCGGAGATTGGGGGTCGATGGGTGTATGCTTGCAAATGGGGACTTGGAGGATGGGTATGTGGAAGCATAGTGAGATGGGCTAGATAAAATGTTTGGTGCAGGGGCCTCACCCTGAGACTGAGGTCTCTGCTGATCCCATGACAGCTCCTTTTGAGGATAATGTCCTGGAGGGATGGACTGTGGCATAGCAGAGGAGGACAAAAGAGGACCAGGTGATGAAGAGACCACTTGTGGCATACTCTGCGGGTAGGAGGTTGGCAGATGCTGATGGTGATTTGCAGGTGAAGATGCGCCTGGAGAA*CAACAGTTTGTGGGTCAGTGGCAGACAAC
     gi|109281418|gb|EC393265.1|EC393265     GGGGAAAACTGCTGGCCCTGGAACTGCAGCTGGCCATTTACCAACCCCTCCTGGCCCATGACGGTACACCCTGAGCCCAGGTACTCCTTTGCATCCACCTCCTGCTTGATGTGAGGCATCCCAGTAAAGCTGCCCTTGCGACCATCCTGCATGCTGGGGTGAGGGAGTGGGAACTTGAAGGCTGAGTAGGTATACTTTGCGCCGGTGCTTTCGAGGAGCTGCTTTAGCTCGGACACTGGGTCGCTACTGTCTTGGGATGGGTTAACAAAACGAGGCTGGGAATCAGTGTTCACCGTCATCCATGGGTTCCGAGGGGAGCTTTTCTCGCAGCTTCCACCTGTACCTGGGTTCCACTGCTGGGGTCGGAGATTCGGGGTCGATGGGTGTATACTTGCAAATGGGGACTTGGAGGATGGGTATGTGGAAGCATAGTGAGATGGGCTAGATAAAATGTTTGGTGCAGGGGCCTCACCCTGAGACTGAGGTCTCTGCTGATCCCATGACAGCTCCTTTTGAGGATAATGTCCCAGAGGGATGGACTGTGGCATAGCAGAGGAGGACAAAAGAGGACCAGGTGATGAAGAGACCACTTGTGGCATACTCTGCGGGTAGGAGGTTGGCAGATGCTGATGGTGATTTGCAGGTGAAGATGC                                        
     gi|109282397|gb|EC393774.1|EC393774     GGGGAAAACTGCTGGCCCTGGAACTGCAGCTGGCCATTTACCAACCCCTCCTGGCCCATGACGGTACACCCTGAGCCCAGGTACTCCTTTGCATCCACCTCCTGCTTGATGTGAGGCATCCCAGTAAAGCTGCCCTTGCGACCATCCTGCATGCTGGGGTGAGGGAGTGGGAACTTGAAGGCTGAGTAGGTATACTTTGCGCCGGTGCTTTCGAGGAGCTGCTTTAGCTCGGACACTGGGTCGCTACTGTCTTGGGATGGGTTAACAAAACGAGGCTGGGAATCAGTGTTCACCGTCATCCATGGGTTCCGAGGGGAGCTTTTCTCGCAGCTTCCACCTGTACCTGGGTTCCACTGCTGGGGTCGGAGATTCGGGGTCGATGGGTGTATACTTGCAAATGGGGACTTGGAGGATGGGTATGTGGAAGCATAGTGAGATGGGCTAGATAAAATGTTTGGTGCAGGGGCCTCACCCTGAGGCTGAGGTCTCTGCTGATCCCATGACAGCTCCTTTTGAGGATAATGTCCCAGAGGGATGGACTGTGGCATAGCAGAGGAGGACAAAAGAGGACCAGGTGATGAAGAGACCACTTGTGGCATACTCTGCGGGTAGGAGGTTGGCAGATGCTGATGGTGATTTGCAGGTGAAGATGCGCCTLLLLLLLLLLLLLLLL                    
     gi|109282540|gb|EC393841.1|EC393841     GGGGAAAACTGCTGGCCCTGGAACTGCAGCTGGCCATTTACCAACCCCTCCTGGCCCATGACGGTACACCCTGAGCCCAGGTACTCCTTTGCATCCACCTCCTGCTTGATGTGAGGCATCCCAGTAAAGCTGCCCTTGCGACCATCCTGCATGCTGGGGTGAGGGAGTGGGAACTTGAAGGCTGAGTAGGTATACTTTGCGCCGGTGCTTTCGAGGAGCTGCTTTAGCTCGGACACTGGGTCGCTACTGTCTTGGGATGGGTTAACAAAACGAGGCTGGGAATCAGTGTTCACCGTCATCCATGGGTTCCGAGGGGAGCTTTTCTCGCAGCTTCCACCTGTACCTGGGTTCCACTGCTGGGGTCGGAGATTCGGGGTCGATGGGTGTATACTCGCAAATGGGGACTTGGAGGATGGGTATGTGGAAGCATAGTGAGATGGGCTAGATAAAATGTTTGGTGCAGGGGCCTCACCCTGAGACTGAGGTCTCTGCTGATCCCATGACGGCTCCTTTTGAGGATAATGTCCCAGAGGGATGGACTGTGGCATAGCAGAGGAGGACAAAAGAGGACCAGGTGATGAAGAGACCACTTGTGGCATACTCTGCGGGTAGGAGGTTGG                                                                         

Putative SNPs: 248C>T, 326G>C, 337T>C, 345C>T, 372G>C, 390G>A, 528T>C

46.
                                                                                                                                                100                                                                                                 200                                                                                                 300                                                                                                 400                                                                                                 500                                                                                                 600                                                                                                 700                                                                                                 800                                                                                                 900
                                             .........+.........+.........+.........+.........+.........+.........+.........+.........+.........|.........+.........+.........+.........+.........+.........+.........+.........+.........+.........|.........+.........+.........+.........+.........+.........+.........+.........+.........+.........|.........+.........+.........+.........+.........+.........+.........+.........+.........+.........|.........+.........+.........+.........+.........+.........+.........+.........+.........+.........|.........+.........+.........+.........+.........+.........+.........+.........+.........+.........|.........+.........+.........+.........+.........+.........+.........+.........+.........+.........|.........+.........+.........+.........+.........+.........+.........+.........+.........+.........|.........+.........+.........+.........+.........+.........+.........+.........+.........+.........|.........+.........+.........+.........+.........+.........+.
        Cyprinus_Cluster8184.seq.Contig1     GGAGATTAGATAGGCTATACAGTCAGAATCCAATTGTTTATAAGCACCGTCCGGCACGAATGGCATTTTTGCATGAATGTAAATACTGCTTATATATCAAAAAGGTGCGAAGCTAACGCTCTTCAGTGAATAGAGTGAATGGTCCCGCCTCCTGCTCGTTCTACTACGTCTATCAGCGTCGAGCACATGACTGCAGTAACTGTGTTCTGTAACTCCAGTCACGAGGATGGAGTACTATTACACTGACCAGACAGCGAGCTCAACCCAATAACCCGAAACGAGCACATTTACAGCGCTTACAATATCCCTGCTGACACAAGGACACAGGACAACACCACCGAGCGTTTCCTAAAAGCGTTCAAATGTTACGAAAACGAGTCGTCACCTTTCAGTGACACCTGACACACCGTACACGGAGCGCGCGGTTTGTAAACATGCACGAATTGGCGATTTCATTTAT*GATGCGAAAATGATTCTTCACCGGCACGTGCTATATTTTGAATTAAAAAGAATACATCAATGCACCGCATCCTTAACCCCATCCTTGTCCTGAAATCTATATTCCAGTGAAAGTATCCGTGTTTCAAAGCACGCTTTTGAAGCGTTATATTGTAATTCACTAATCTACGTGTAATGTATCTATAAATAAACACTTTGCGGTTGCCTGCTTGACATGACAAGTGCAAACGCACAGCGTTTATTTATTAATATCAACAGCACACACTGGCACATGATGCAGAGATCGTCTGACTACTTCTAATTAGCATCAAGCTCGTTTTGTAACAGTTACGCAAACGCTTACGAAAACAATGCATTTCGTCAGTTGCGTAAAGAGTTCCGATCTCTACACAGATATGCACCTATATATATATATAACACCTATATGTATACATTTTGTAAGCATATGTATAGGCTACATTTTGTAAAGGCATACAGTGCTGCGTATCATTTTTTCAACTG
                                             -------------------------------------------------------------------------------------------------------------------------------------------------------------------------------------------------------------------------------------------------------------------------------------------------------------------------------------------------------------------------------------------------------------------------------------------------------------------------------------------------------------------------------------------------------------------------------------------------------------------------------------------------------------------------------------------------------------------------------------------------------------------------------------------------------------------------------------------------------------------------------------------------------------------------------------------------------------------------------------------------
      gi|50742789|gb|CF660663.2|CF660663     GGAGATTAGATAGGCTATACAGTCAGAATCCAATTGTTTATAAGCACCGTCCGGCACGAATGGCATTTTTGCATGAATGTAAATACTGCTTATATATCAAAAAGGTGCGAAGCTAACGCTCTTCAGTGAATAGAGTGAATGGTCCCGCCTCCTGCTCGTTCTACTACGTCTATCAGCGTCGAGCACATGACTGCAGTAACTGTGTTCTGTAACTCCAGTCACGAGGATGGAGTACTATTACACTGACCAGACAGCGAGCTCAACCCAATAACCCGAAACGAGCACATTTACAGCGCTTACAATATCCCTGCTGACACAAGGACACAGGACAACACCACCGAGCGTTTCCTAAAAGCGTTCAAATGTTACGAAAACGAGTCGTCACCTTTCAGTGACACCTGACACACCGTACACGGAGCGCGCGGTTTGTAAACATGCACGAATTGGCGATTTCATTTAT*GATGCGAAAATGATTCTTCACCGGCACGTGCTATATTTTGAATTAAAAAGAATACATCAATGCACCGCATCCTTAACCCCATCCTTGTCCTGAAATCTATATTCCAGTGAAAGTATCCGTGTTTCAAAGCACGCTTTTGAAGCGTTATATTGTAATTCACTAATCTACGTGTAATGTATCTATAAATAAACACTTTGCGGTTGCCTGCTTGACATGACAAGTGCAAACGCACAGCGTTTATTTATTAATATCAACAGCACACACTGGCACATGATGCAGAGATCGTCTGACTACTTCTAATTAGCATCAAGCTCGTTTTGTAACAGTTACGCAAACGCTTACGAAAACAATGCATTTCGTCAGTTGCGTAAAGAGTTCCGATCTCTACACAGATATGCACCTATATATATATATAACACCTATATGTATACATTTTGTAAGCATATGTATAGGCTACATTTTLLL                                   
      gi|50742790|gb|CF660664.2|CF660664         ATTAGATAGGCTATACAGTCAGAATCCAATTGTTTATAAGCACCGTCCGGCACGAATGGCATTTTTGCATGAATGTAAATACTGCTTATATATCAAAAAGGTGCGAAGCTAACGCTCTTCAGTGAATAGAGTGAATGGTCCCGCCTCCTGCTCGTTCTACTACGTCTATCAGCGTCGAGCACATGACTGCAGTAACTGTGTTCTGTAACTCCAGTCACGAGGATGGAGTACTATTACACTGACCAGACAGCGAGCTCAACCCAATAACCCGAAACGAGCACATTTACAGCGCTTACAATATCCCTGCTGACACAAGGACACAGGACAACACCACCGAGCGTTTCCTAAAAGCGTTCAAATGTTACGAAAACGAGTCGTCACCTTTCAGTGACACCTGACACACCGTACACGGAGCGCGCGGTTTGTAAACATGCACGAATTGGCGATTTCATTTAT*GATGCGAAAATGATTCTTCACCGGCACGTGCTATATTTTGAATTAAAAAGAATACATCAATGCACCGCATCCTTAACCCCATCCTTGTCCTGAAATCTATATTCCAGTGAAAGTATCCGTGTTTCAAAGCACGCTTTTGAAGCGTTATATTGTAATTCACTAATCTACGTGTAATGTATCTATAAATAAACACTTTGCGGTTGCCTGCTTGACATGACAAGTGCAAACGCACAGCGTTTATTTATTAATATCAACAGCACACACTGGCACATGATGCAGAGATCGTCTGACTACTTCTAATTAGCATCAAGCTCGTTTTGTAACAGTTACGCAAACGCTTACGAAAACAATGCATTTCGTCAGTTGCGTAAAGAGTTCCGATCTCTACACAGATATGCACCTATATATATATATAACACCTATATGTATA                                                                      
      gi|50743784|gb|CF661532.2|CF661532                AGGCTATACAGTCTGAATCCAATTGTTTATAAGCACCGTCCGGCACGAATGGCATTTTTGCATGAATGTAAATACTGCTTATATATCAAAAAGGTGCGAAGCTAACGCTCTTCAGTGAATAGAGTGAATGGTCCCGCCTCCTGCTCGTTCTACTACGTCTATCAGCGTCGAGCACATGACTGCAGTAACTGTGTTCTGTAACTCCAGTCACGAGGATGGAGTACTATTACACTGACCAGACAGCGAGCTCAACCCAATAACCCGAAACGAGCACATTTACAACGCTTACAATATCCCTGCTGACACAAGGACACAGGACAACACCACCGAGCGTTTCCTAAAAGCGTTCAAATGTTACGAAAACGAGTCGTCACCTTTCAGTGACACCTGACACACCGTACACGGAGCGCGCGGTTTGTAAACATGCCCGAATTGGCGATTTCATTTAT*GATGCGAAAATGATTCTTCACCGGCACGTGCTATATTTTGAATTAAAAAGAATACATCAATGCACCGCATCCTTAACCCCATCCTTGCCCTGAAATCTATATTCCAGTGAAAGTATCCGTGTTTCAAAGCACGCTTTTGAAGCGTTATATTGTAATTCACTAATCTACGTGTAATGTATCTATAAATAAACACTTTGCGGTTGCCTGCTTGACATGACAAGTGCAAACGCACAGCGTTTATTTATTAATATCAACAGCACACACTGGCACATGATGCAGAGATCGTCTGACTACTTCTAATTAGCATCAAGCTCGTTTTGTAACAGTTACGCAAACGCTTACGAAAACAATGCATTTCGTCAGTTGCGTAAAGAGTTCCGATCTCTACACAGATATGCACCTATATATATATATAACACCTATATGTATACATTTTGTAAGCATATGTATAGGCTACATTTTGT                                    
      gi|50742746|gb|CF660641.2|CF660641                 GGCTATACAGTCTGAATCCAATTGTTTATAAGCACCGTCCGGCACGAATGGCATTTTTGCATGAATGTAAATACTGCTTATATATCAAAAAGGTGCGAAGCTAACGCTCTTCAGTGAATAGAGTGAATGGTCCCGCCTCCTGCTCGTTCTACTACGTCTATCAGCGTCGAGCACATGACTGCAGTAACTGTGTTCTGTAACTCCAGTCACGAGGATGGAGTACTATTACACTGACCAGACAGCGAGCTCAACCCAATAACCCGAAACGAGCACATTTACAGCGCTTACAATATCCCTGCTGACACAAGGACACAGGACAACACCACCGAGCGTTTCCTAAAAGCGTTCAAATGTTACGAAAACGAGTCGTCACCTTTCAGTGACACCTGACACACCGTACACGGAGCGCGCGGTTTGTAAACATGCACGAATTGGCGATTTCATTTAT*GATGCGAAAATGATTCTTCACCGGCACGTGCTATATTTTGAATTAAAAAGAATACATCAATGCACCGCATCCTTAACCCCATCCTTGTCCTGAAATCTATATTCCAGTGAAAGTATCCGTGTTTCAAAGCACGCTTTTGAAGCGTTATATTGTAATTCACTAATCTACGTGTAATGTATCTATAAATAAACACTTTGCGGTTGCCTGCCTGACATGACAAGTGCAAACGCACAGCGTTTATTTATTAATATCAACAGCACACACTGGCACATGATGCAGAGATCGTCTGACTACTTCTAATTAGCATCAAGCTCGTTTTGTAACAGTTACGCAAACGCTTACGAAAACAATGCATTTCGTCAGTTGCGTAAAGAGTTCCGATCTCTACACAGATATGCACCTATATATATATATAACACCTATATGTATACATTTTGTAAGCATATGTATAGGCTACATTTTGTAAAGGCATACAGTGCTGCGTATCATTTTTTCAACTG
      gi|50742723|gb|CF660634.2|CF660634                                                  ACCGTCCGGCACGAATGGCATTTTTGCATGAATGTAAATACTGCTTATATATCAAAAAGGTGCGAAGCTAACGCTCTTCAGTGAATAGAGTGAATGGTCCCGCCTCCTGCTAGTTCTACTACGTCTATCAGCGTCGAGCACATGACTGCAGGAACTGTGTTCTGTAACTCCAGTCACGAGGATGGAGTACTATTACACTGACCAGACAGCGAGCTCAACCCAATAACCCGAAGCGAGCACATTTACAGCGCTTACAATATCCCTGCTGACACAAGGACACAGGACAACACCACCGAGCGTTTCCTAAAAGCGTTCAAATGTTACGAAAACGAGTCGTCACCTTTCAGTGACACCTGACACACCGTACGCGGAGCGCGCGGTTTGTAAACATGCACGAATTGGCGATTTCATTTAT*GATGCGAAAATGATTCTTCACCGGCACGTGCTATATTTTGAATTAAAAAGAATACATCAATGCACCGCATCCTTAACCCCATCCTTGTCCTGAAATCTATATTCCAGTGAAAGTATCCGTGTTTCAAAGCACGCTTTTGAAGCGTTATATTGTAATTCACTAATCTACGTGTAATGTATCTATAAATAAACACTTTGCGGTTGCCTGCTTGACATGACAAGTGGCAACGCACAGCGTTTATTTATTAATATCAACAGCACACGCTGGCACAT                                                                                                                                                                                                                                    
      gi|50742717|gb|CF660632.2|CF660632                                                                                                                                                                                                       AGTAACTGTGTTCTGTAAATCCCATCACGAAGATGGAGTACTATTACACTGACCAGACAGCGAGCTCGACCCAATAACCCGAAACGAGCACTTTTACGACGCTTACTATATCCCTGCTGACACAATGACACAGGACAACACCACCGAGCGTTTCCTAAAAGCGTTCAAATGTAACGAAAACGAGTCGTCACCTTTCAGTGACACTTGAGACGCCGTACACGGAGCGCGCGGTTTGTAAACATGCACGAATTGGCGATTTCATTTATAGATGCGAAAATGATTCTTCATCGGCACGTGCTATATTTTGAAATAAAAAGAATACATCAATGCACCGCAACCTTAACTCCATCCTTGTCCTGAAATCTATATTCCAGTGAAAGTATCCAAGTTTCAAAGCACGCTT                                                                                                                                                                                                                                                                                                                                                                            
      gi|50743801|gb|CF661546.2|CF661546                                                                                                                                                                                                                                                                                                                                                                                                                                           LLGTTTGTAAACATGCCCAAATTGGCGATTTCACTTAT*GATGCTAAAATGATTCTTCACCGGCACGTACTATATTTTCAATTAAAAAGAATACATCAGTGCACCGCATCCTTAACCCCATCCTAGCCCTGAAATCTATATTCCAGTGAAAGTATCCGTGTTTCAAAACACCCTTTTGAAGCGCTATATTGTAATTCACTAATCTACGTGTAATGTATCTATAAATAAACACTTTGCGGTTGCCTGCTTGACATGACAAGTGCAAAC                                                                                                                                                                                                                                                                                

Putative SNPs: 25A>T, 293G>A, 439A>C
